# Supplementary figures and images for: Rh(iii)-catalyzed (5 + 2)-cycloaddition reactions of ortho-hydroxyethyl phenols with internal alkynes: efficient synthesis of benzoxepines
Source: Royal Society of Chemistry journal article supplement (doi:10.1039/d3ob00170a), 2023-01-01

**NMR SPECTRA AND HRMS OF SYNTHESIZED COMPOUNDS**

7.43  
7.42  
7.41  
7.40  
7.34  
7.32  
7.32  
7.26  
7.25  
7.24  
7.24  
7.23  
7.23  
7.23  
7.22  
7.22  
7.21  
7.21  
7.21  
7.20  
7.20  
7.19  
7.19  
7.19  
7.18  
7.18  
7.17  
7.16  
7.16  
7.16  
7.15  
7.15  
7.15  
7.14  
7.14  
7.13  
6.99  
6.99  
6.89  
6.89  
6.43  
6.40

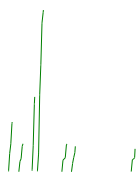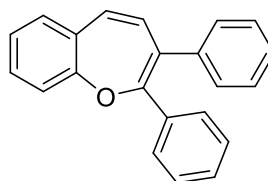

3aa

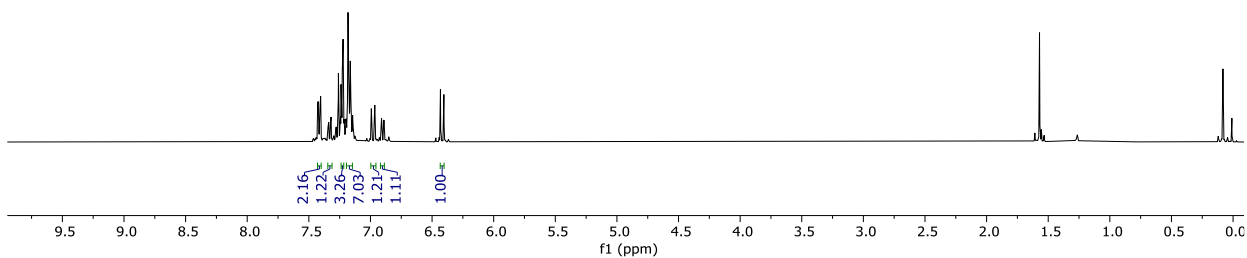

154.62  
148.16  
139.17  
135.36  
132.26  
131.41  
130.72  
130.39  
130.14  
129.89  
128.32  
128.28  
128.16  
127.54  
127.35  
127.30  
124.65  
121.08  
77.32  
77.00  
76.68

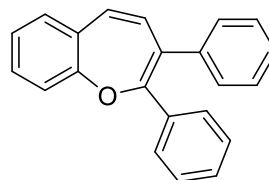

3aa

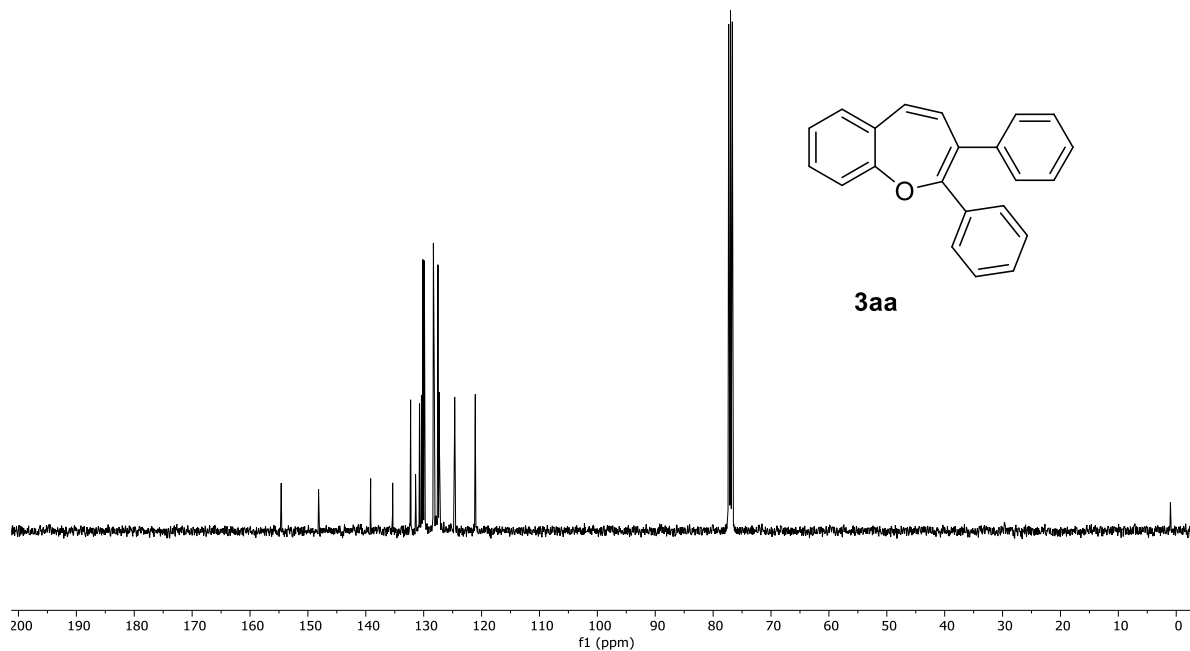

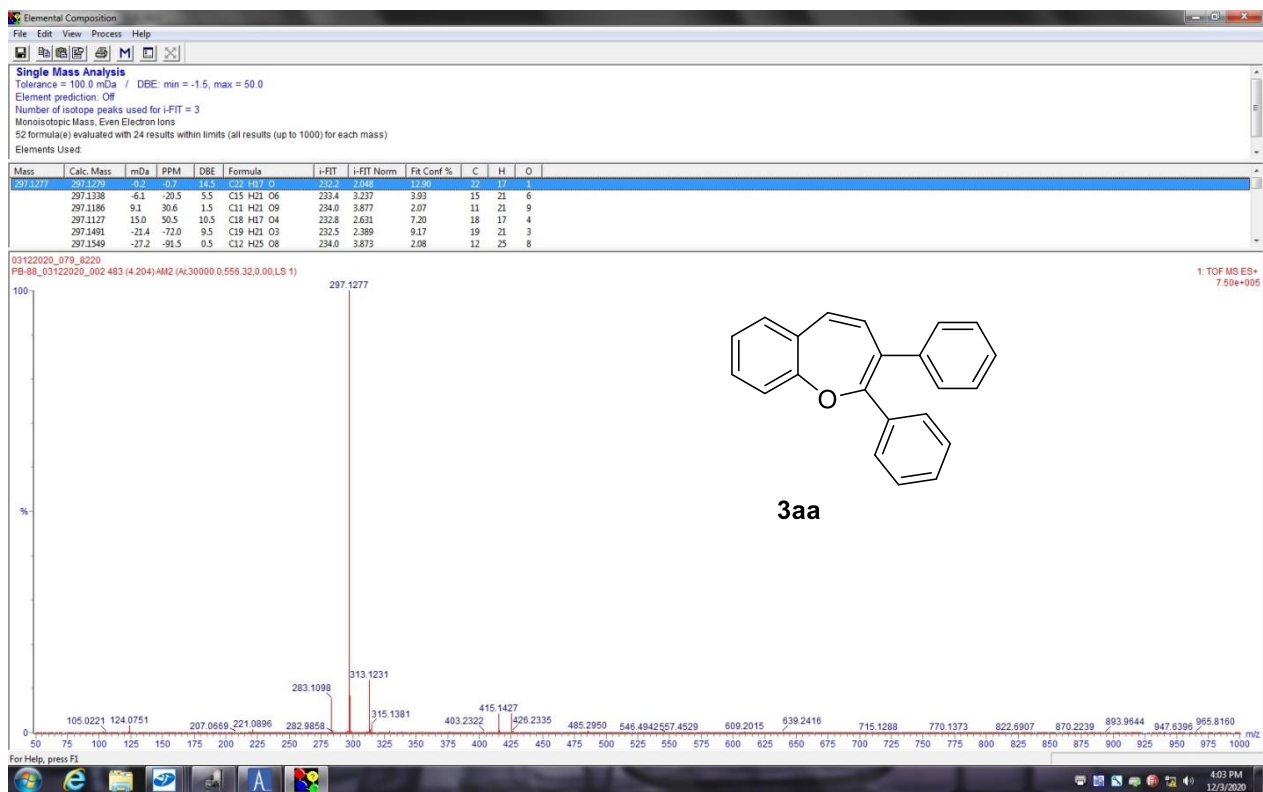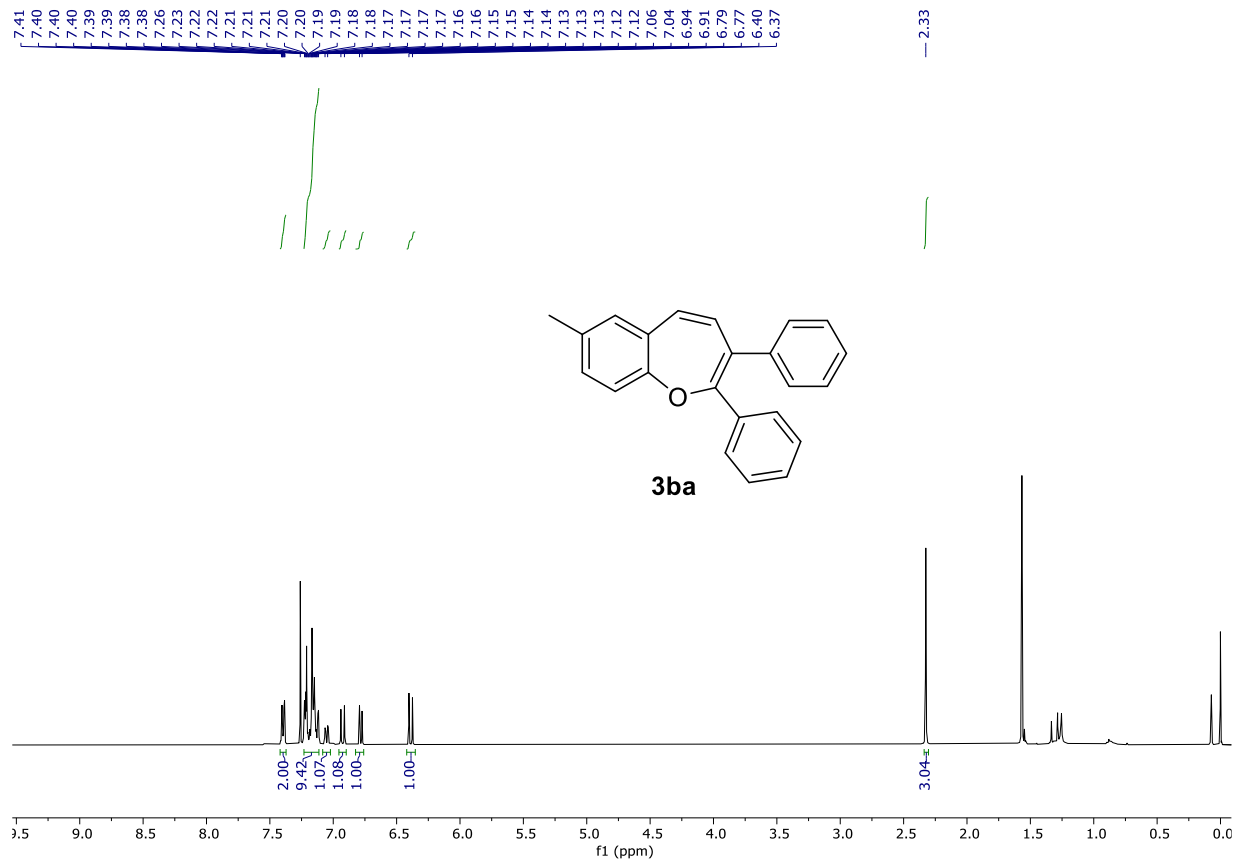

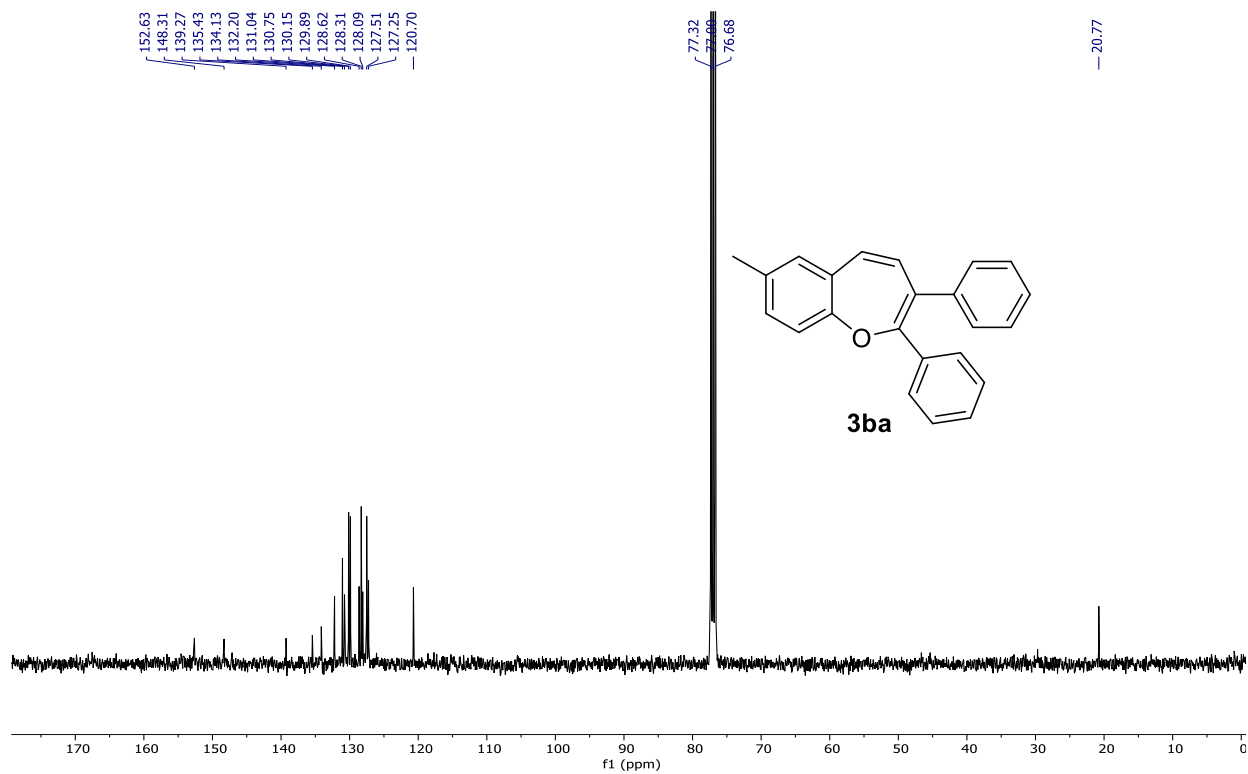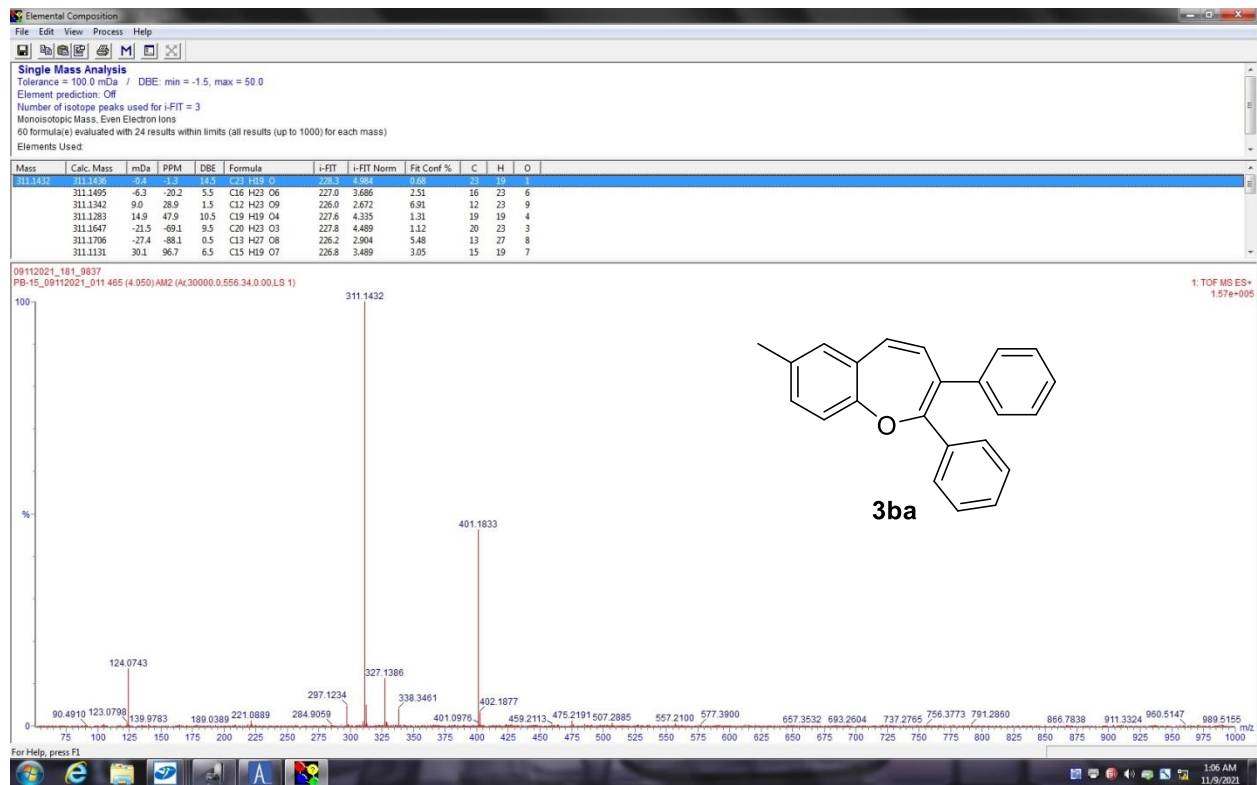

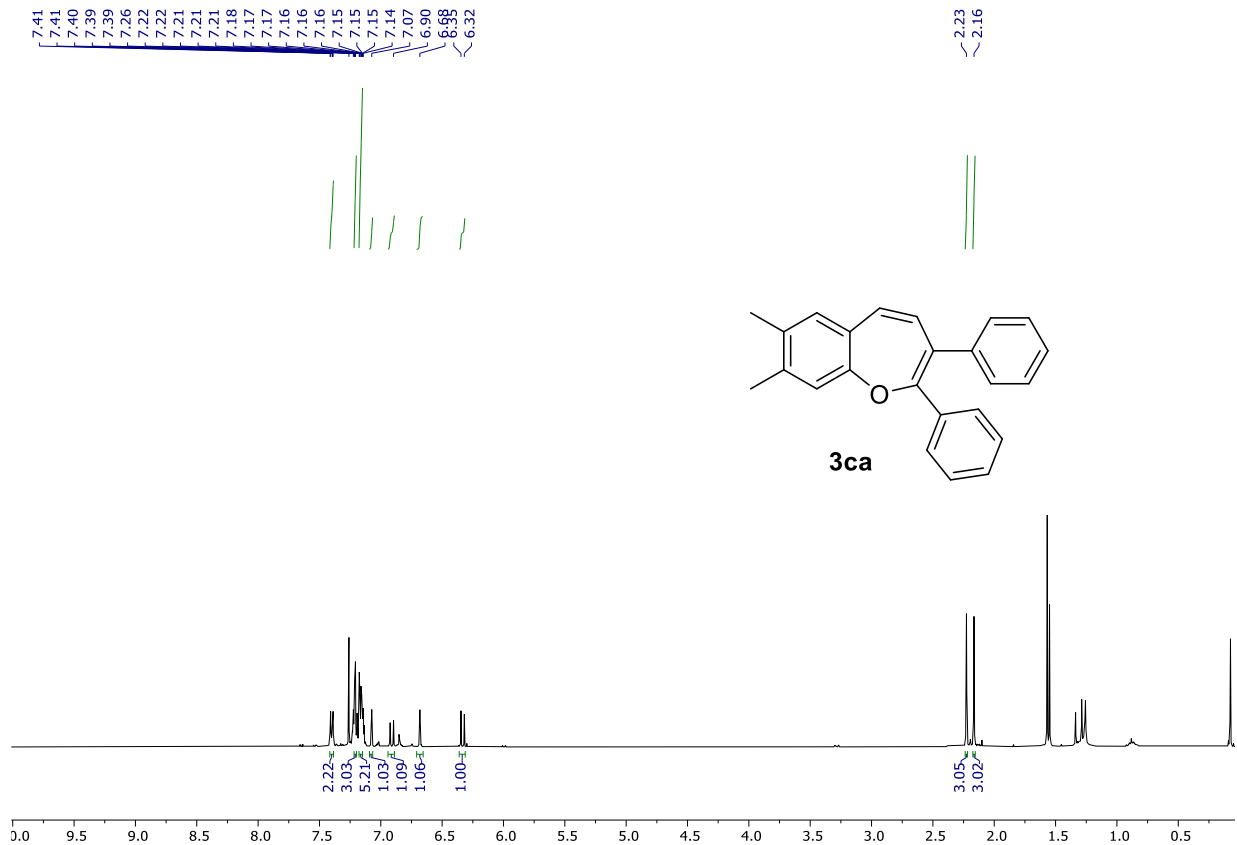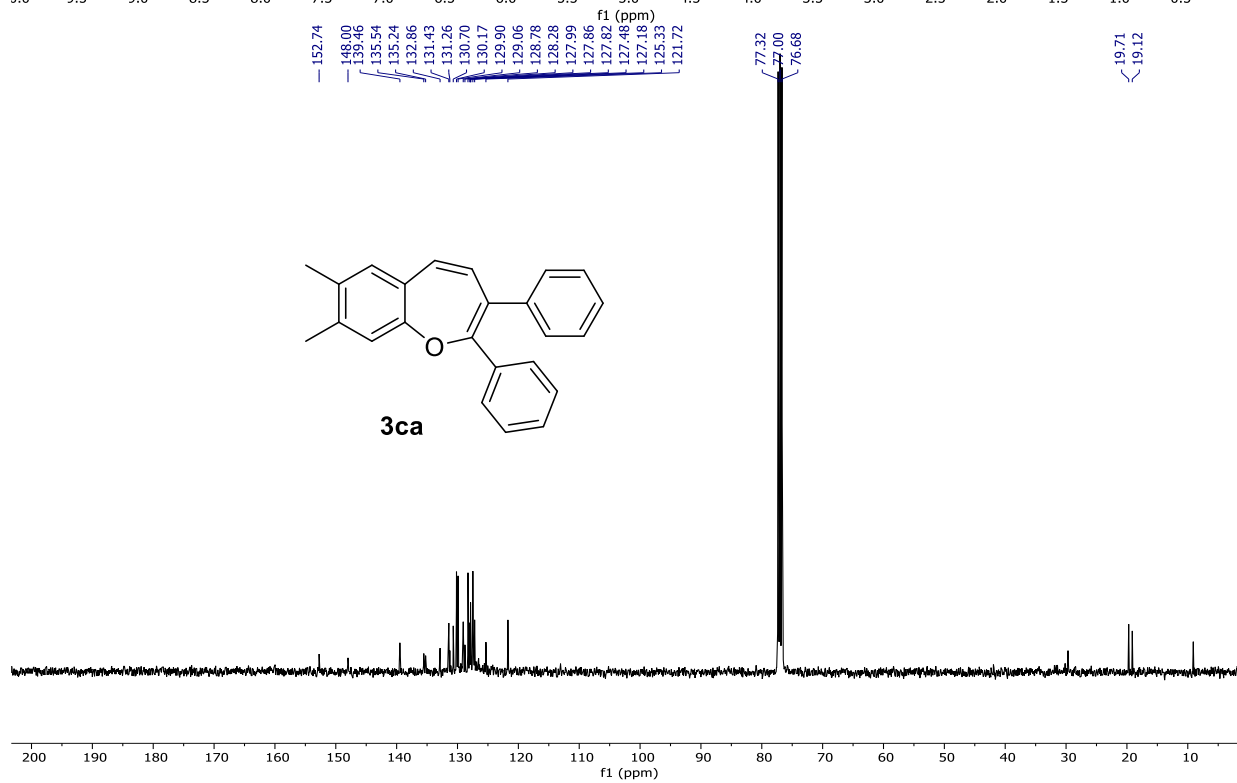

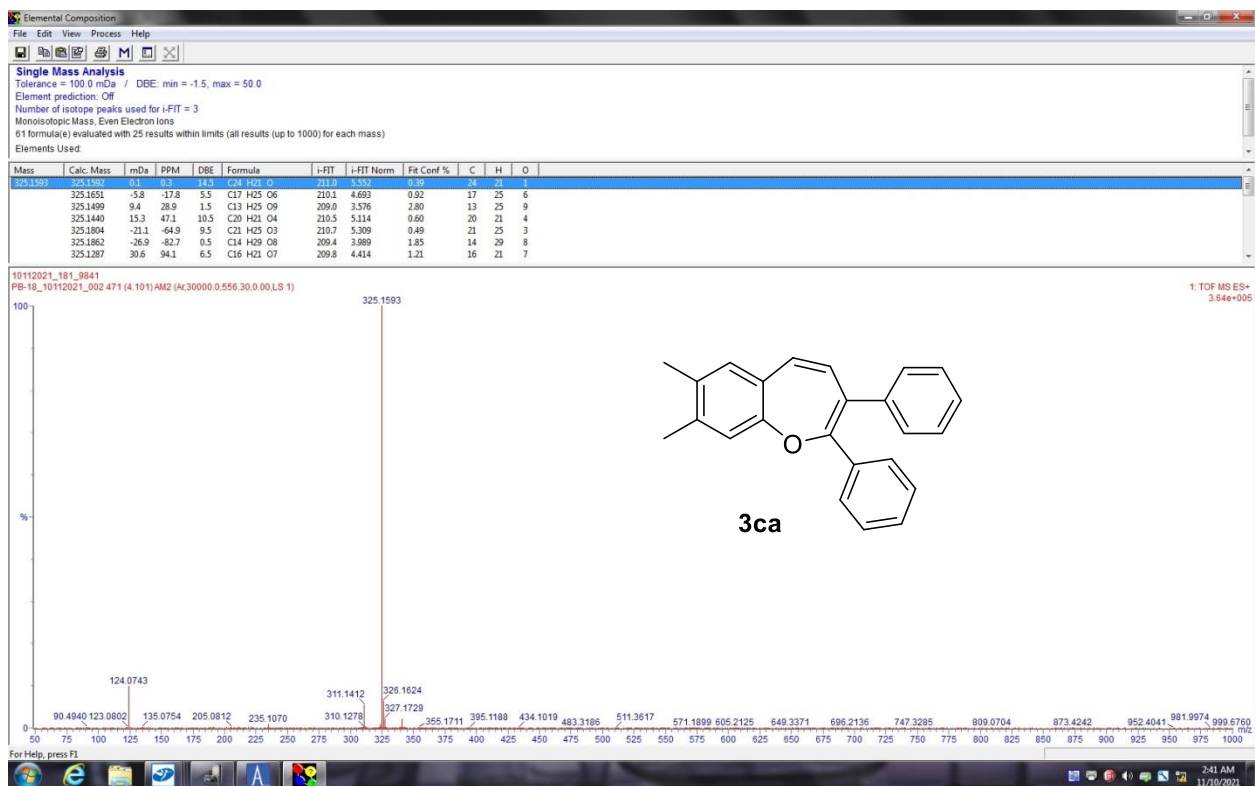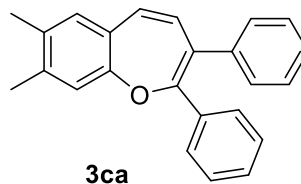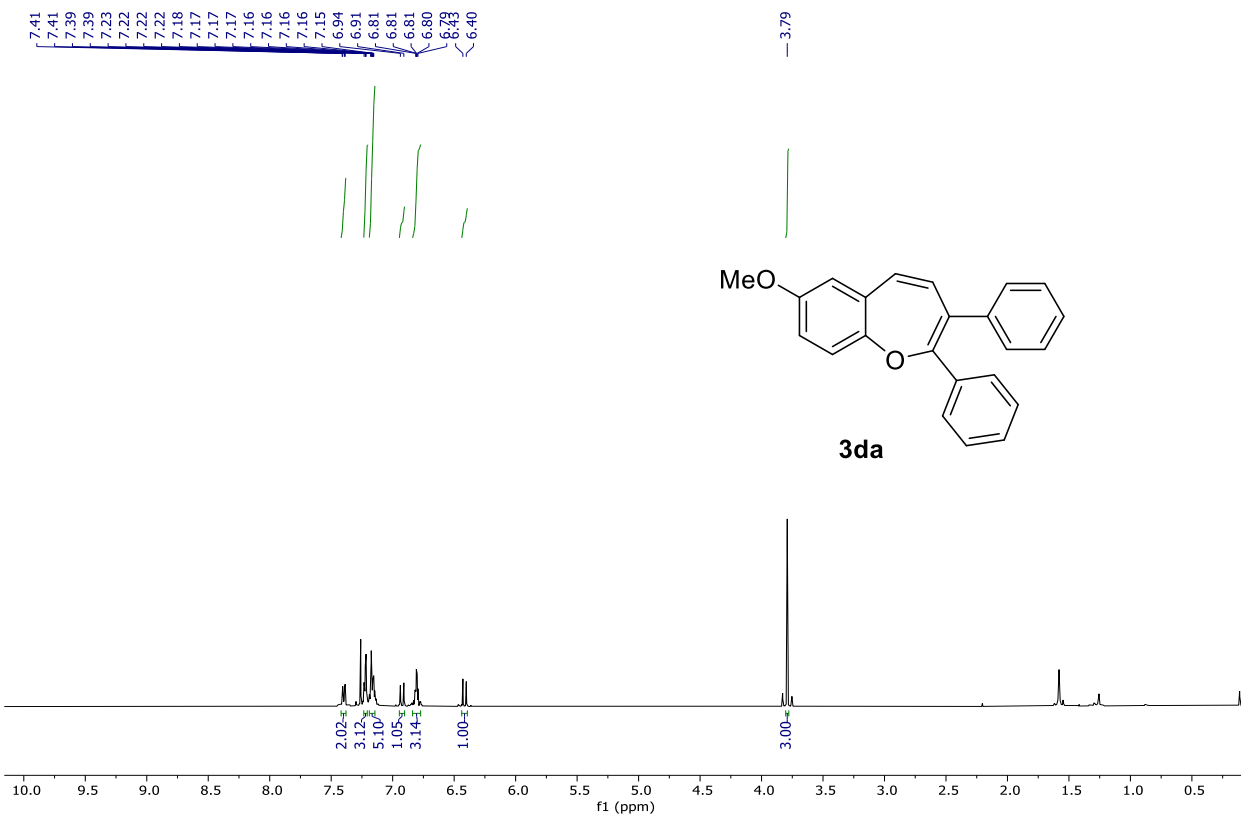

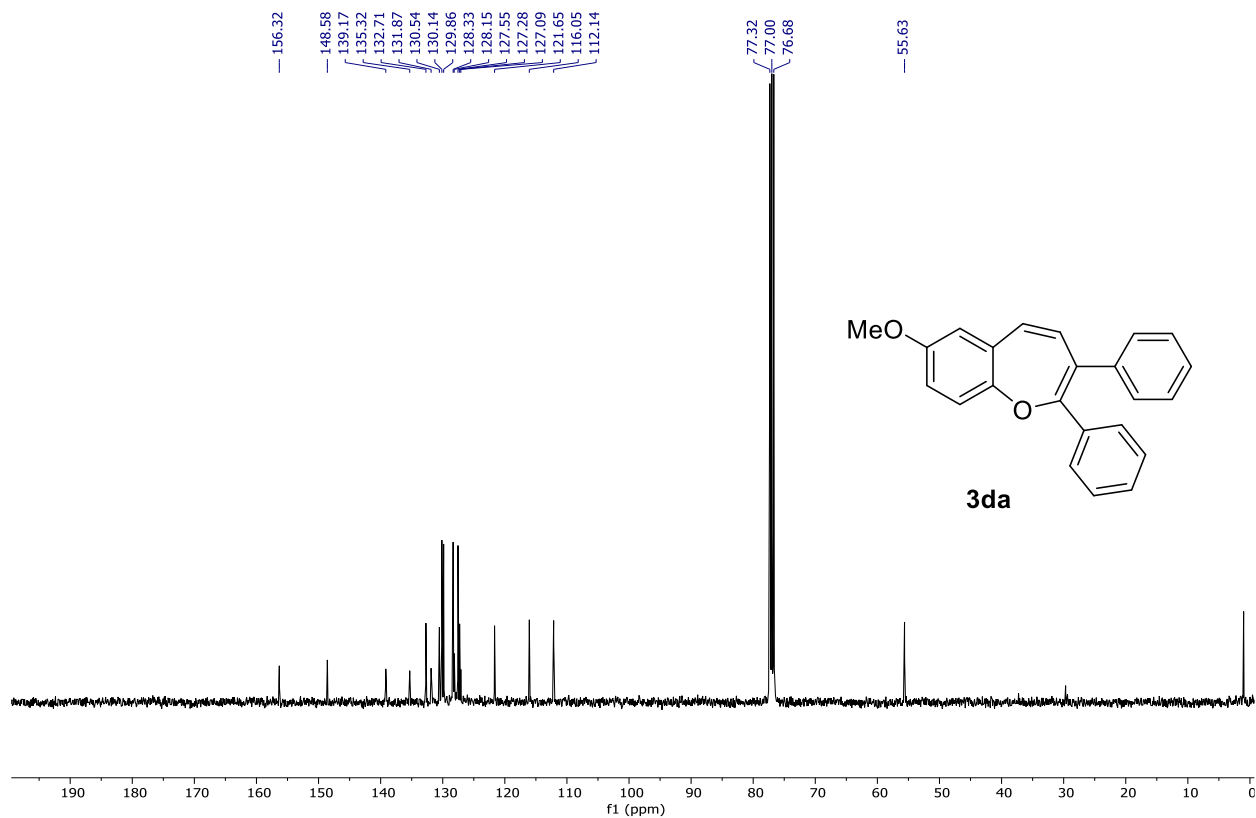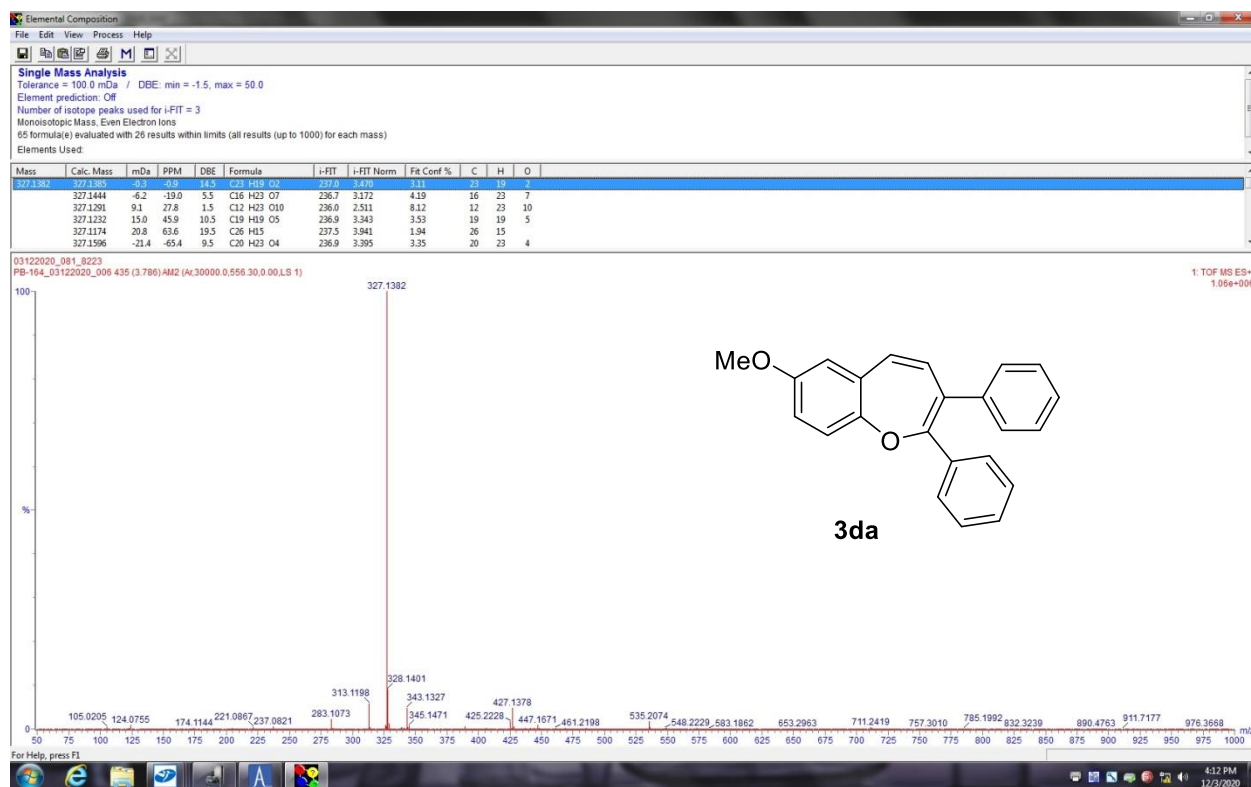

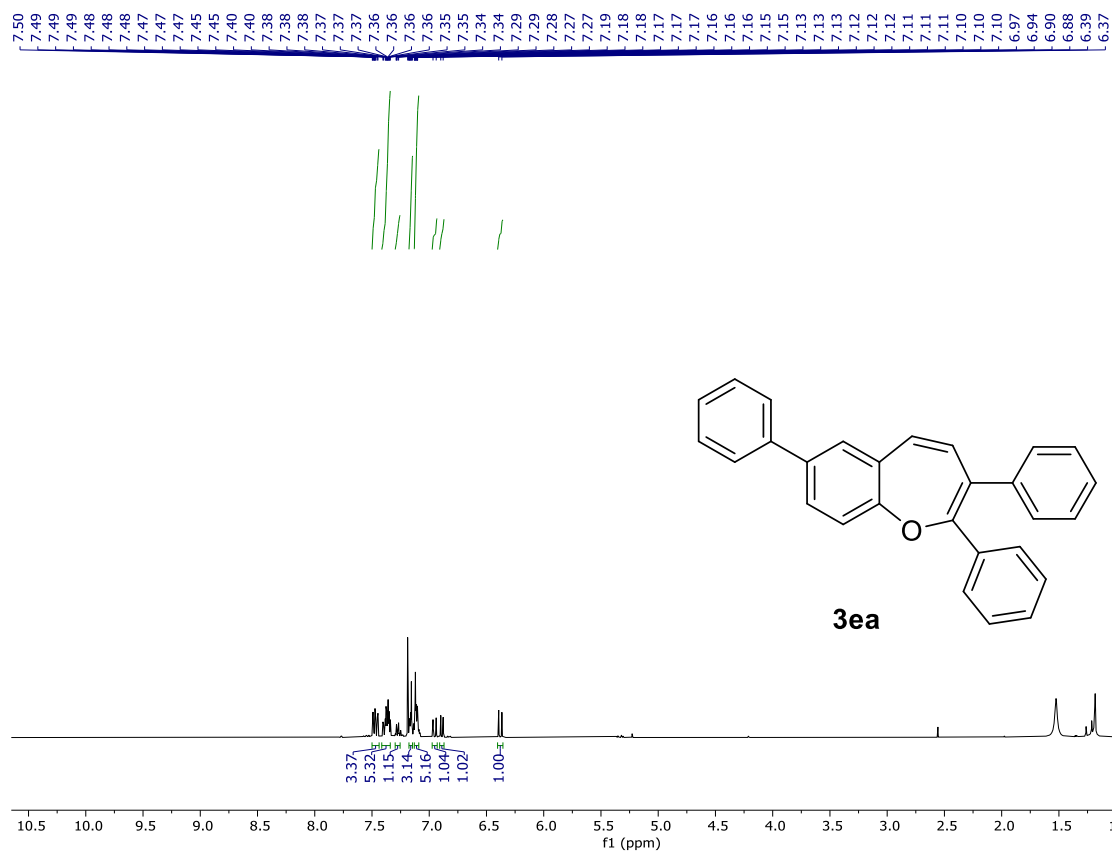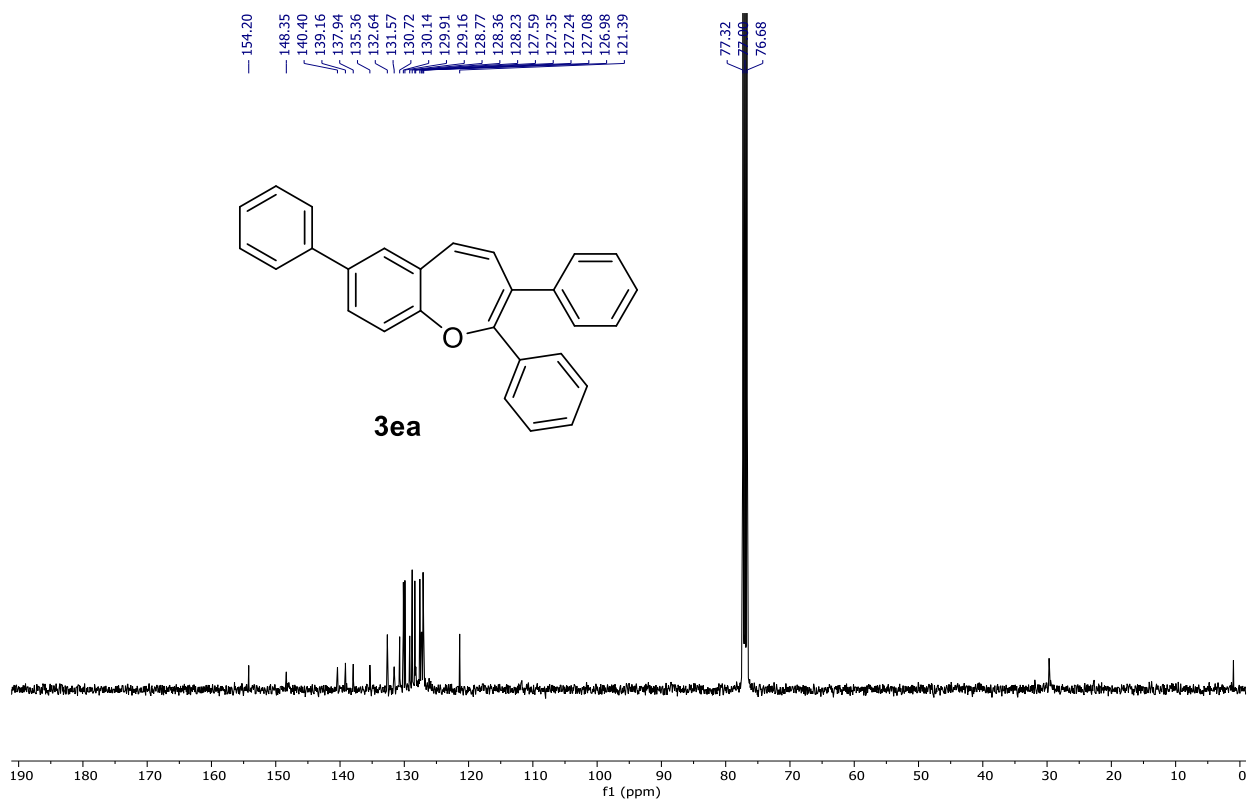



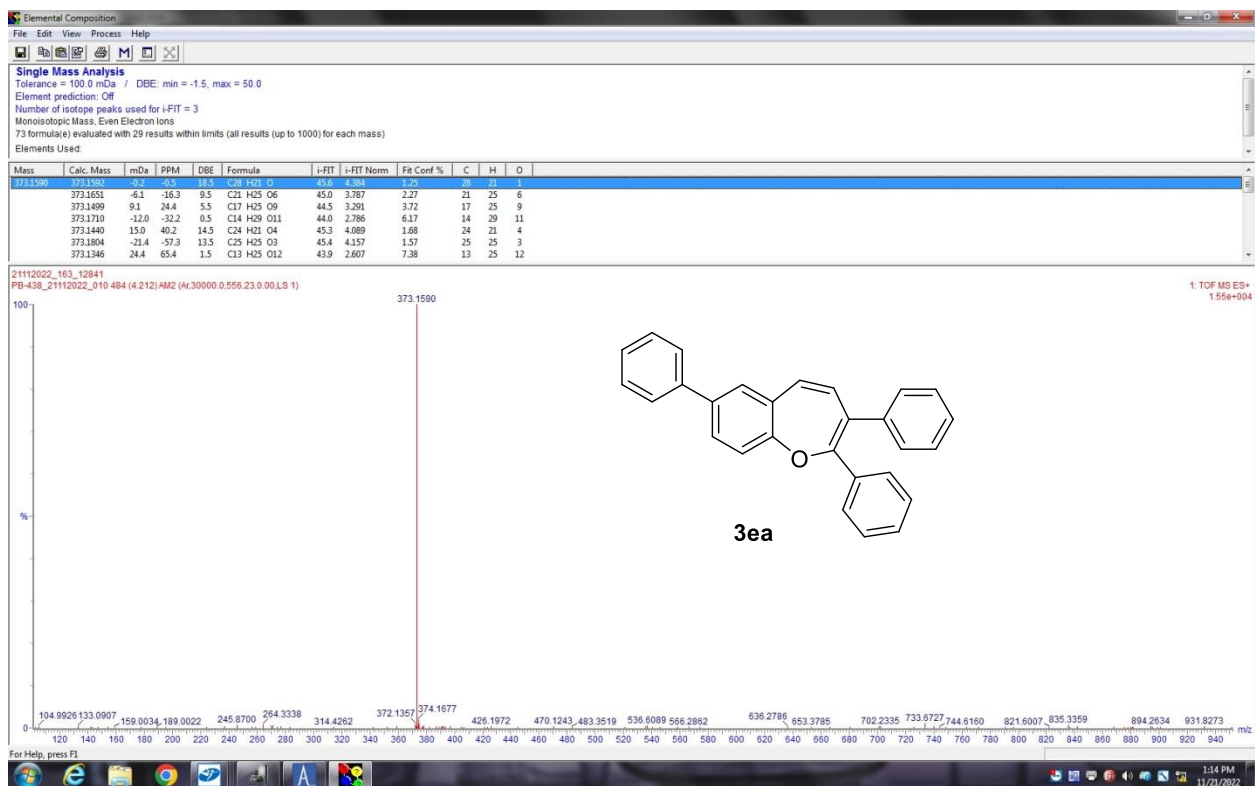

7.52  
7.51  
7.51  
7.50  
7.50  
7.50  
7.49  
7.48  
7.47  
7.46  
7.44  
7.44  
7.43  
7.43  
7.43  
7.42  
7.42  
7.41  
7.40  
7.39  
7.26  
7.25  
7.24  
7.24  
7.24  
7.23  
7.23  
7.22  
7.22  
7.21  
7.21  
7.20  
7.20  
7.19  
7.19  
7.18  
7.18  
7.17  
7.17  
7.17  
7.16  
7.13  
7.13  
7.12  
7.12  
7.11  
7.11  
7.10  
7.09  
7.02  
7.00  
6.96  
6.94  
6.47  
6.44

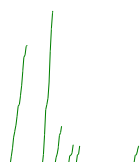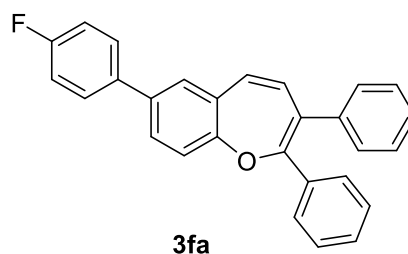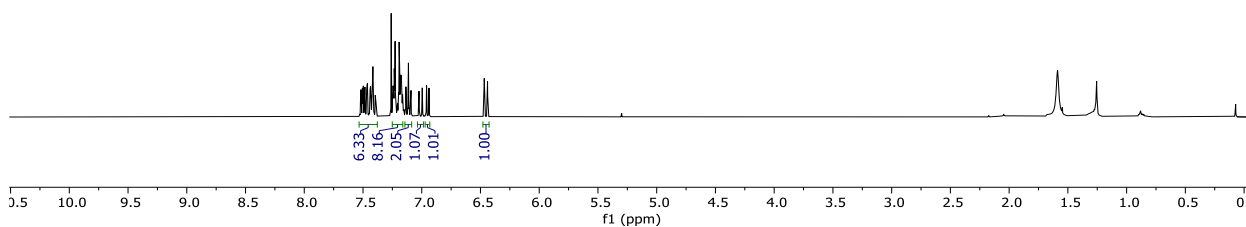

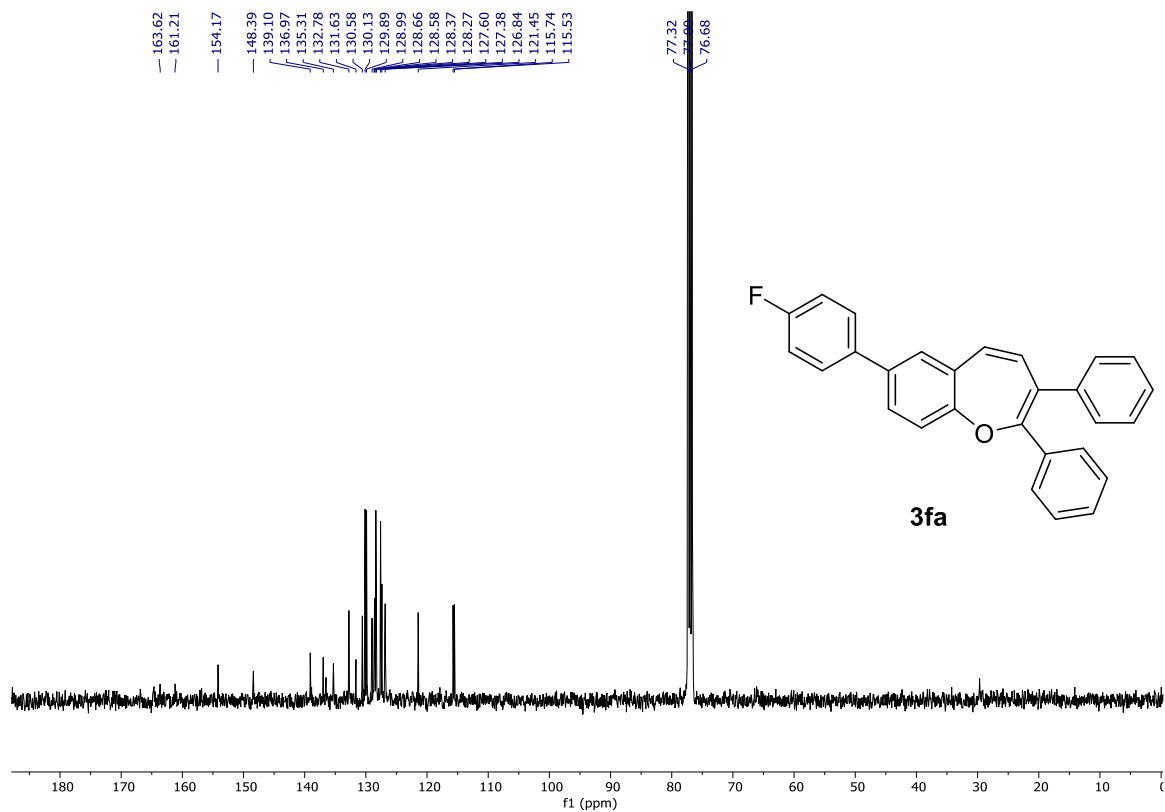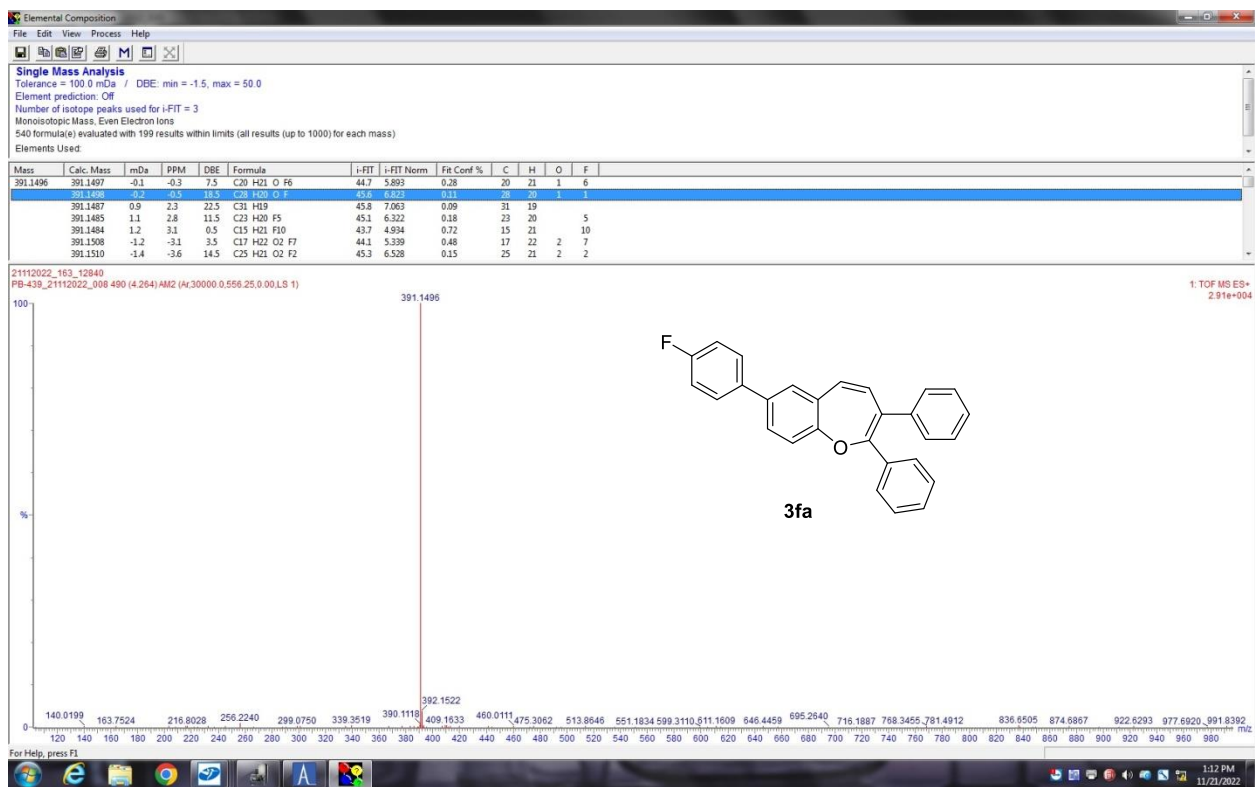

7.45  
7.44  
7.43  
7.43  
7.29  
7.28  
7.28  
7.27  
7.27  
7.26  
7.26  
7.25  
7.25  
7.24  
7.24  
7.23  
7.23  
7.22  
7.22  
7.21  
7.21  
7.20  
7.20  
7.19  
7.19  
7.18  
7.18  
7.17  
7.17  
7.05  
7.04  
7.03  
7.02  
6.99  
6.98  
6.97  
6.96  
6.95  
6.94  
6.94  
6.91  
6.88  
6.87  
6.86  
6.85  
6.50  
6.46

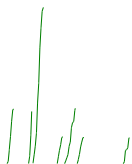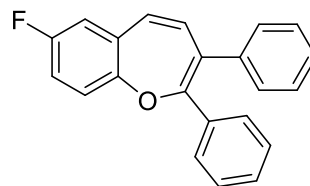

3ga

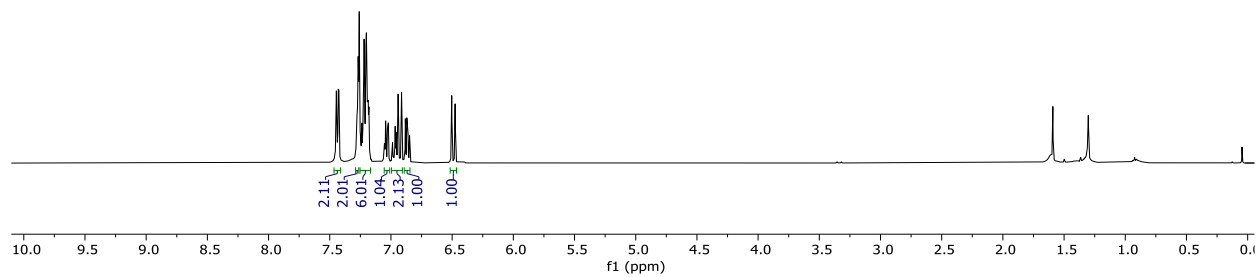

160.63  
158.21  
150.49  
148.52  
138.84  
135.01  
133.39  
132.51  
130.09  
129.83  
129.69  
128.38  
127.83  
127.63  
127.44  
122.21  
122.12  
116.85  
114.16  
113.92  
77.32  
77.00  
76.69

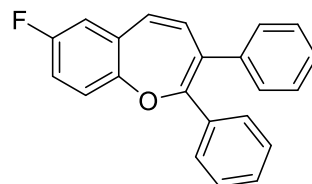

3ga

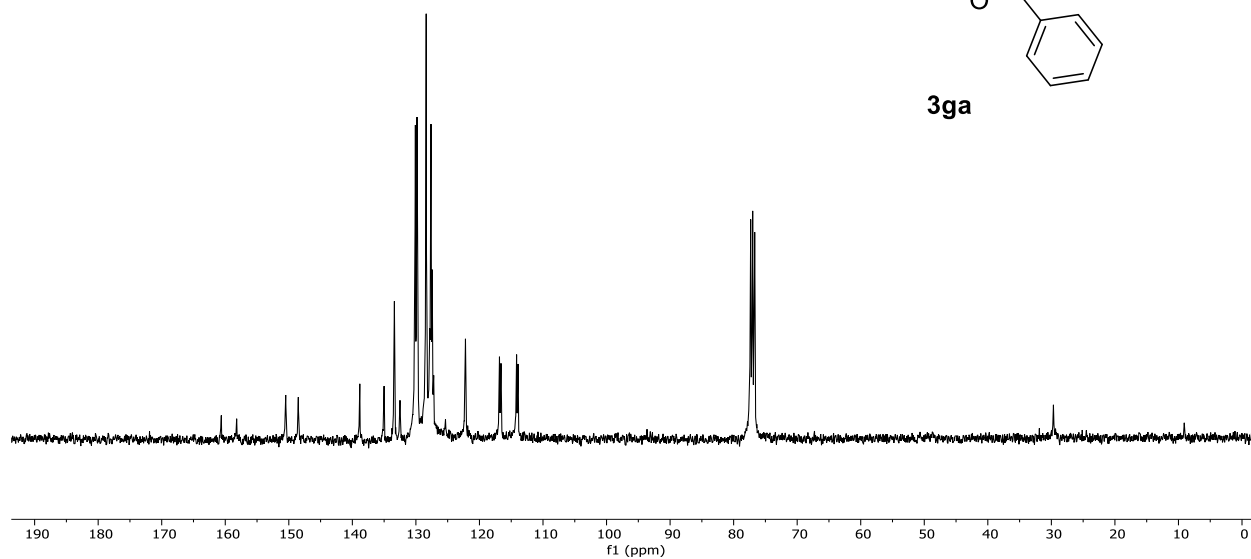

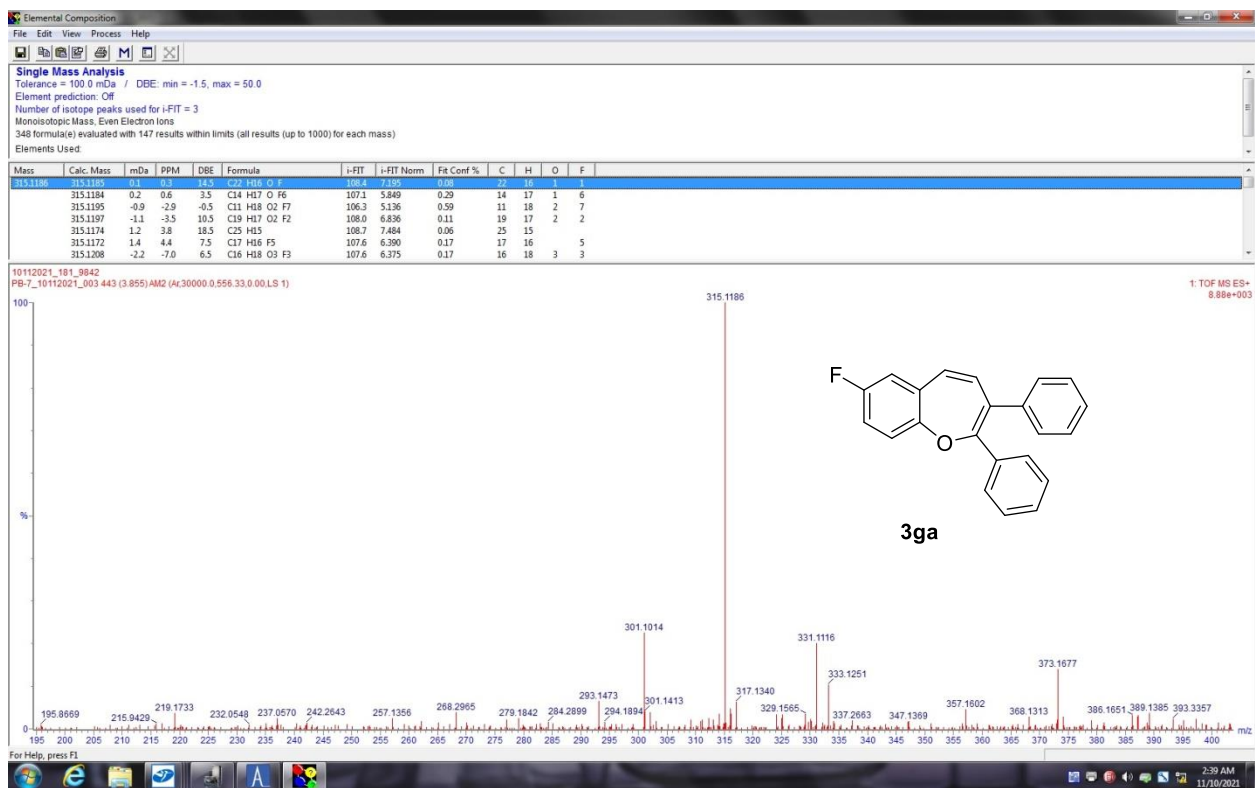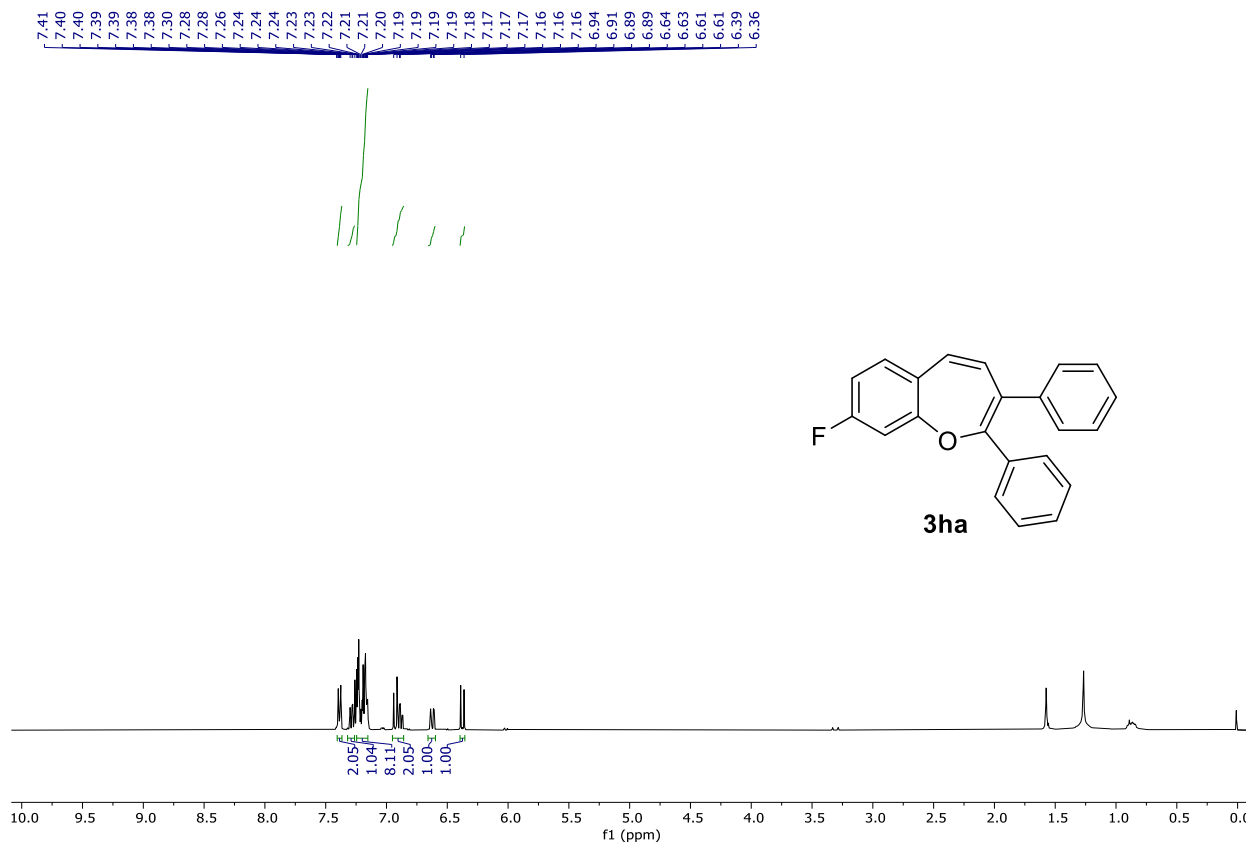

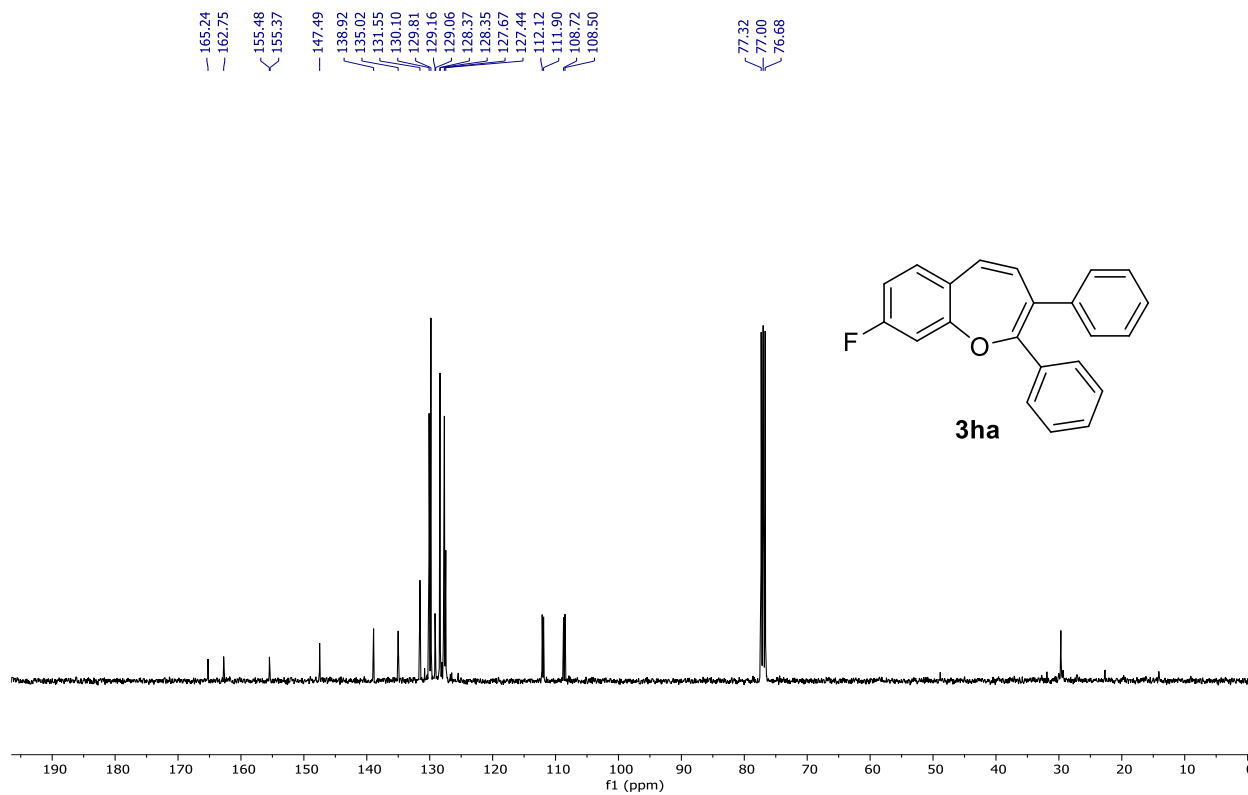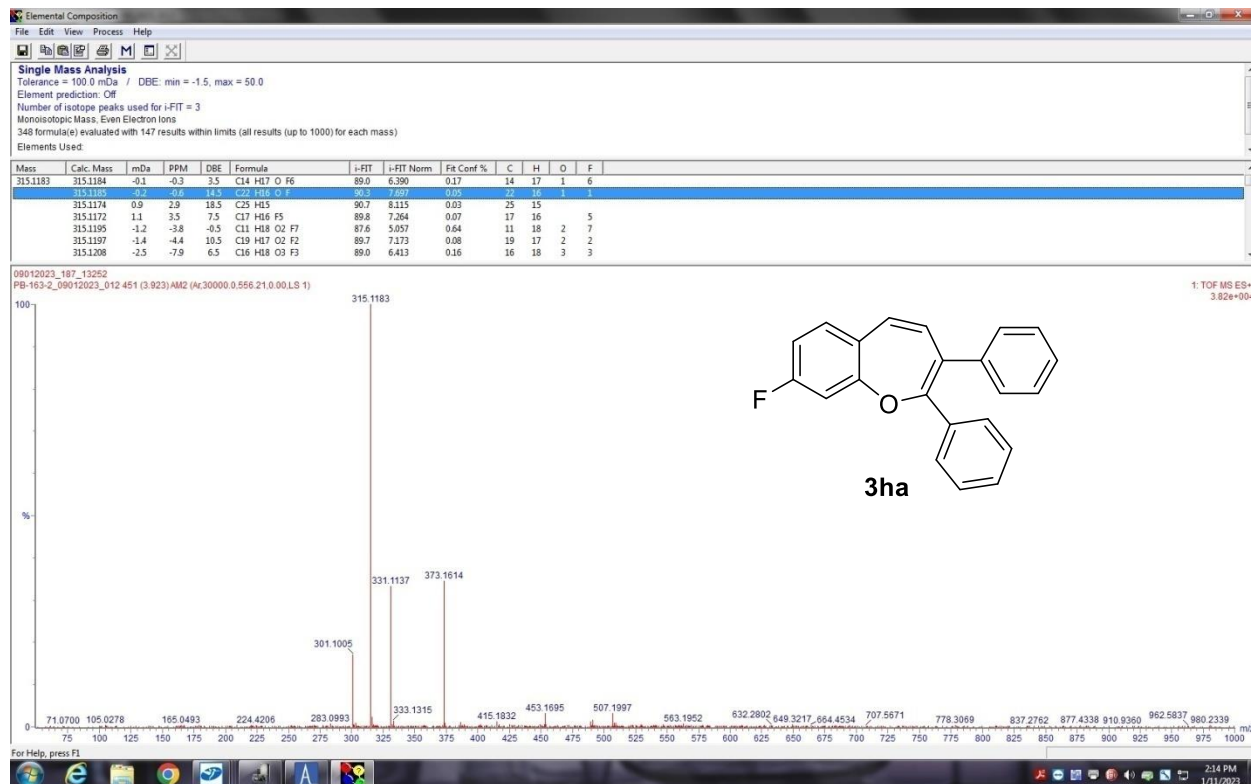

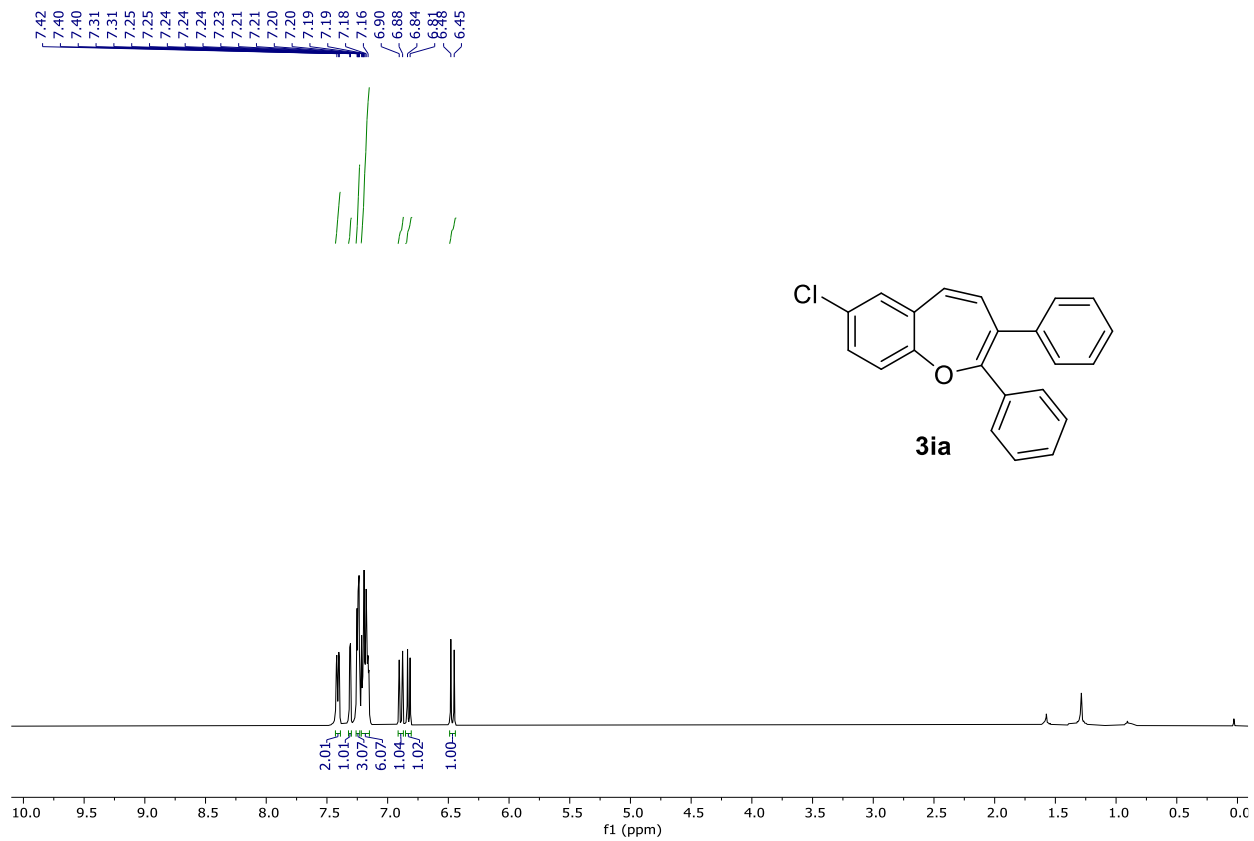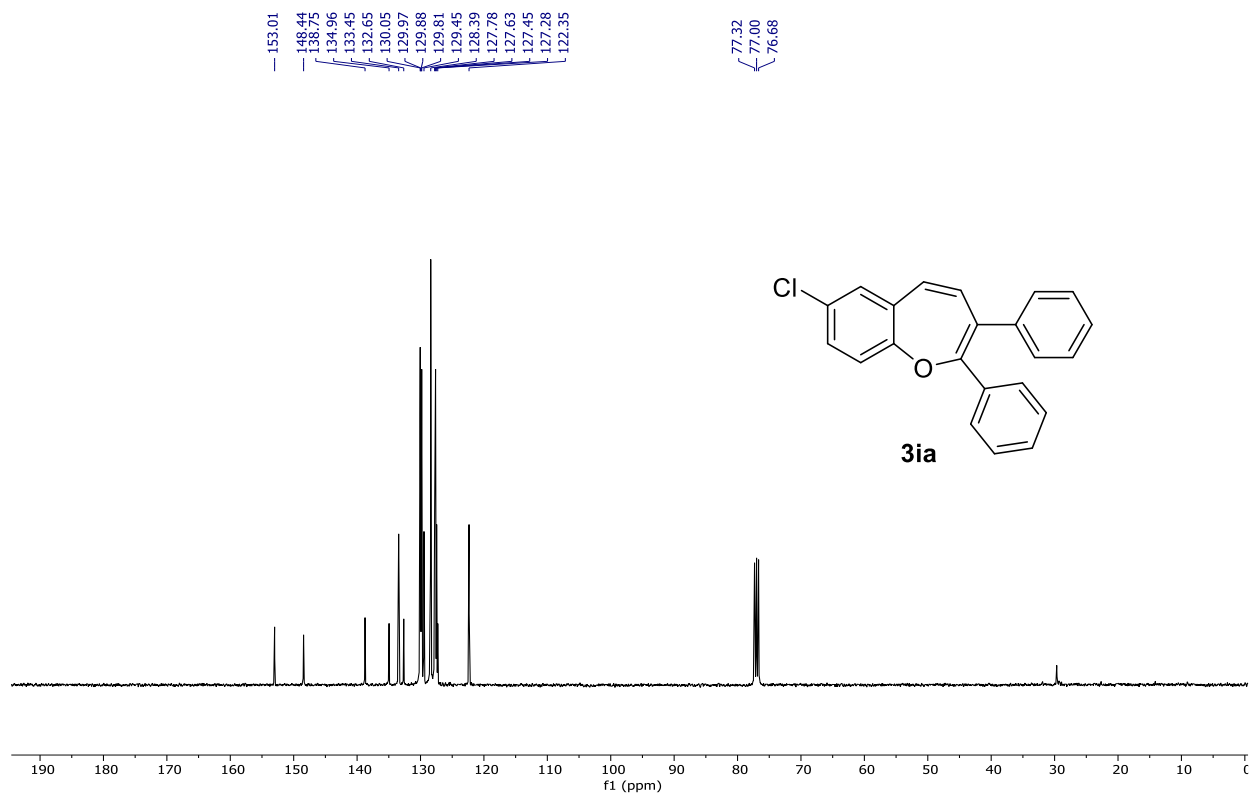

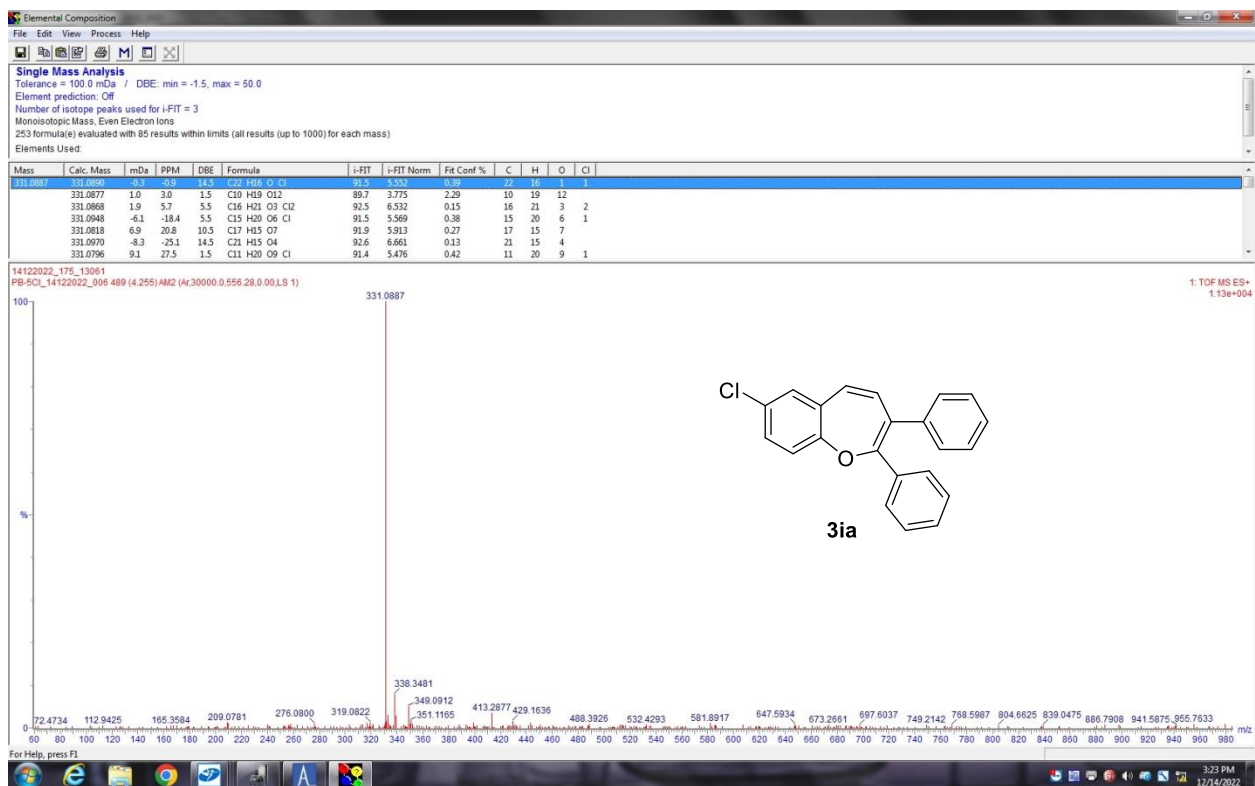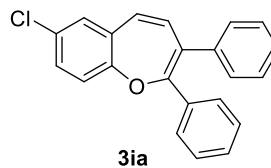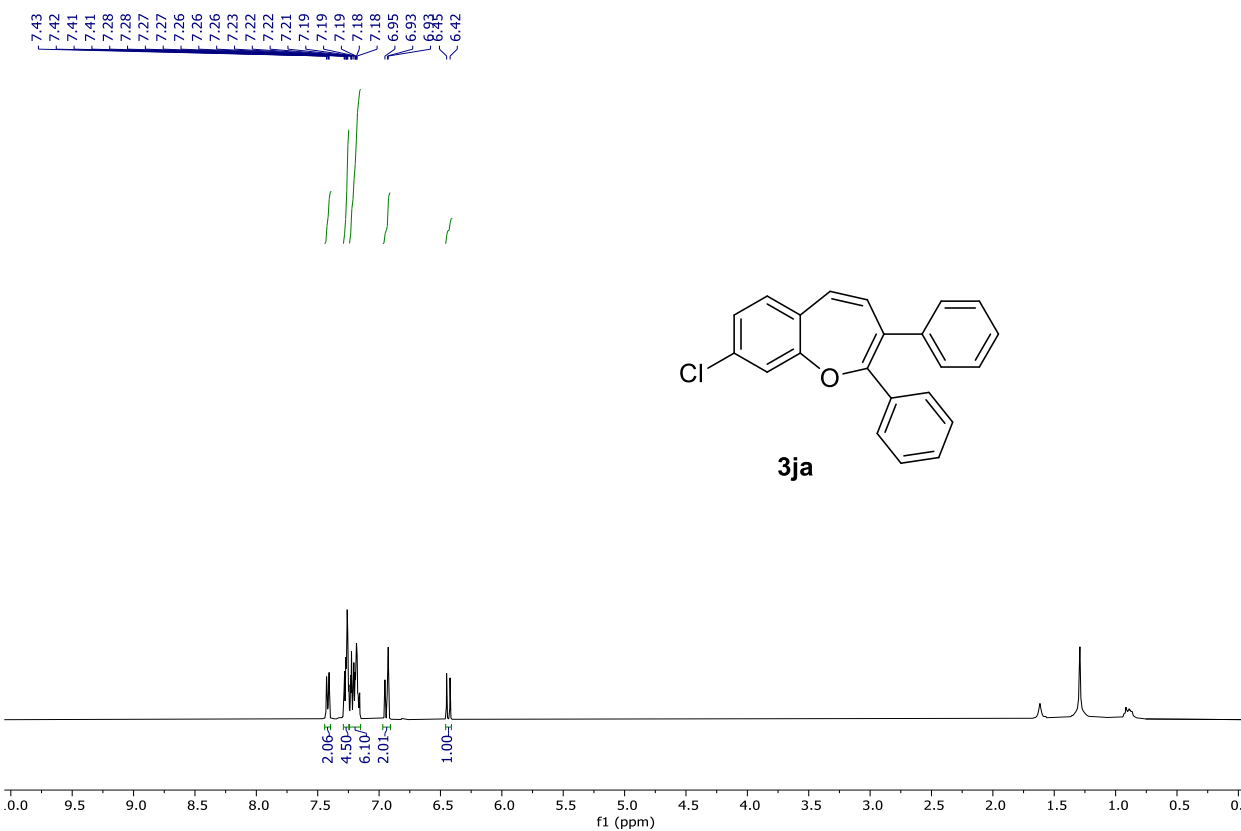

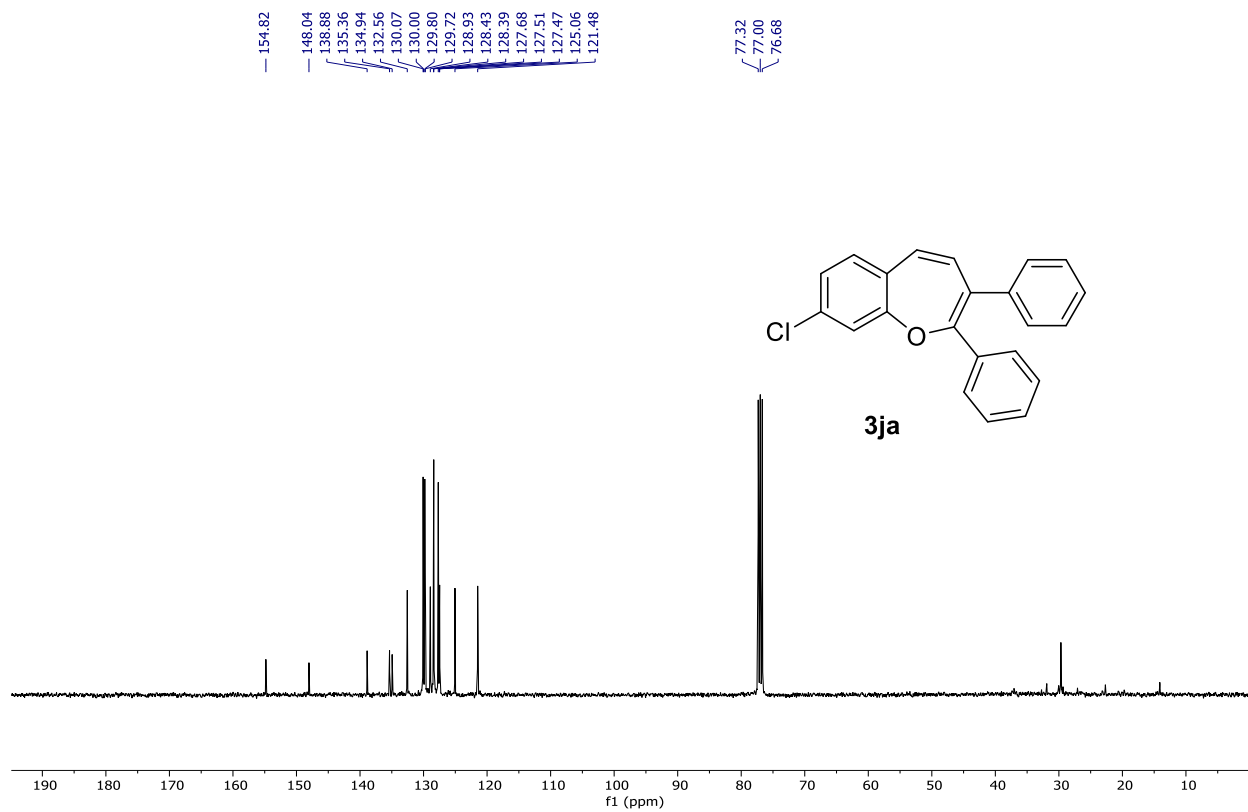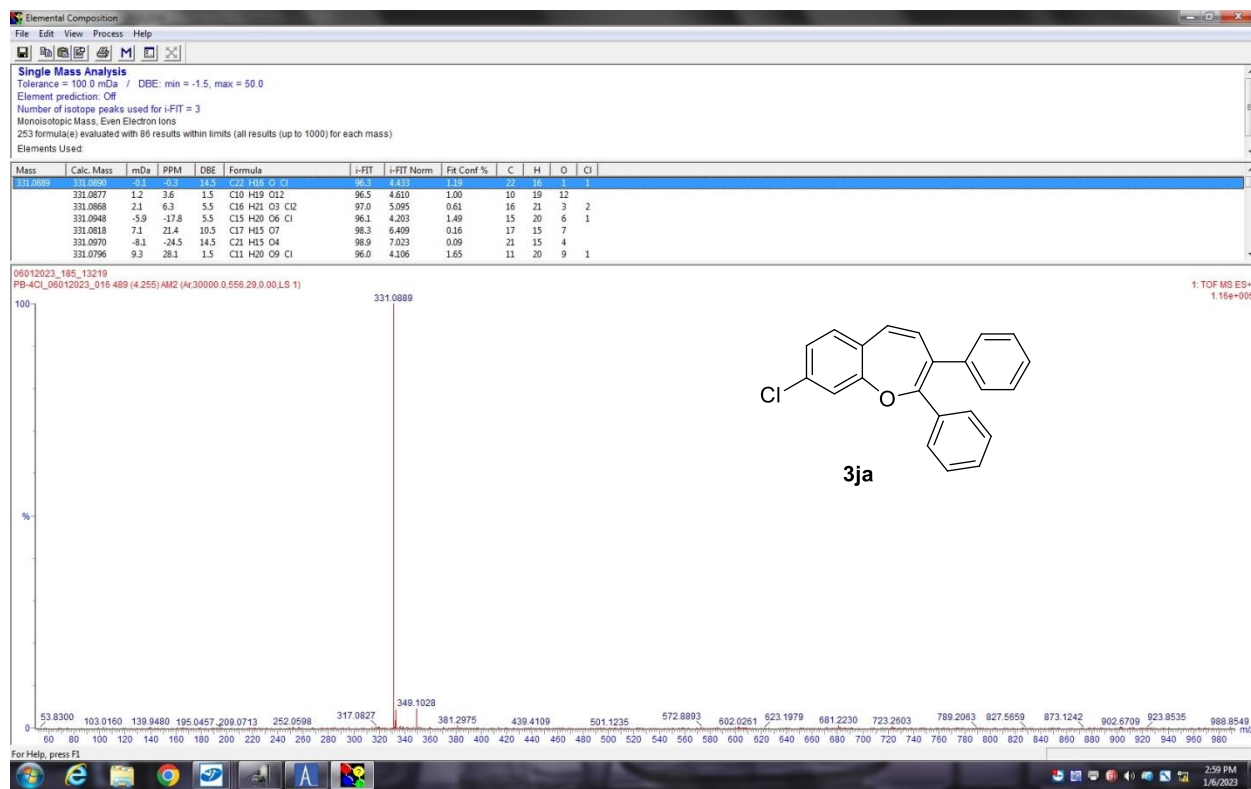



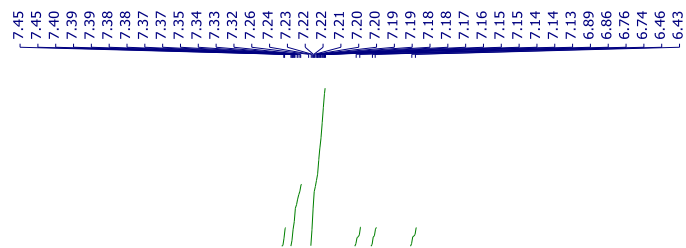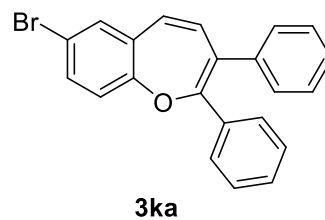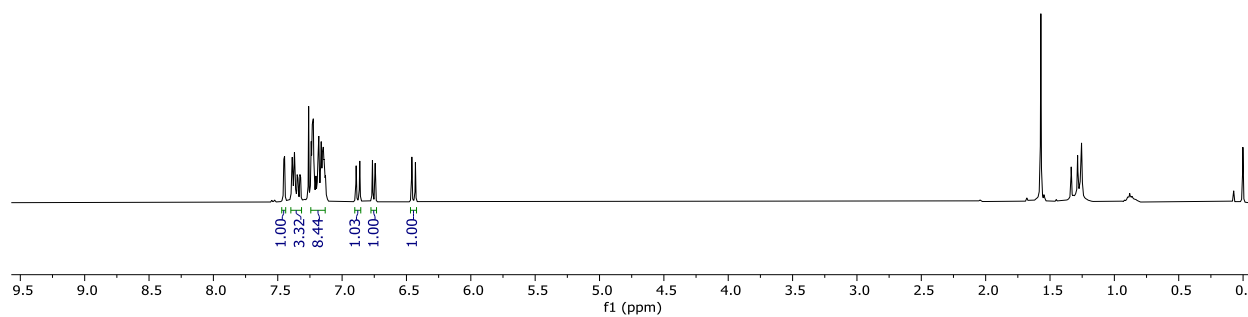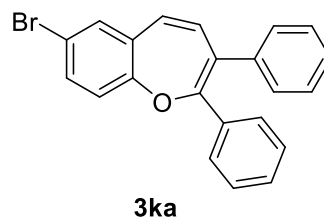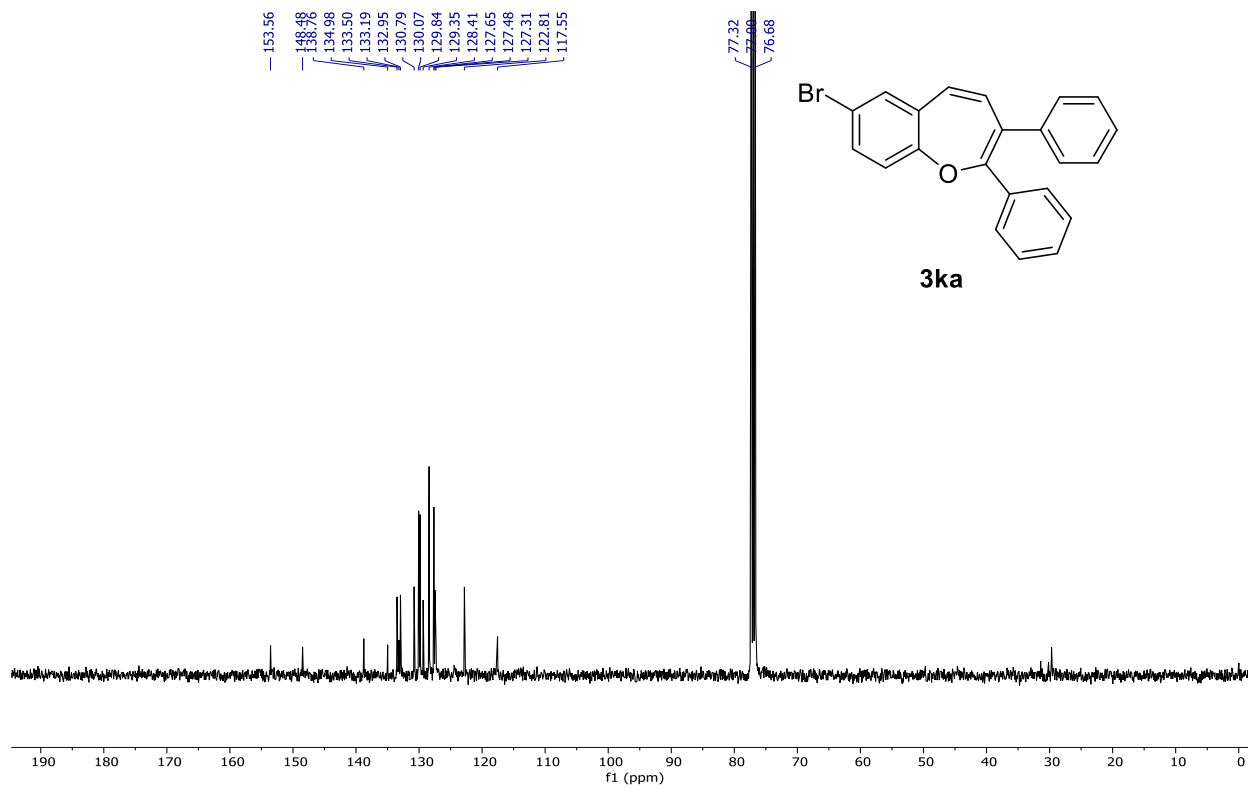

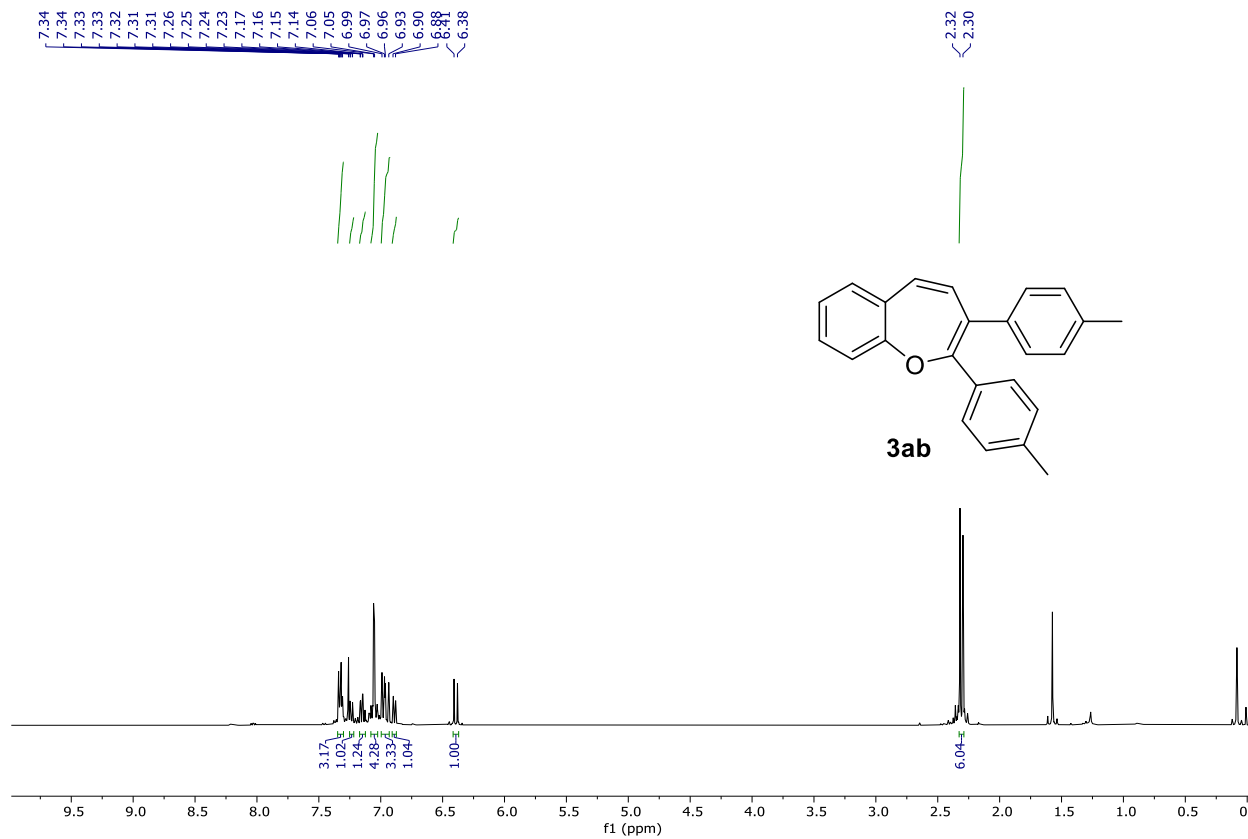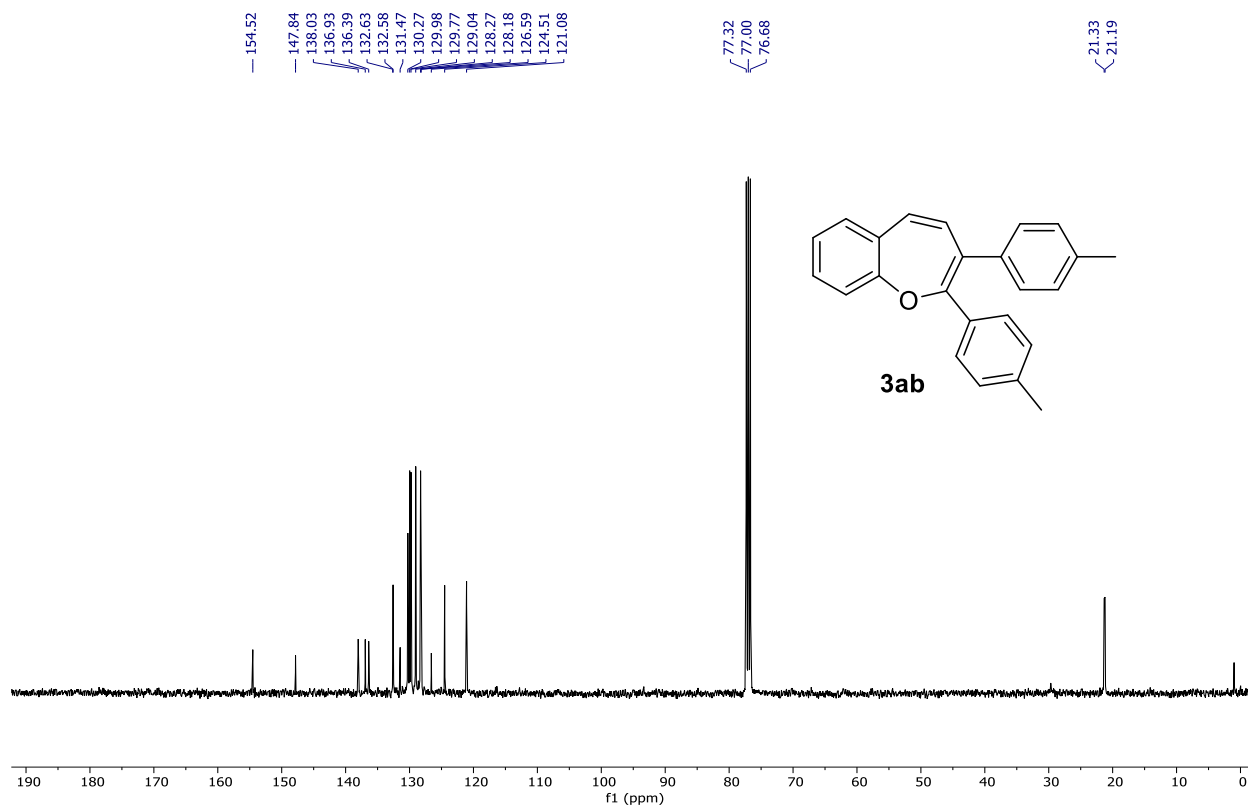

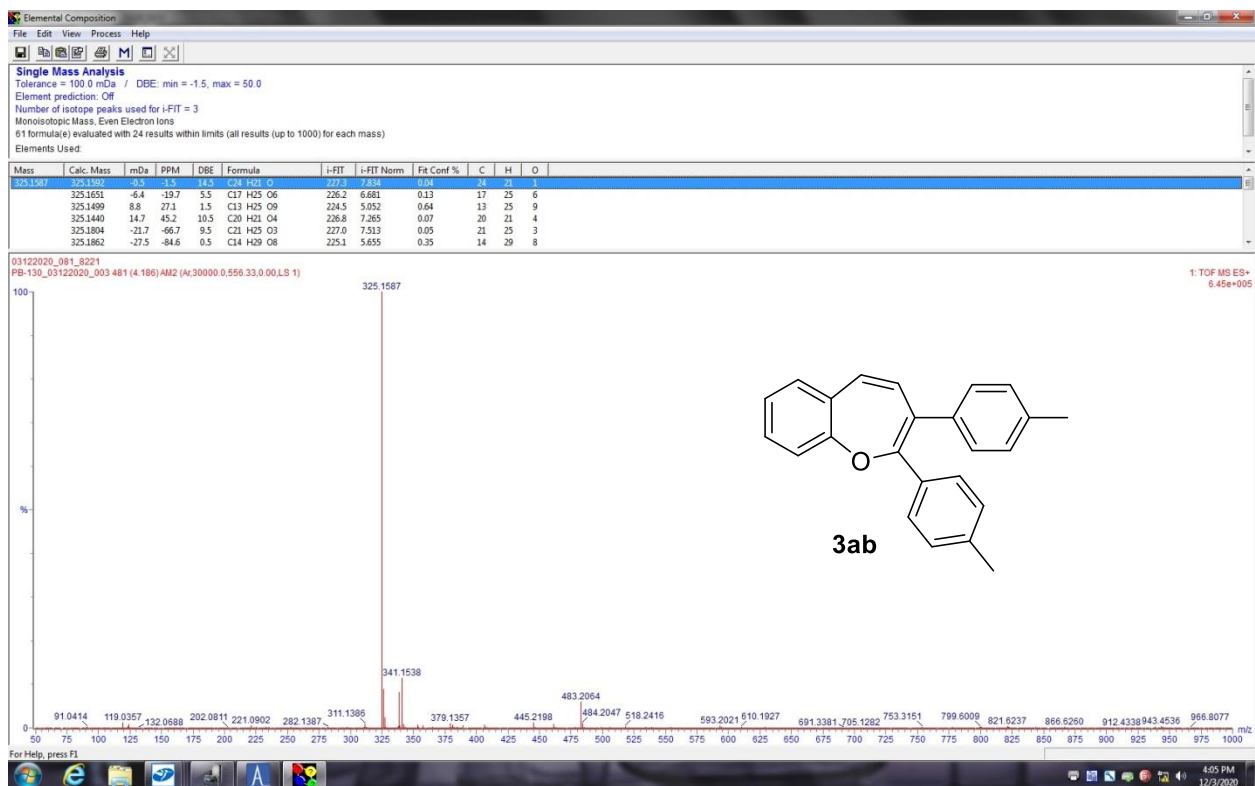

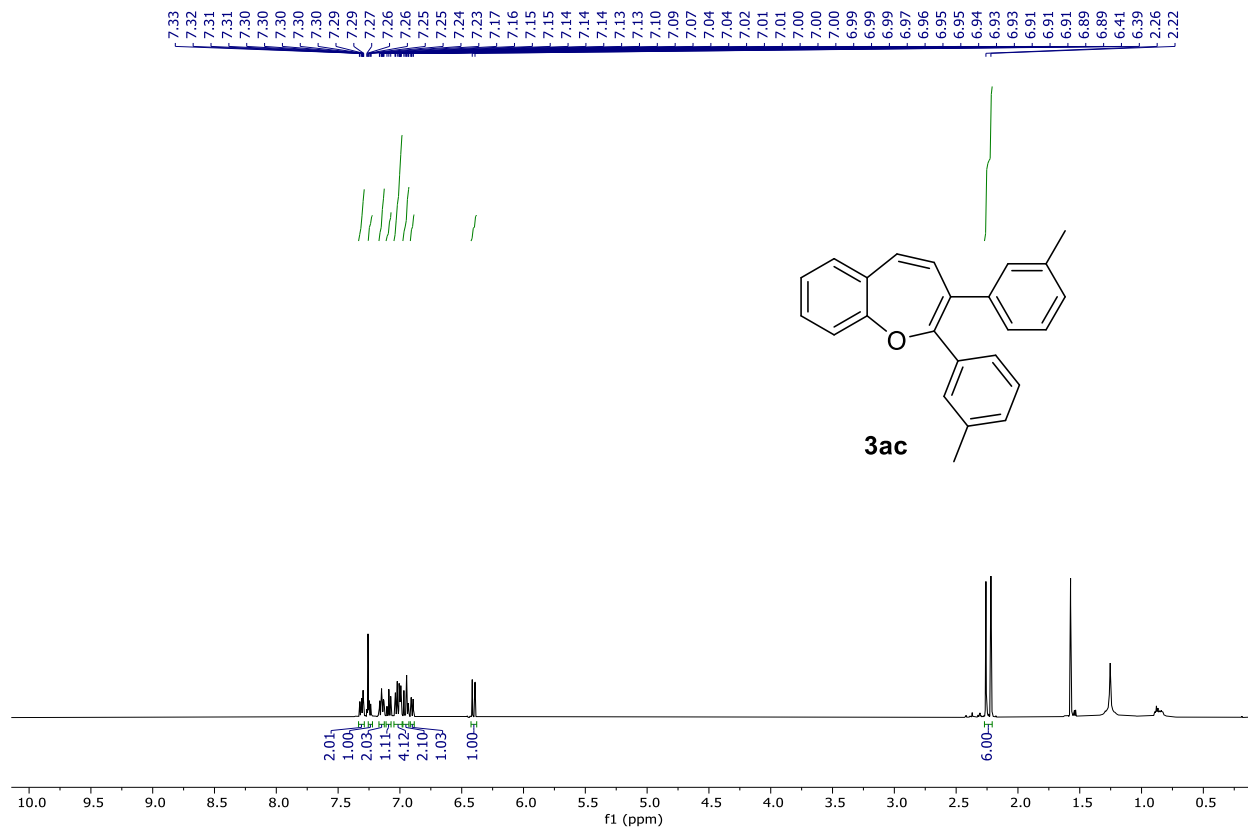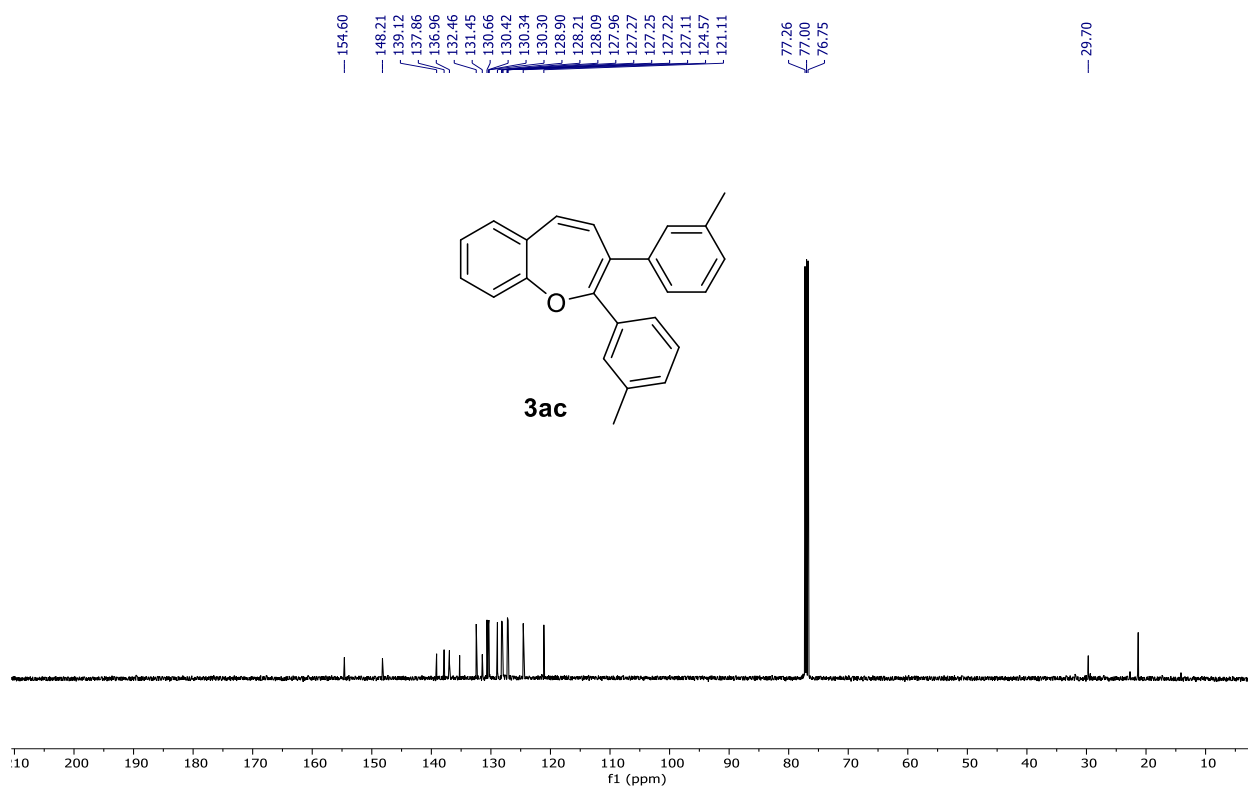

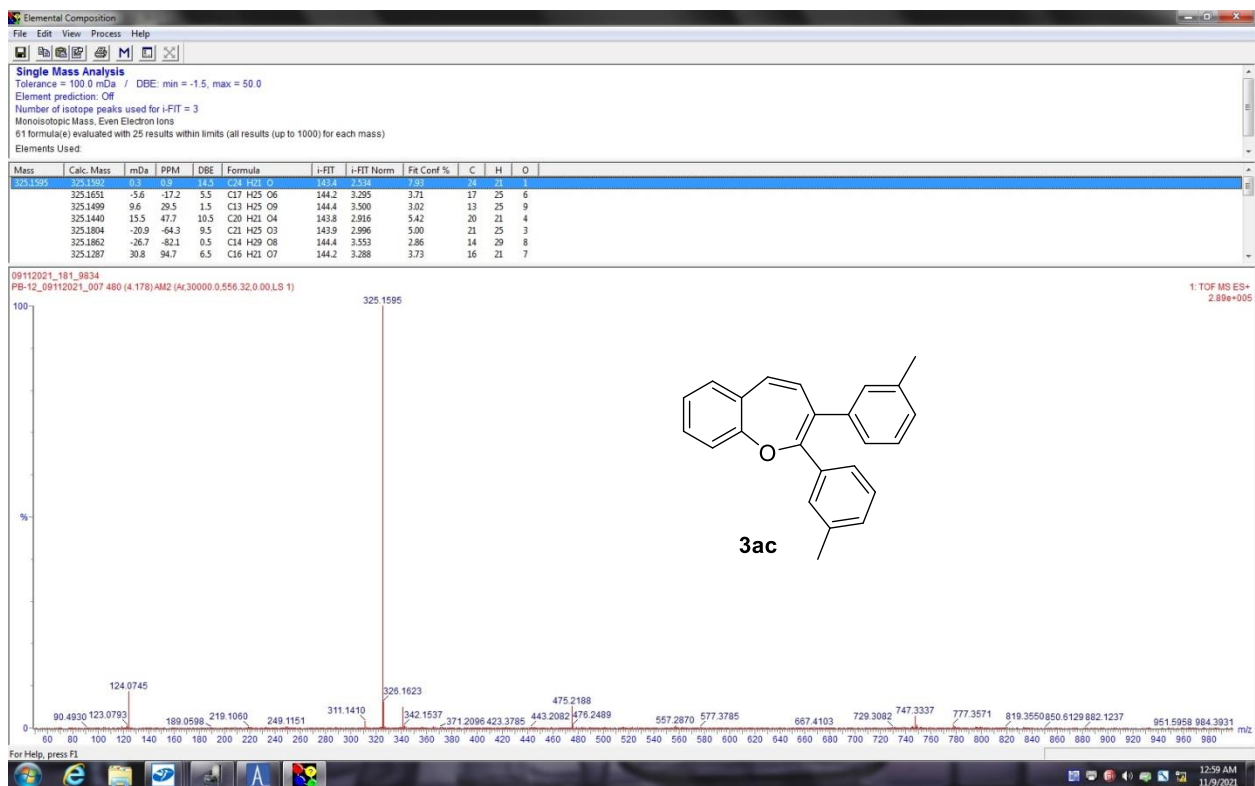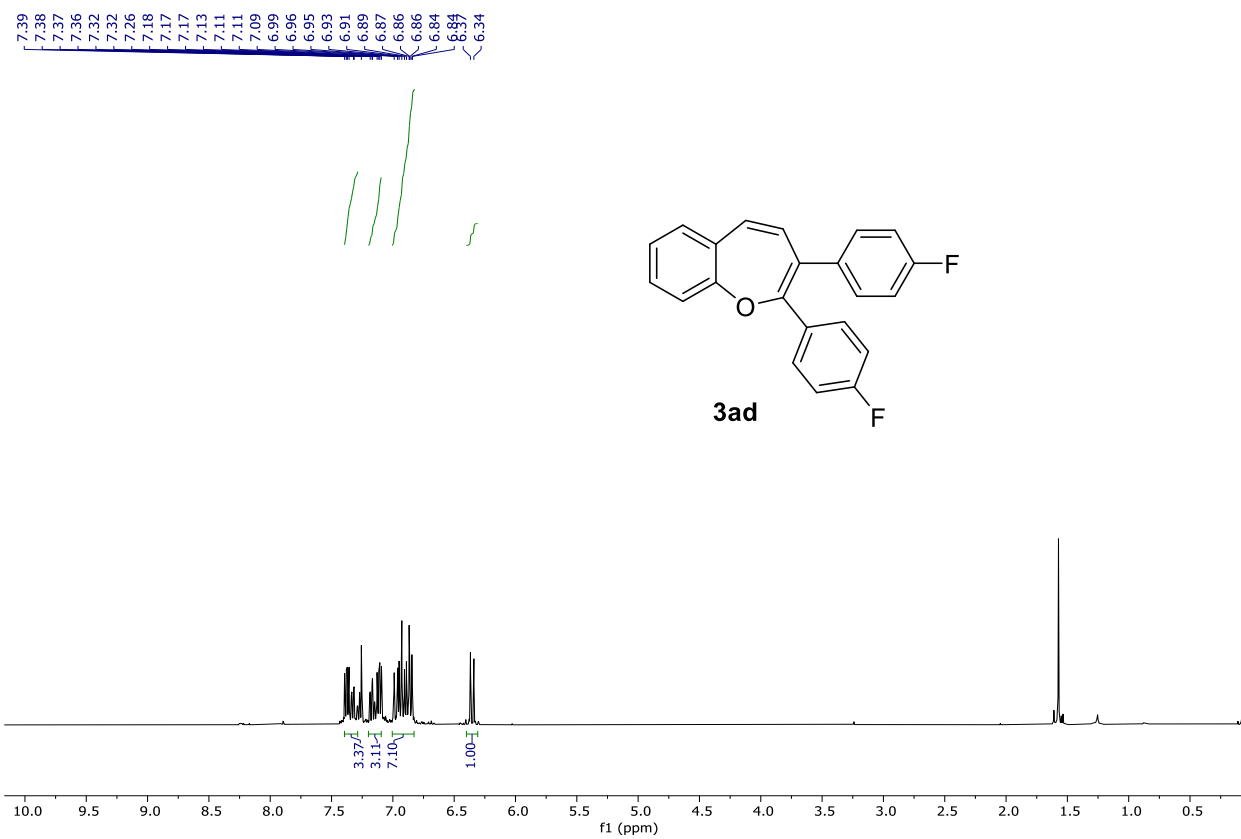

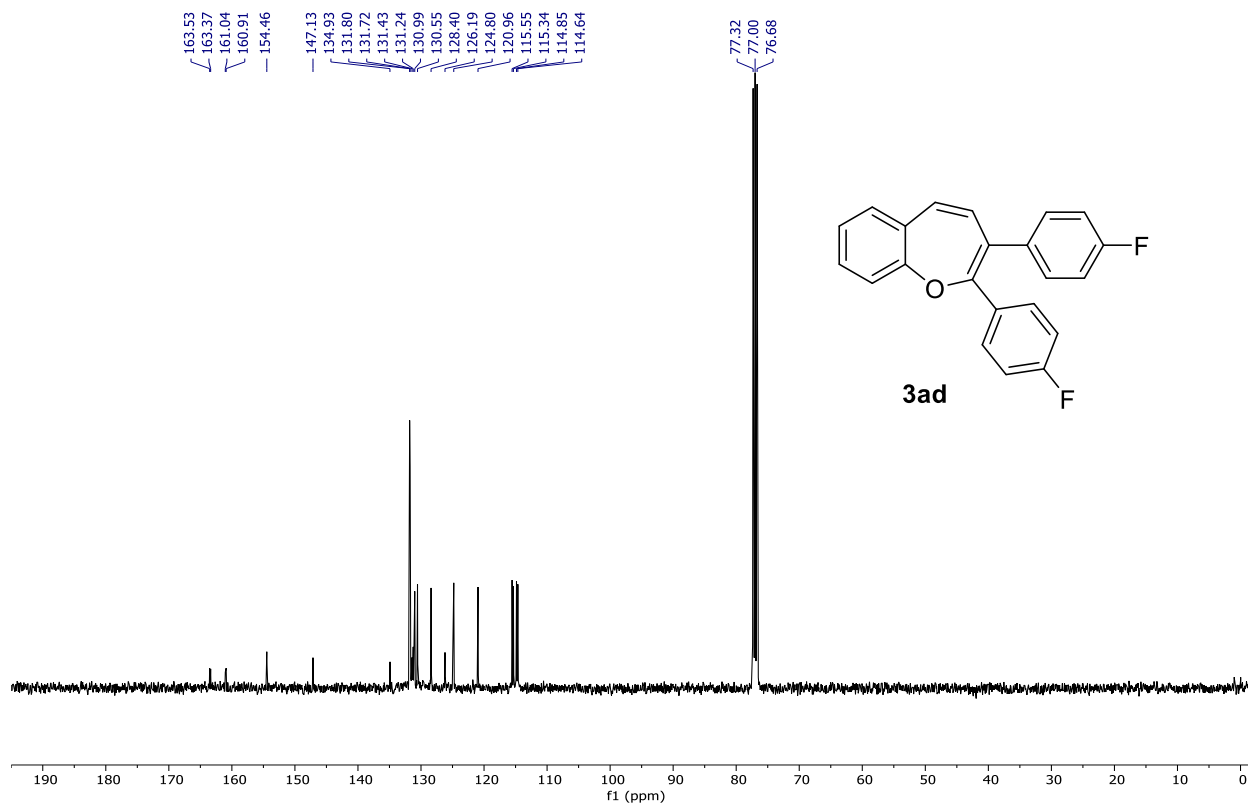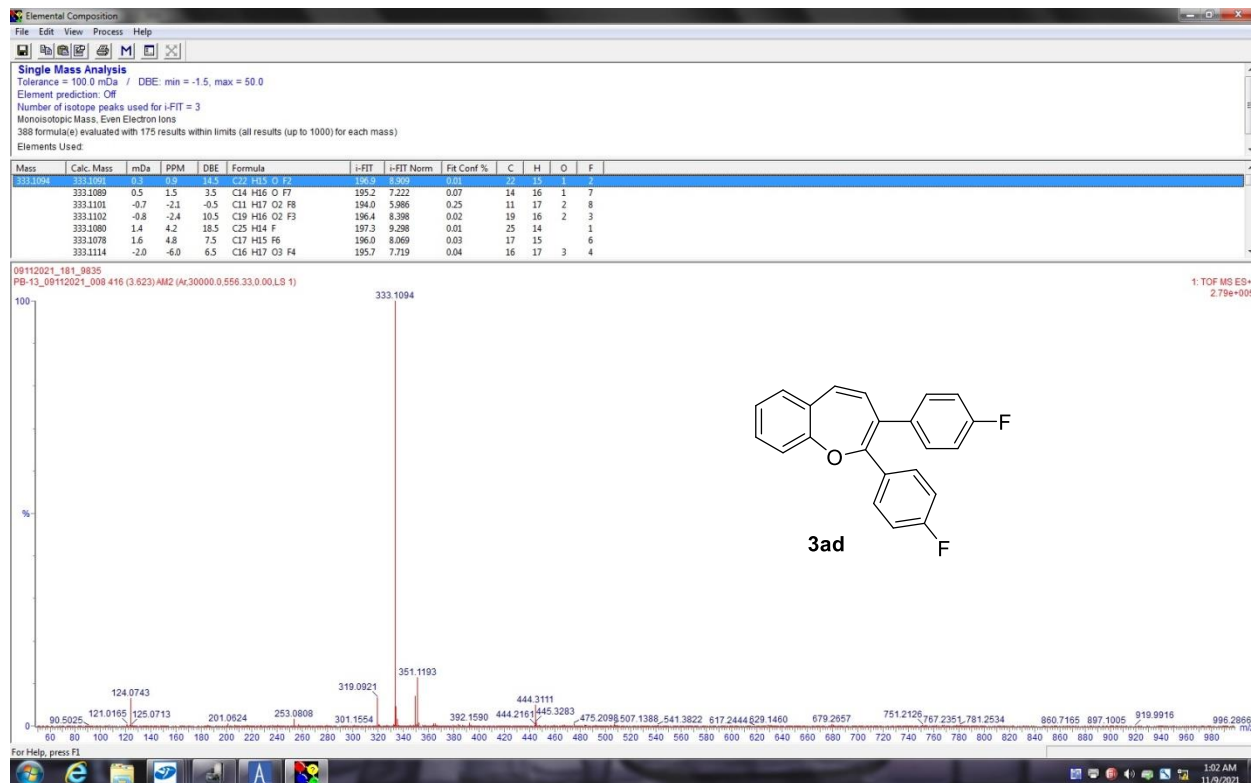

7.34  
7.34  
7.32  
7.32  
7.31  
7.31  
7.30  
7.29  
7.28  
7.27  
7.27  
7.26  
7.23  
7.23  
7.22  
7.21  
7.21  
7.20  
7.20  
7.19  
7.19  
7.18  
7.18  
7.17  
7.16  
7.16  
7.16  
7.15  
7.15  
7.14  
7.14  
7.13  
7.12  
7.11  
7.11  
7.10  
7.10  
7.01  
6.98  
6.95  
6.95  
6.95  
6.94  
6.93  
6.93  
6.92  
6.92  
6.91  
6.91  
6.90  
6.89  
6.88  
6.87  
6.86  
6.86  
6.37  
6.34

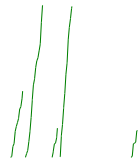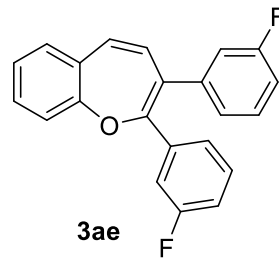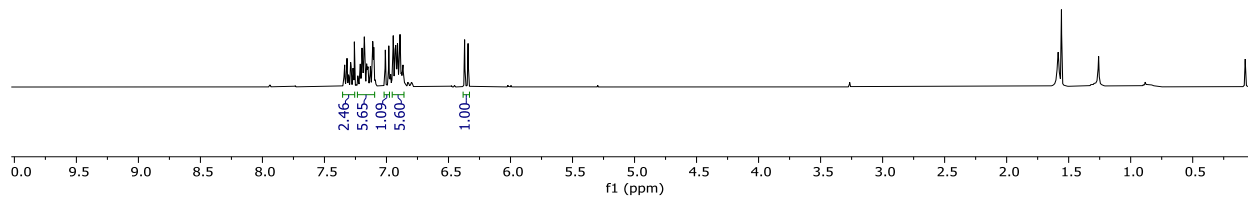

163.92  
163.37  
161.47  
160.93  
154.55  
147.11  
140.94  
140.86  
137.23  
137.15  
131.61  
131.34  
131.11  
130.73  
130.01  
129.93  
129.16  
129.08  
128.51  
127.24  
125.84  
125.81  
125.66  
125.64  
124.95  
123.38  
120.97  
116.99  
116.77  
116.33  
115.59  
115.38  
114.71  
114.50  
77.32  
77.00  
76.68

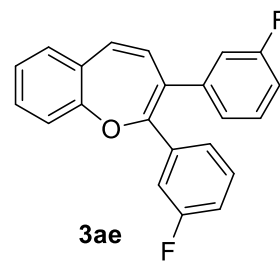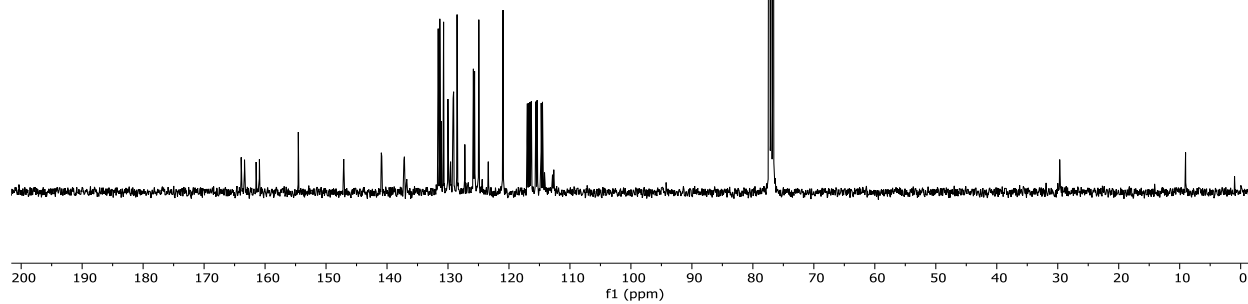

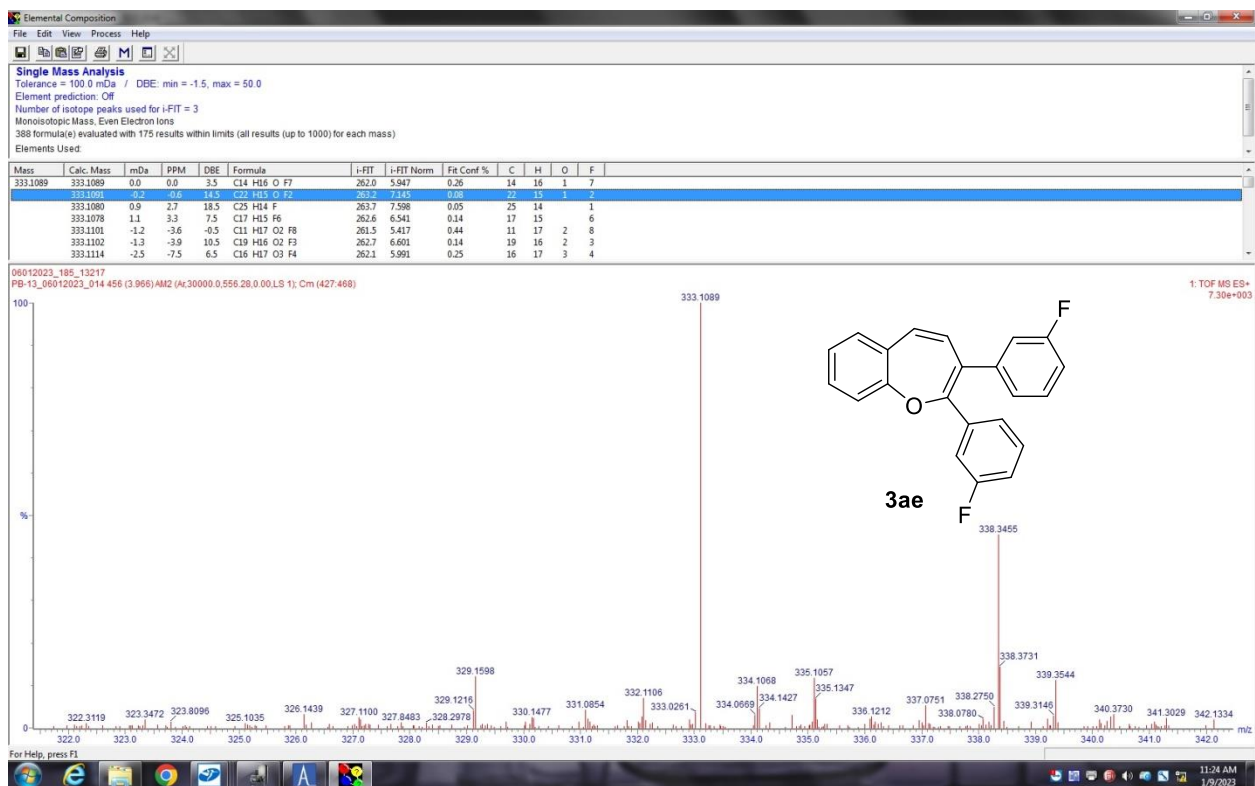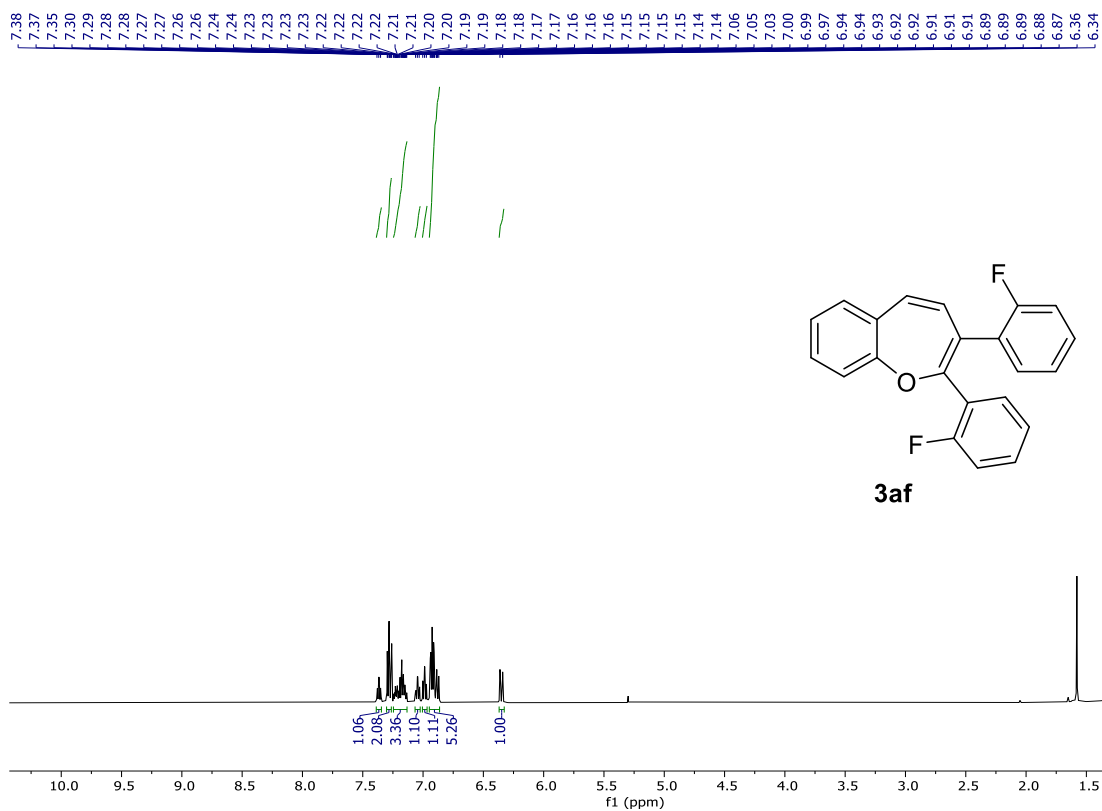



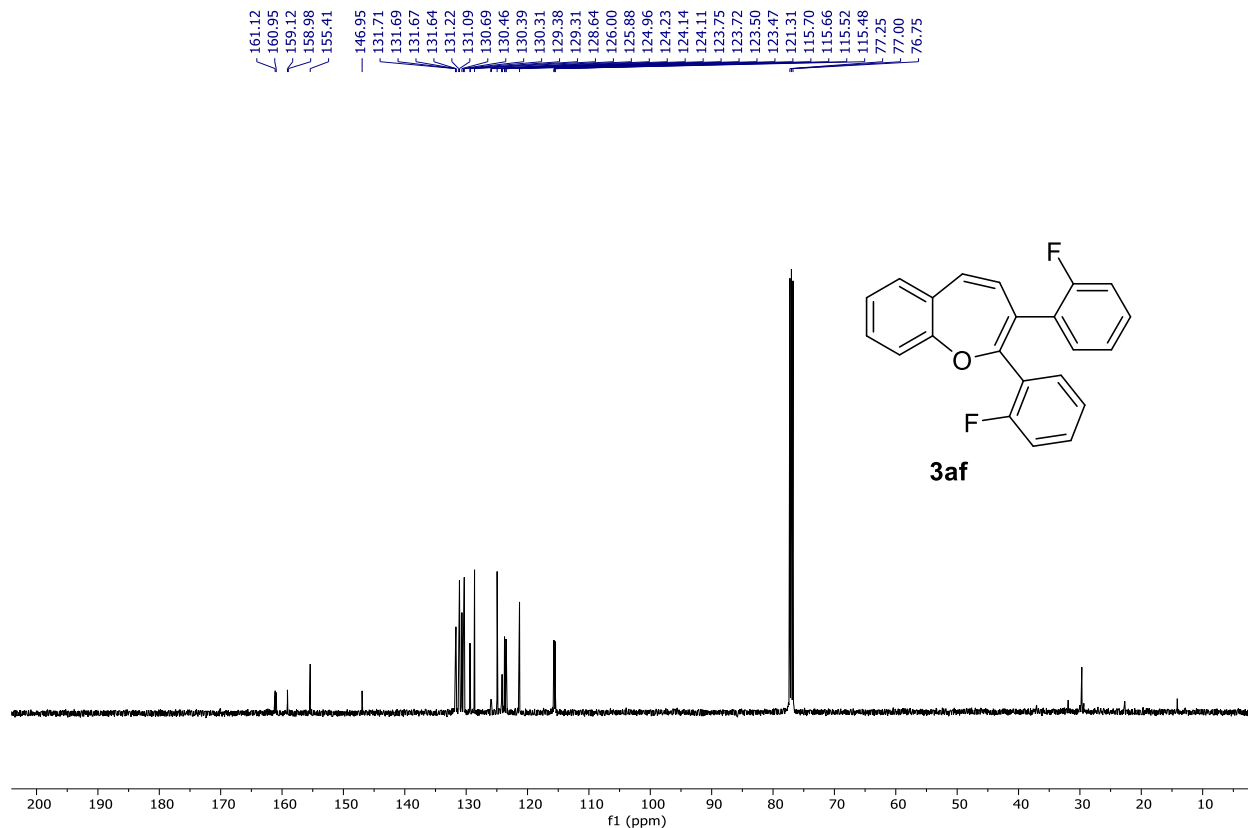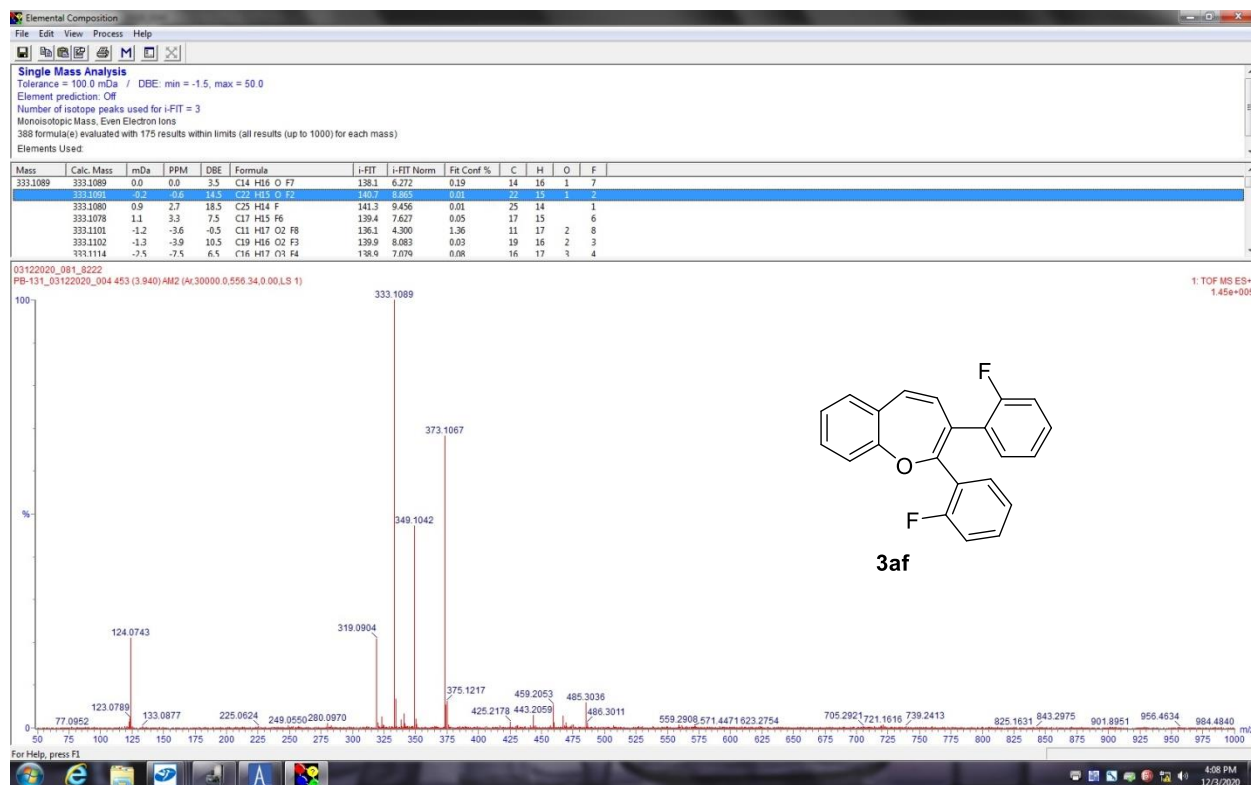

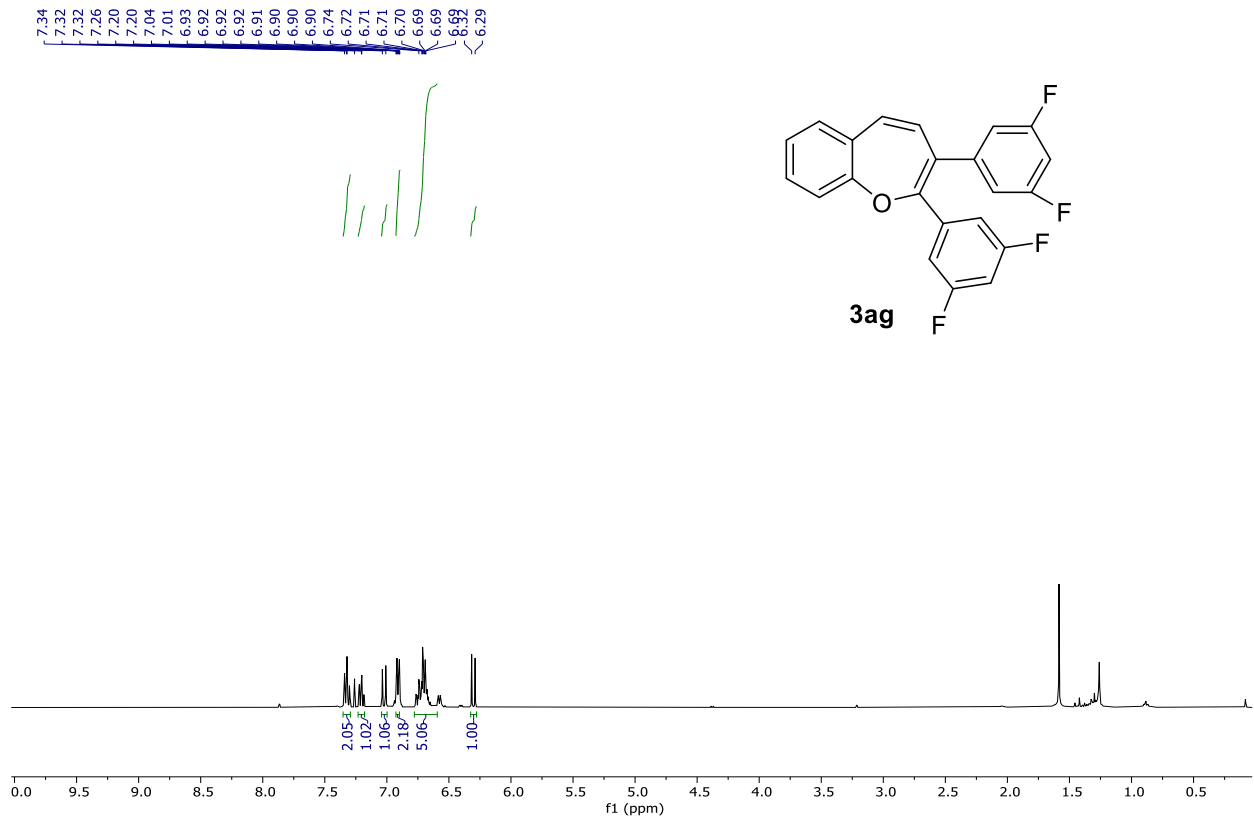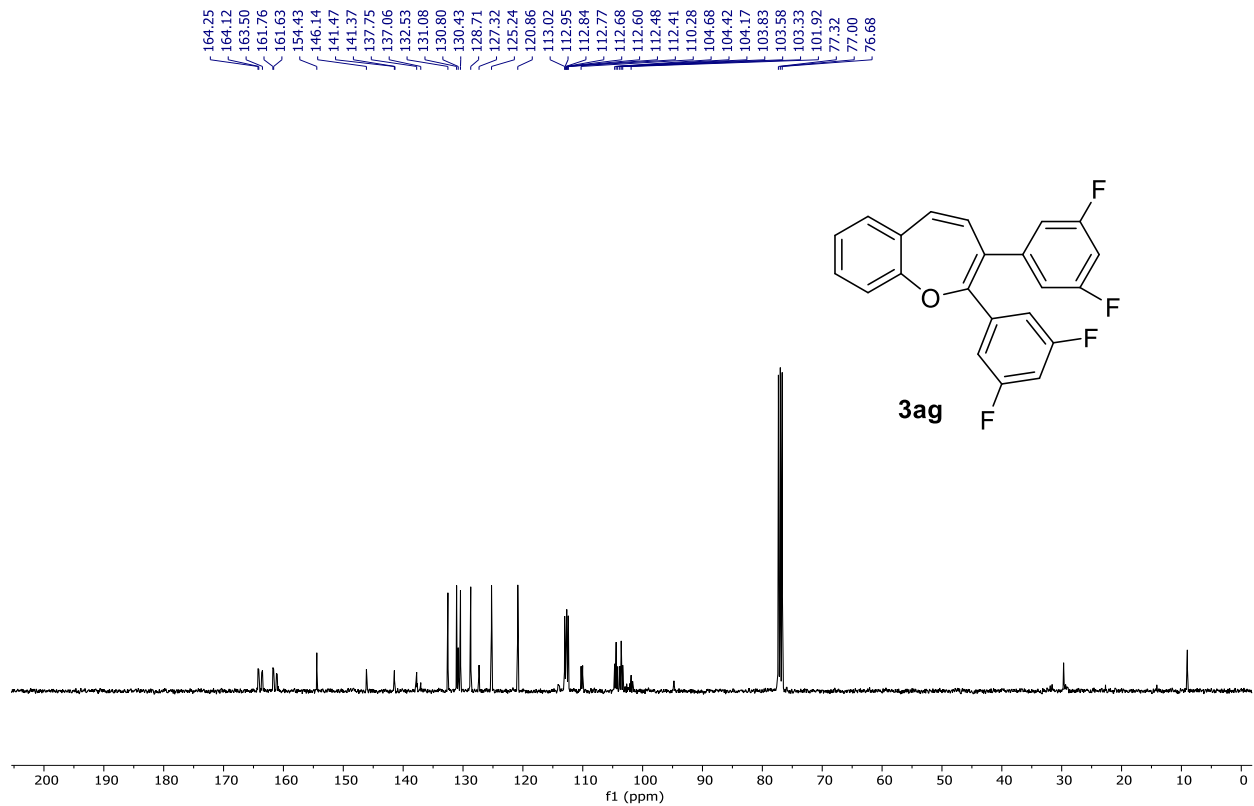

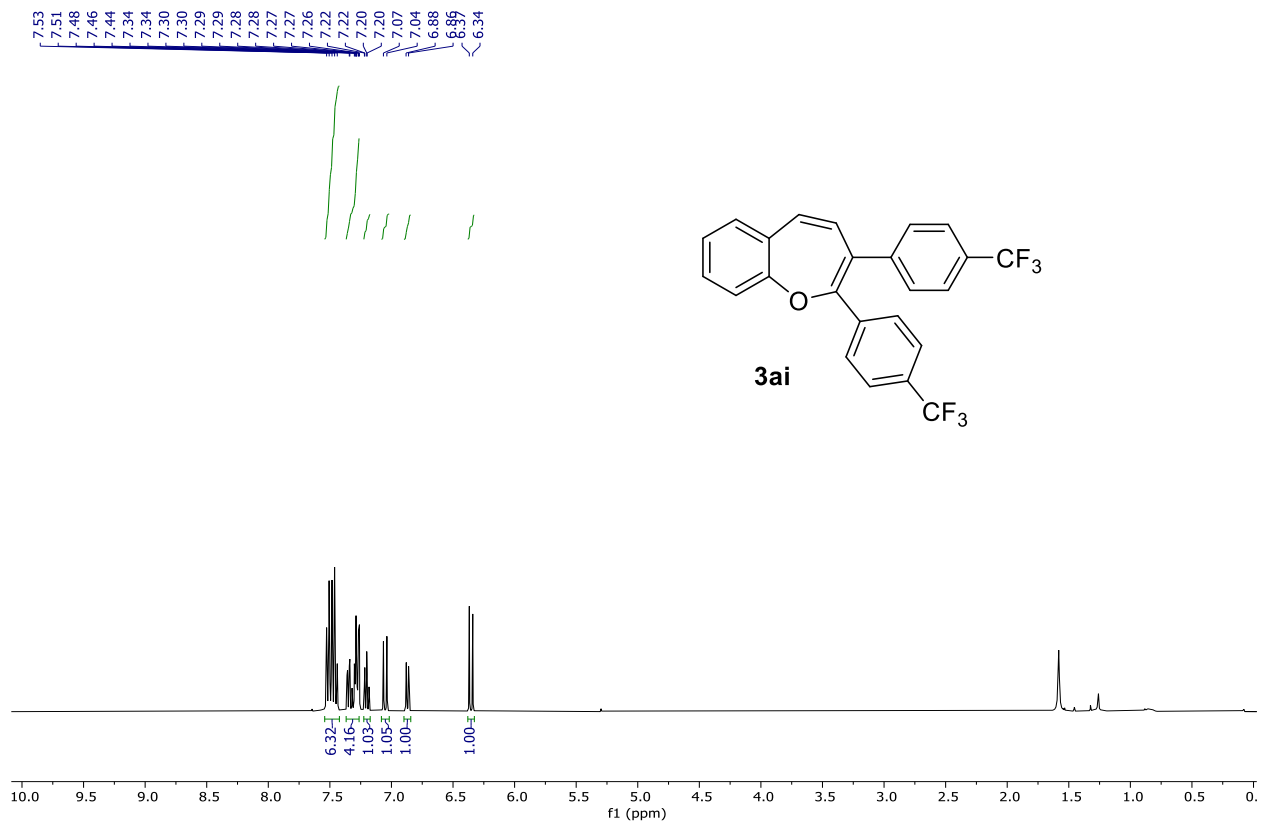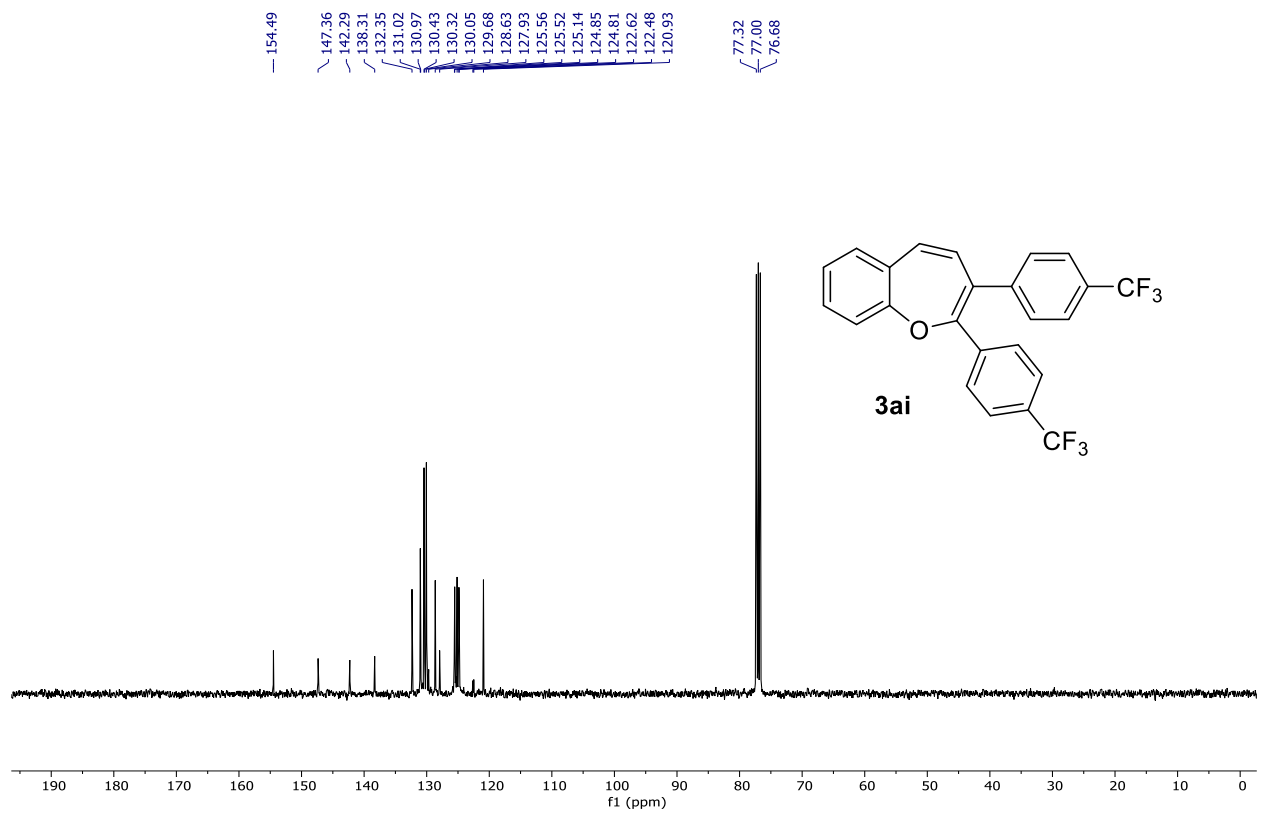

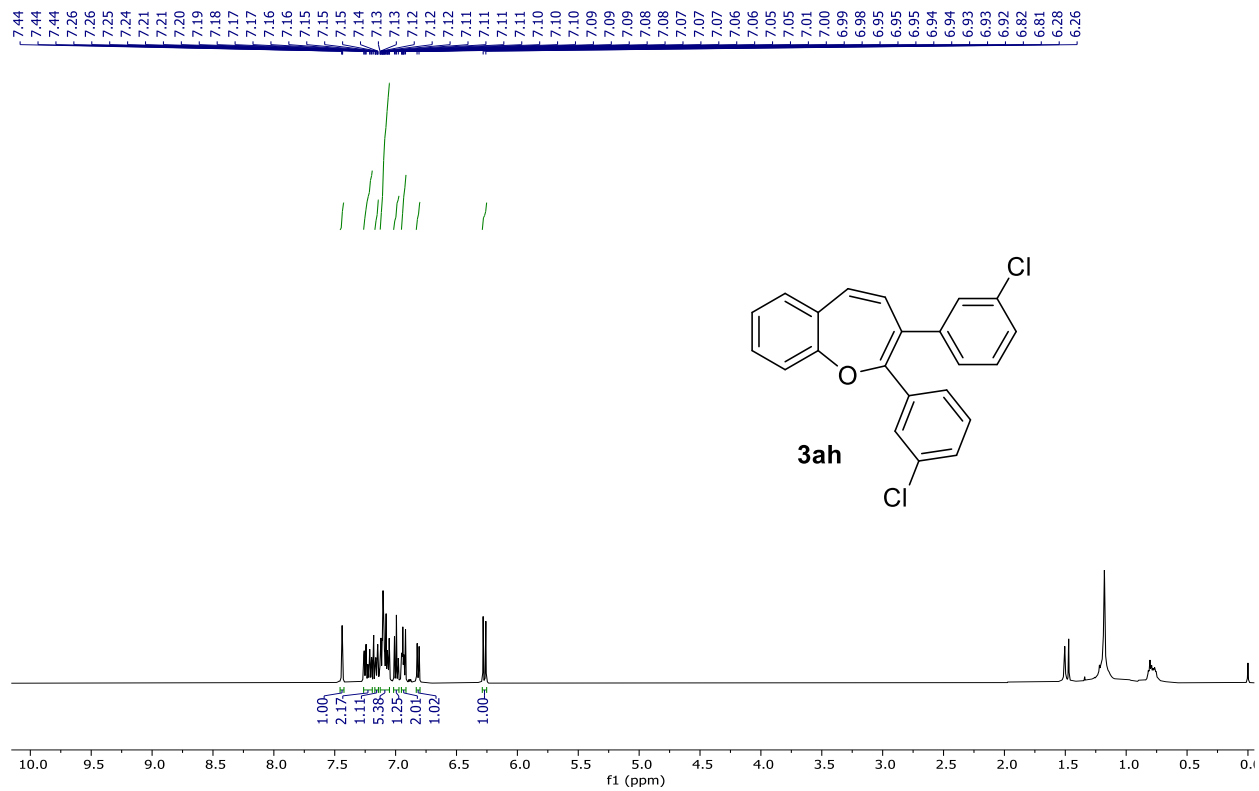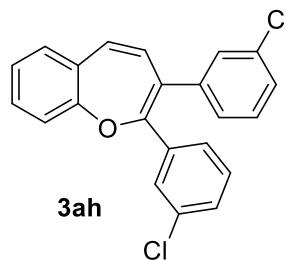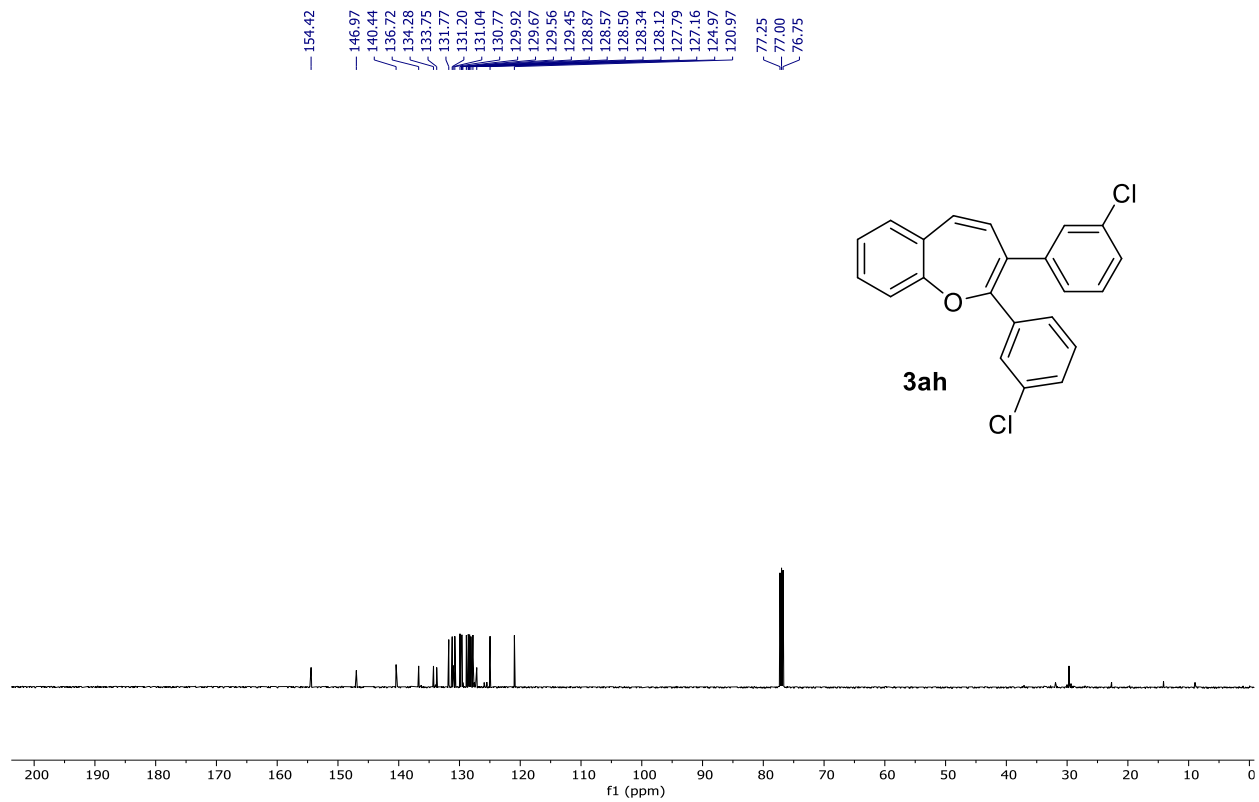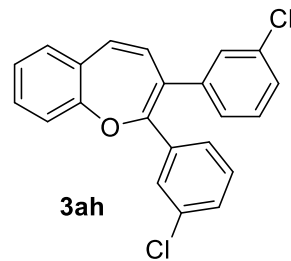

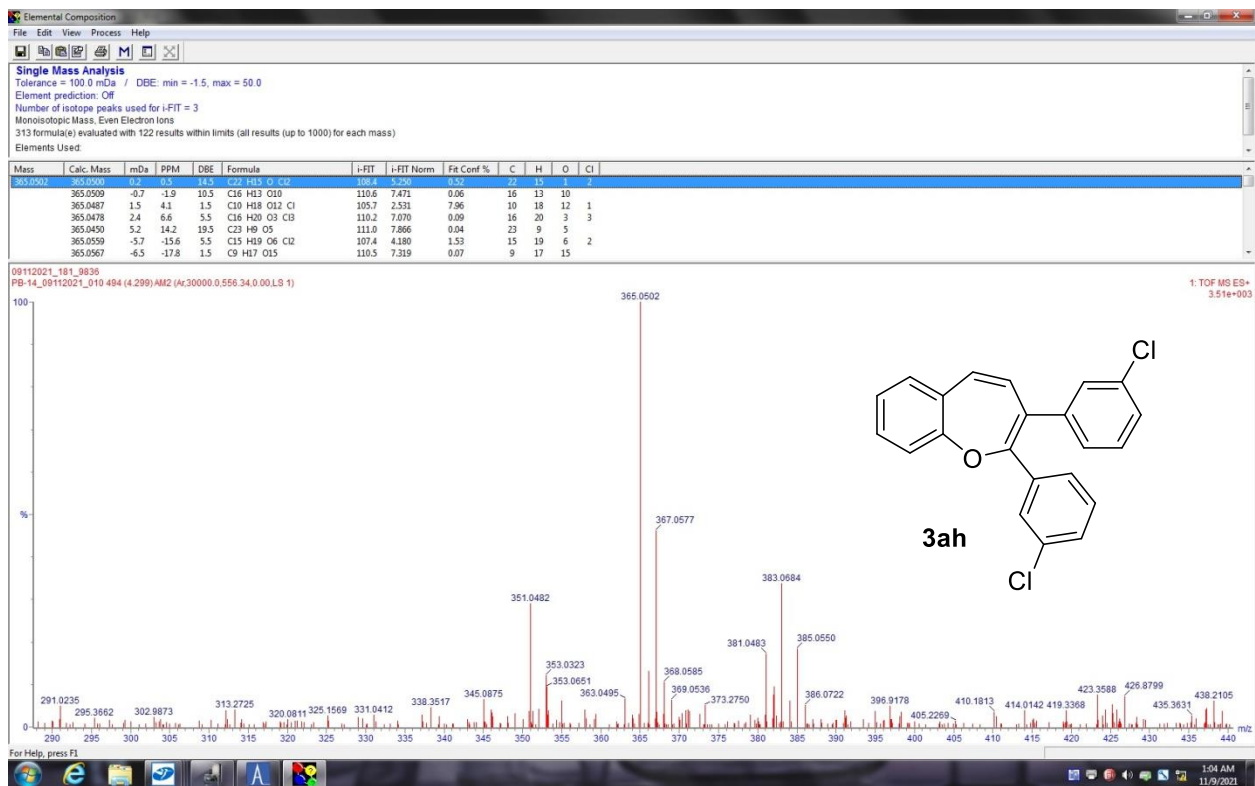

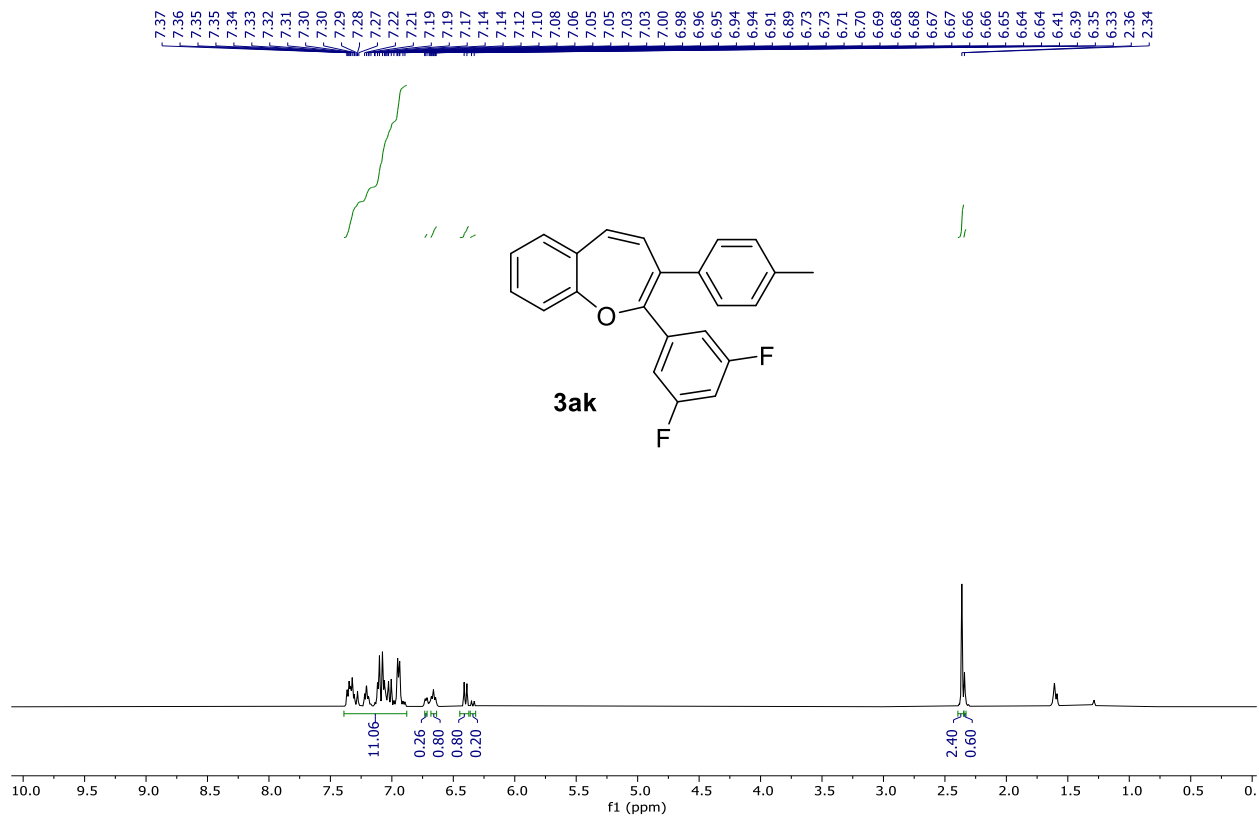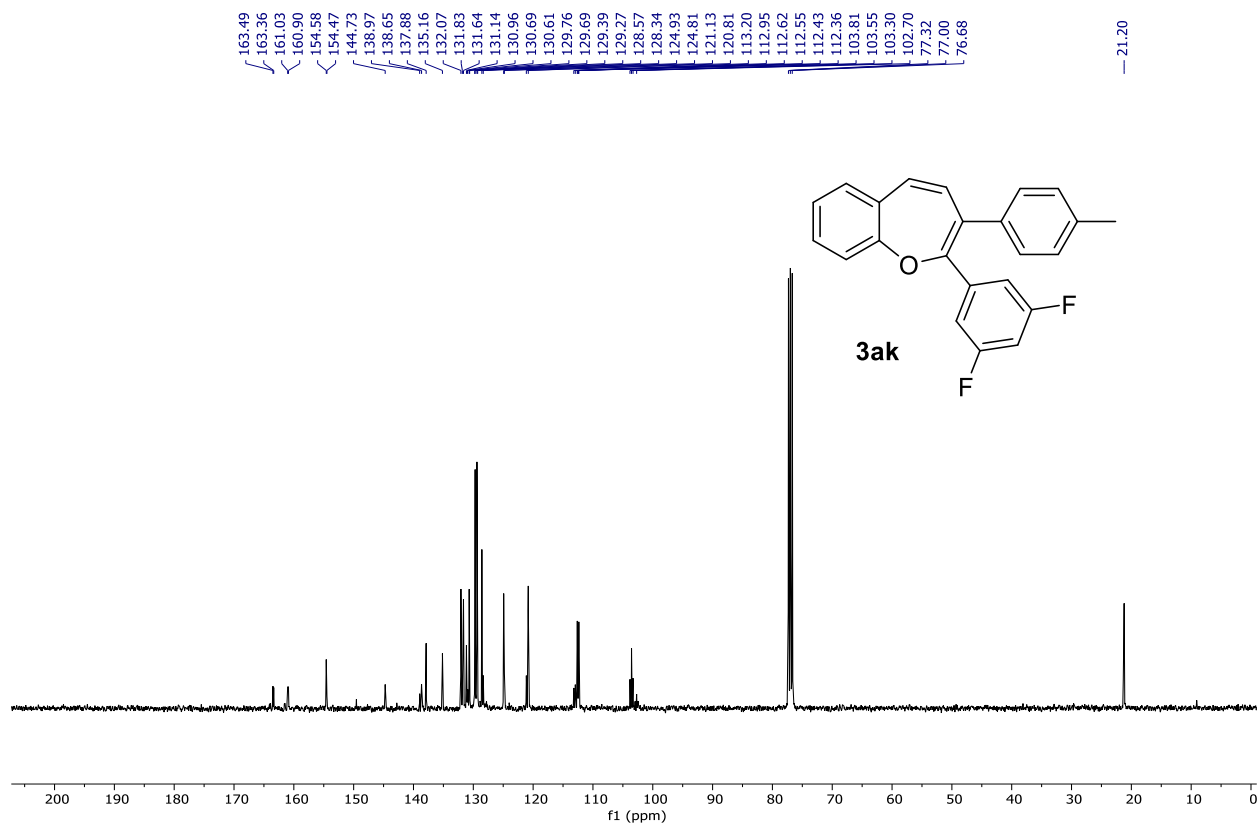

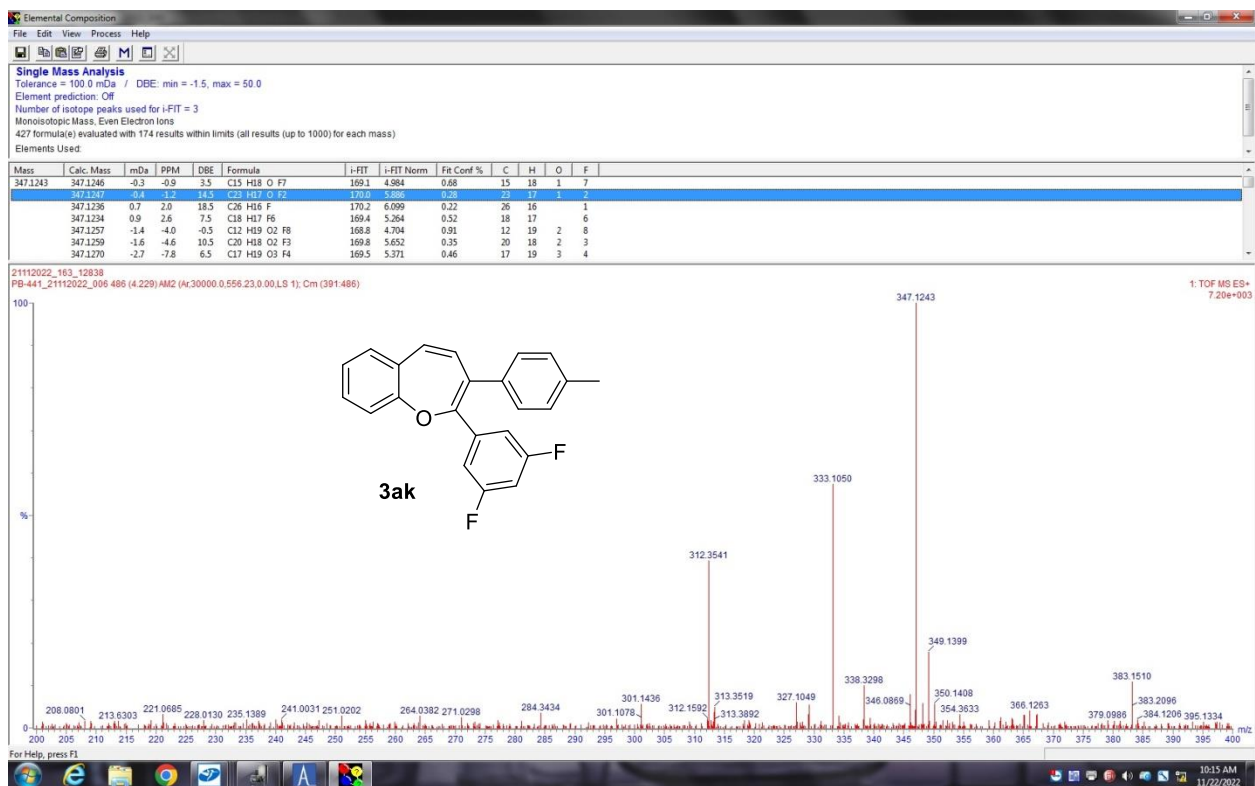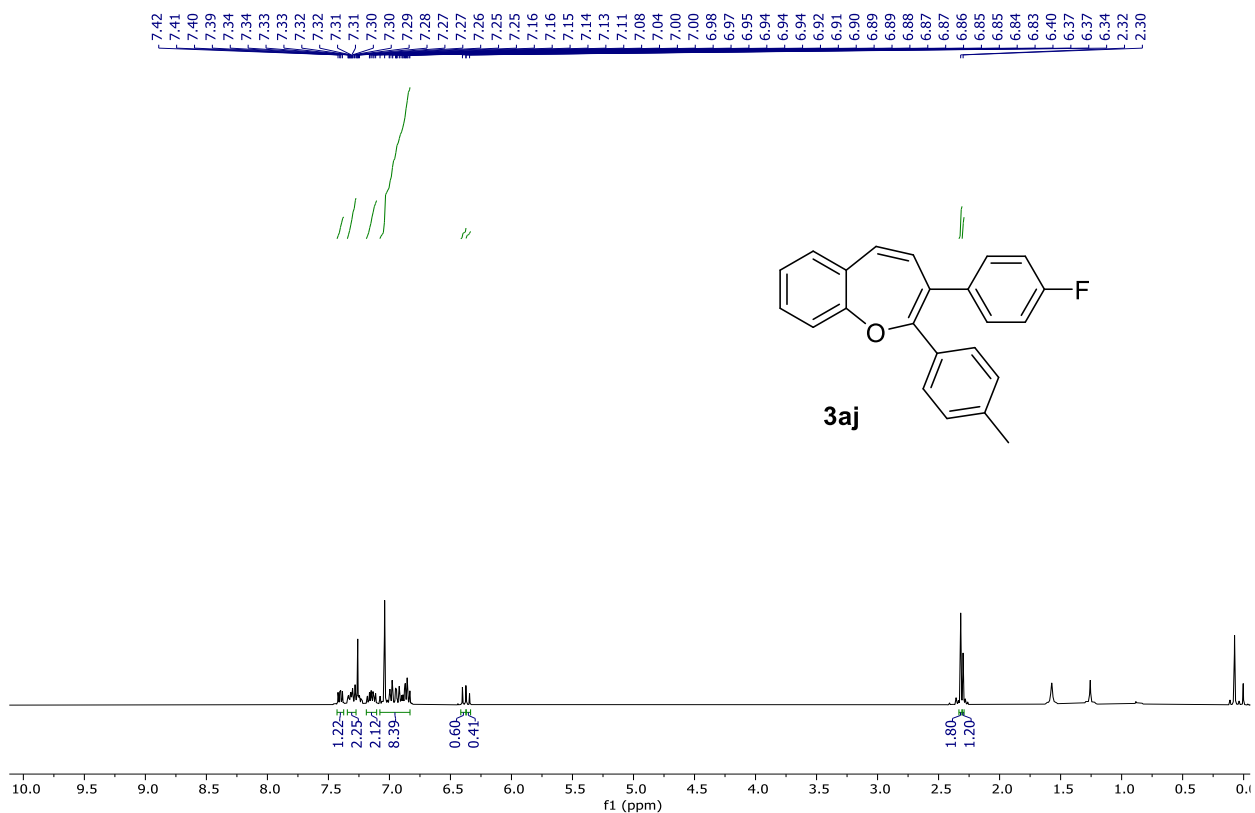

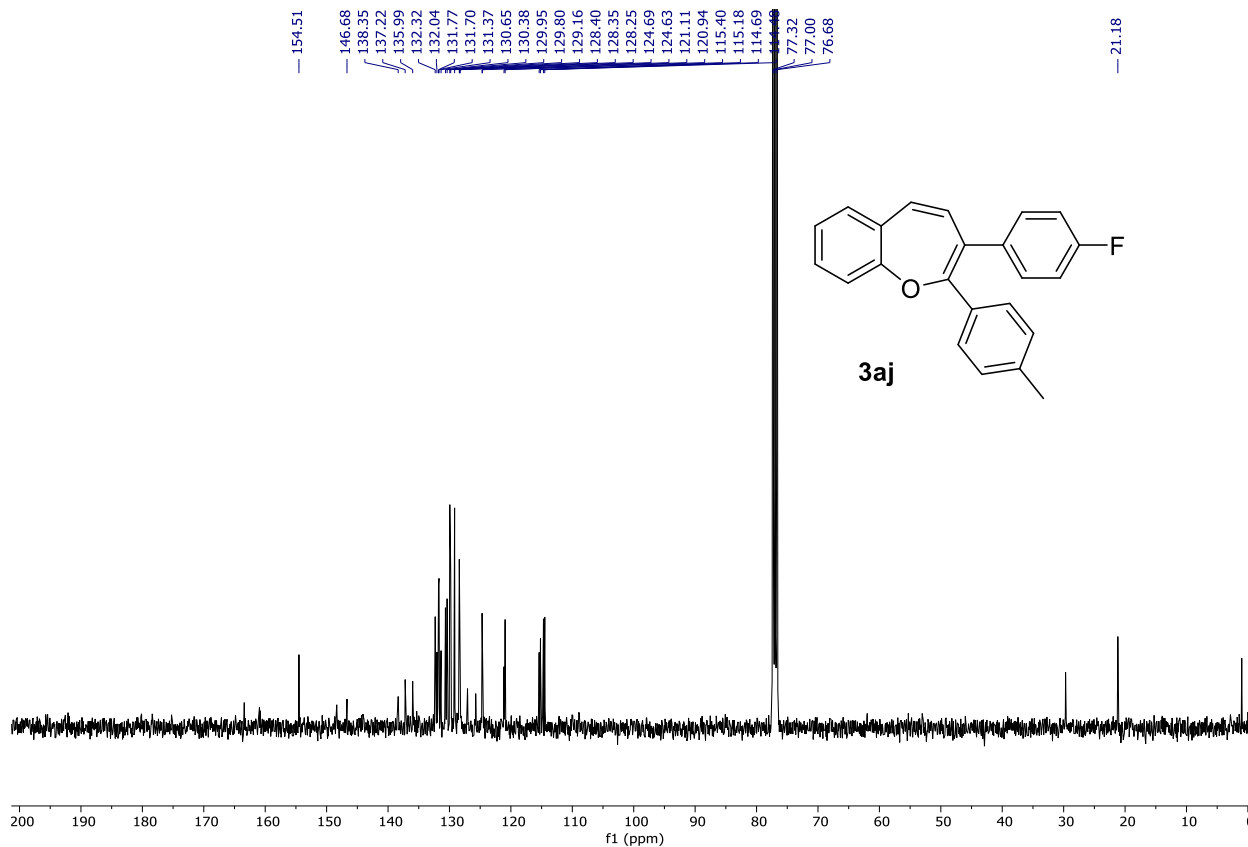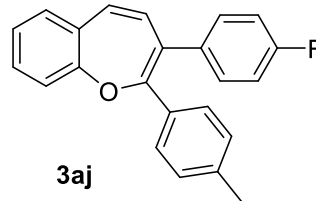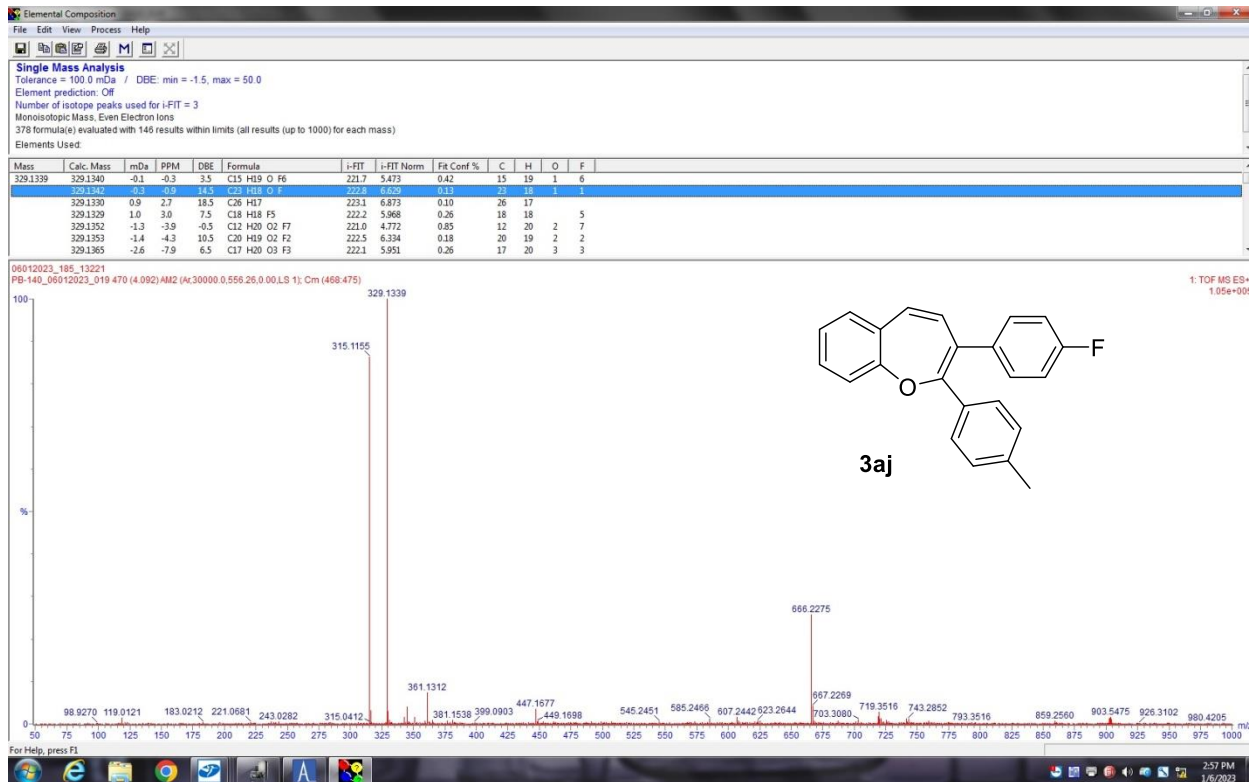



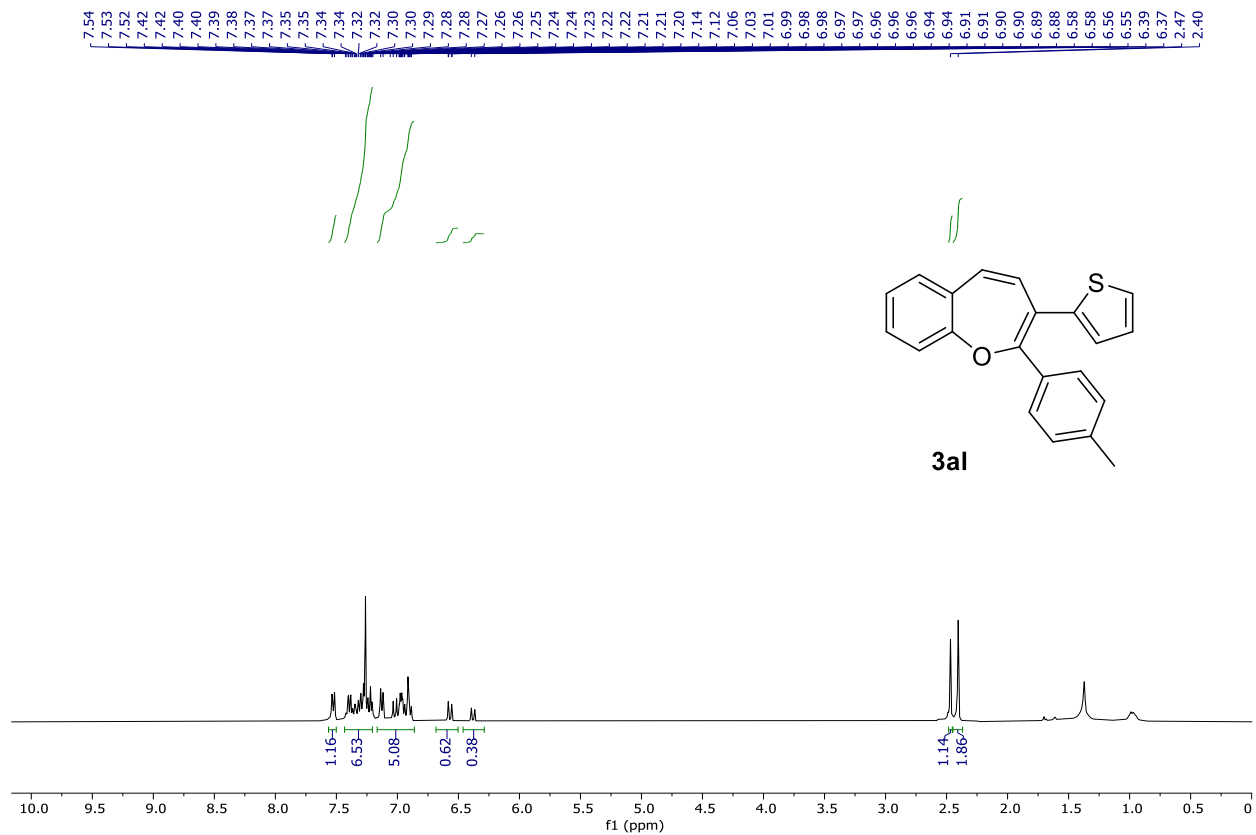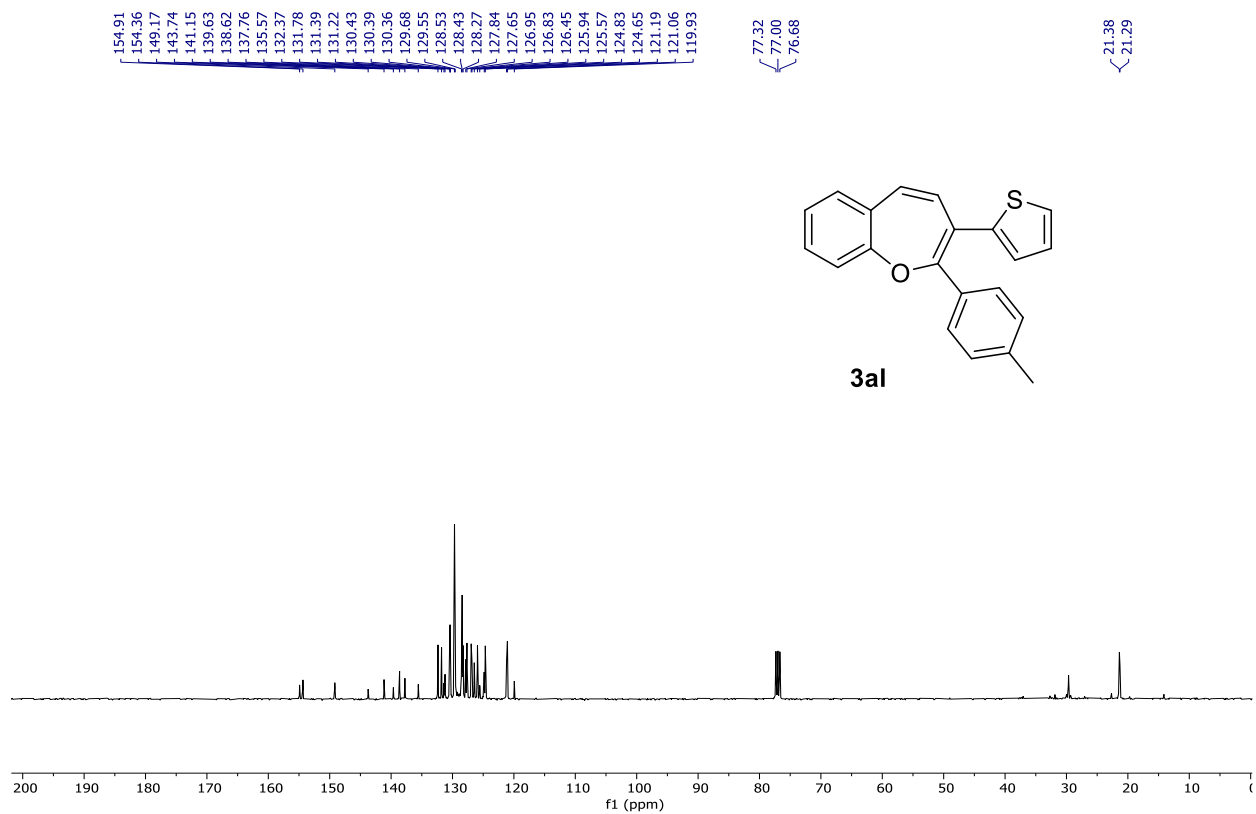

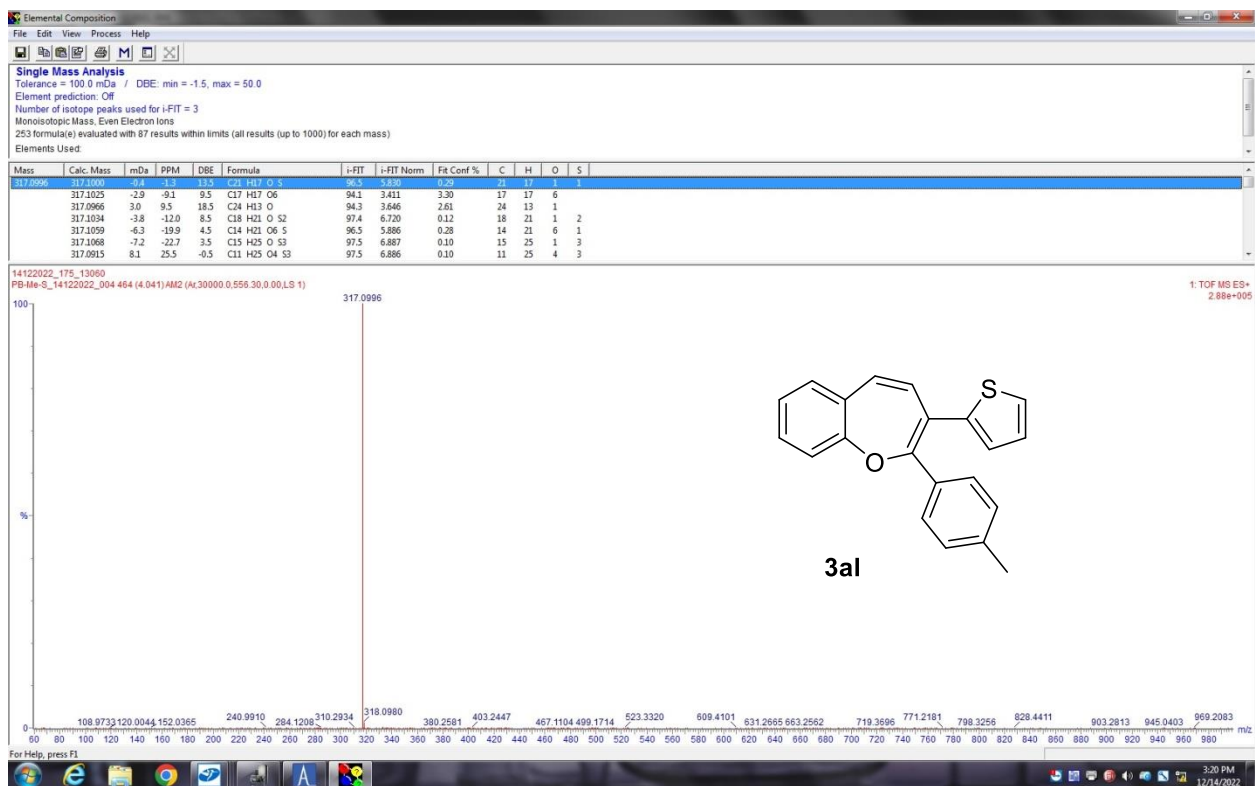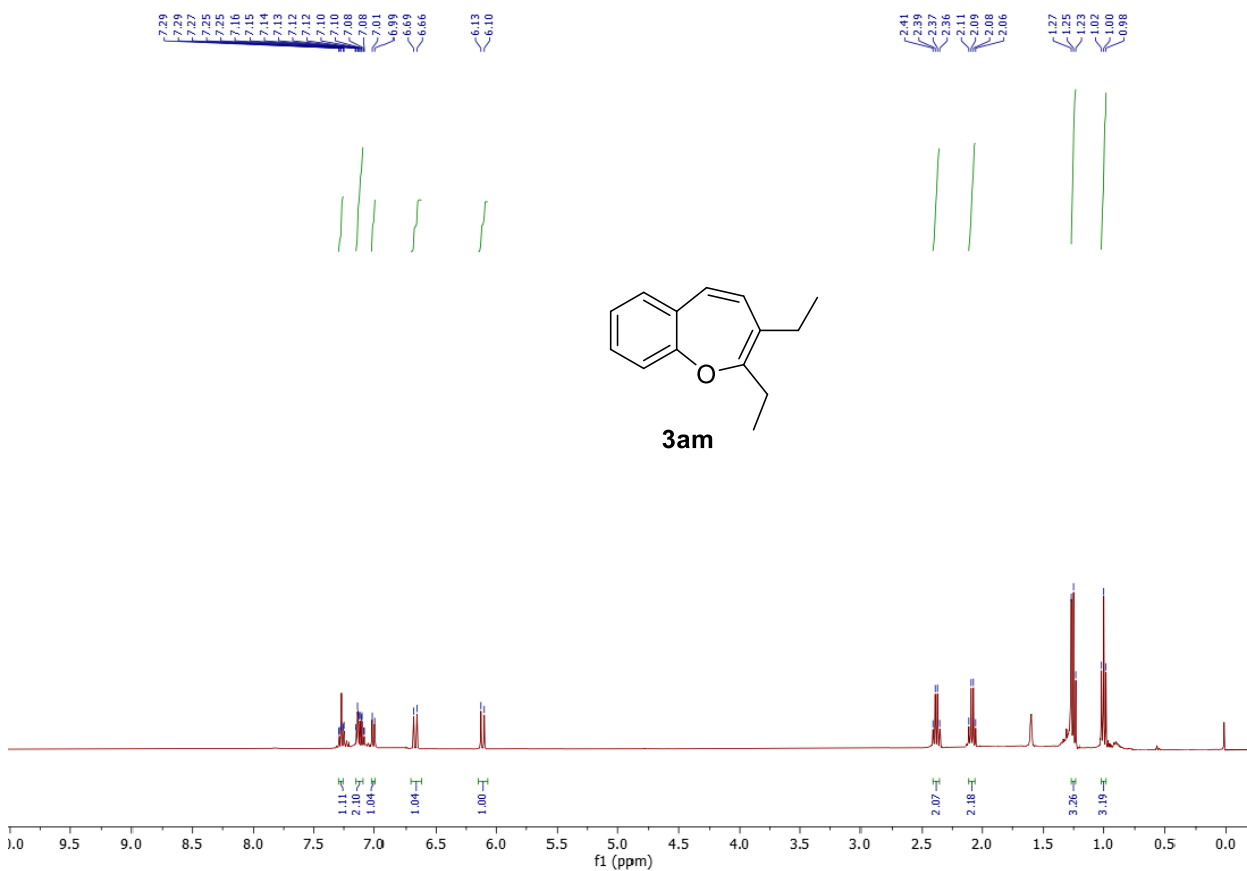

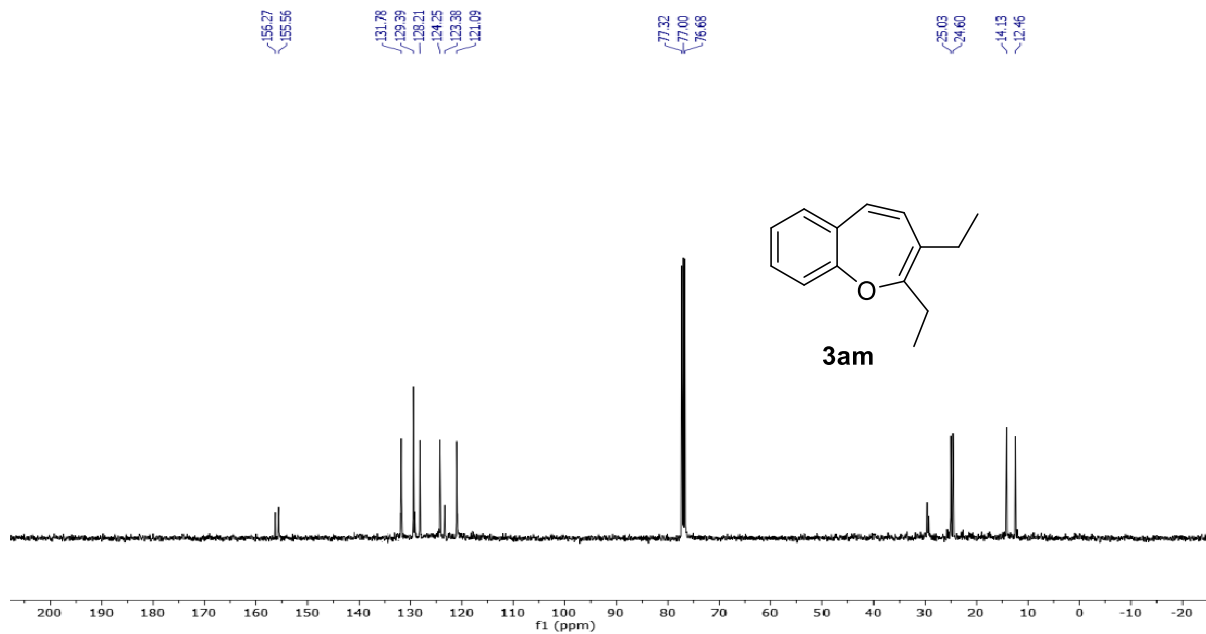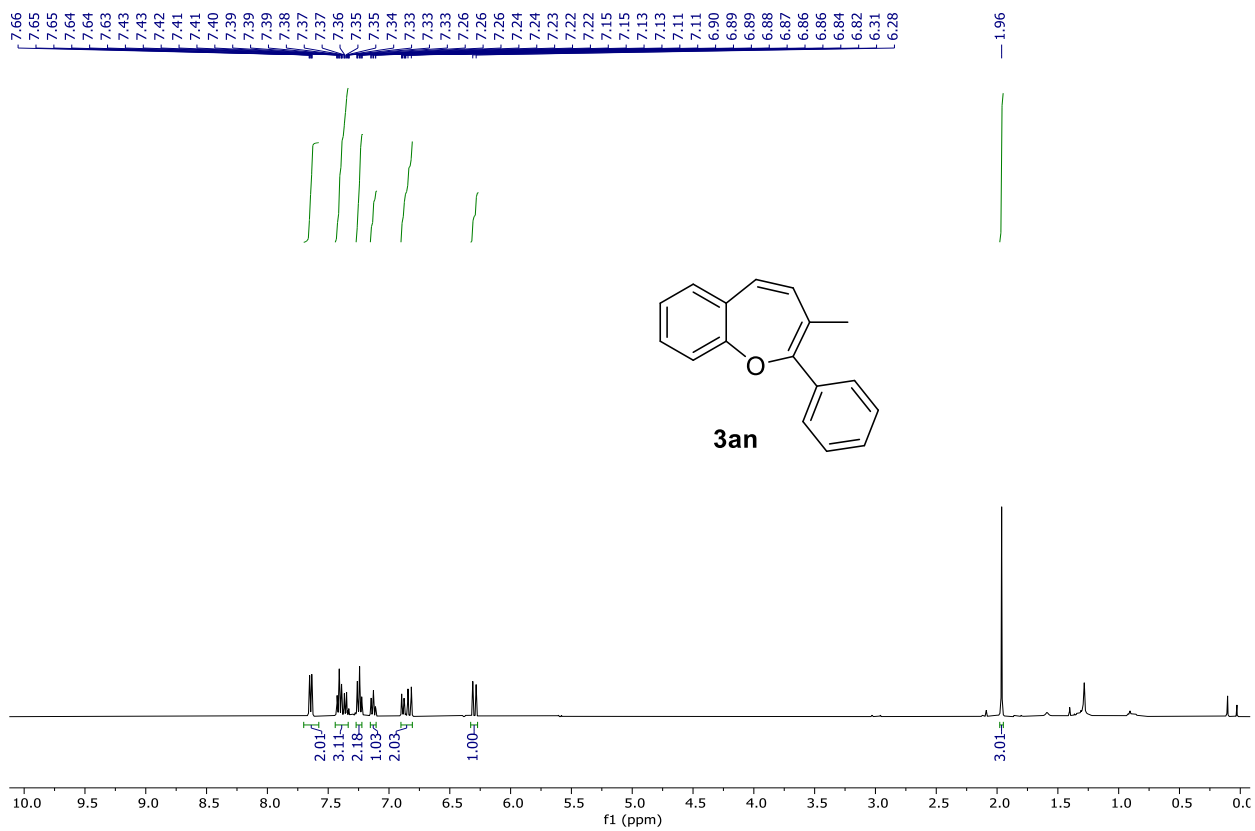

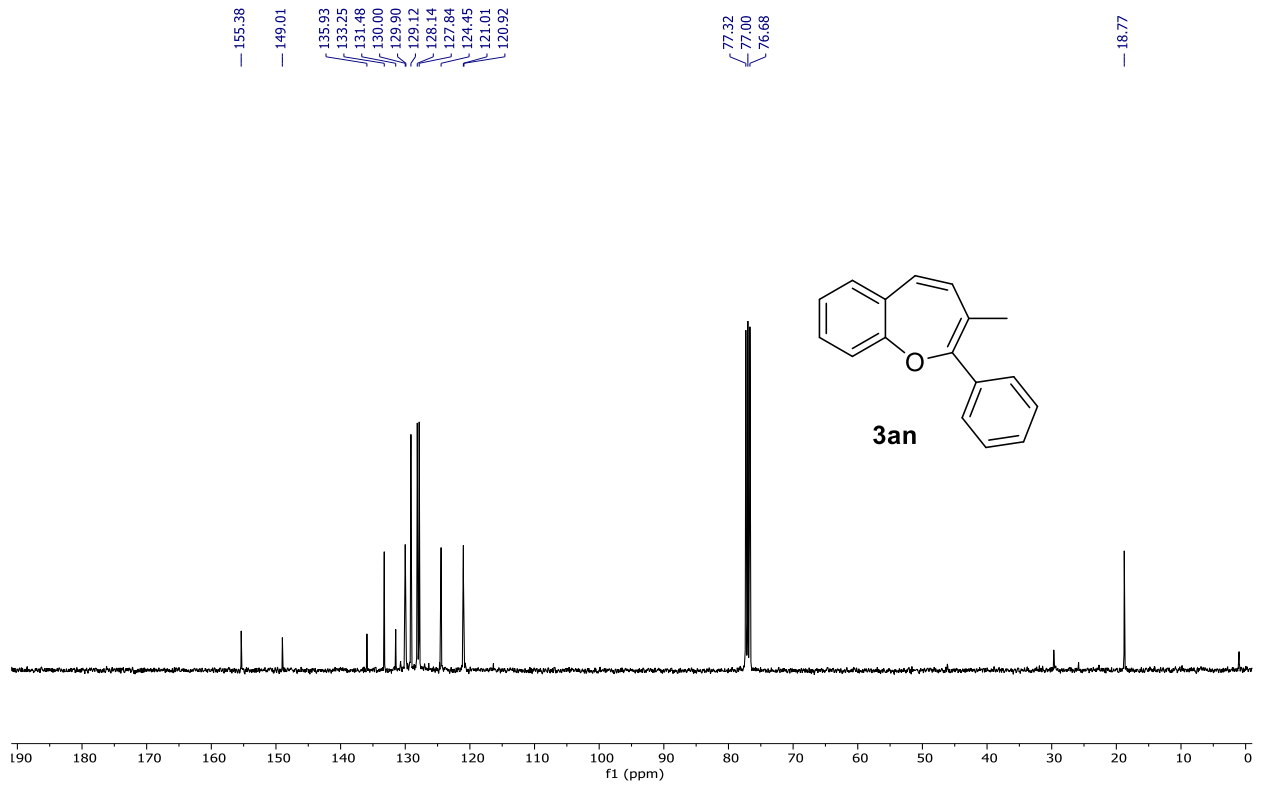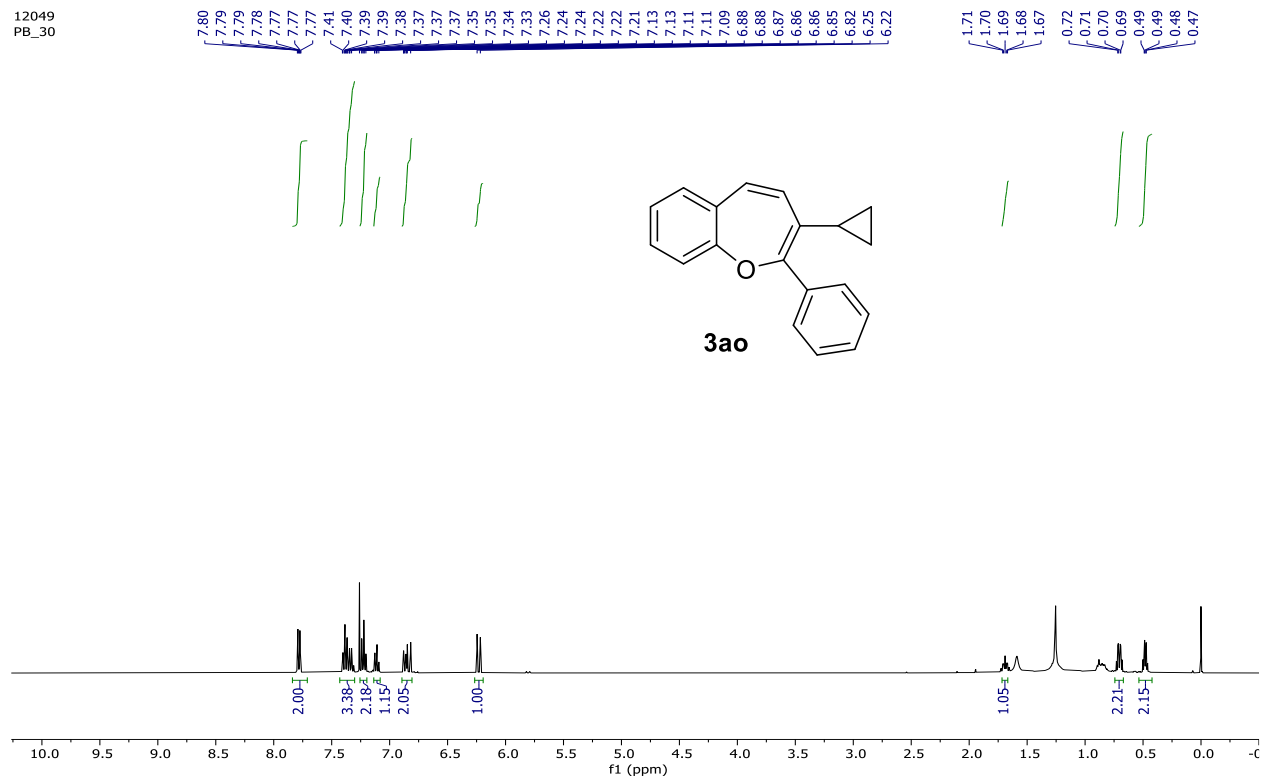

12034  
PB\_30

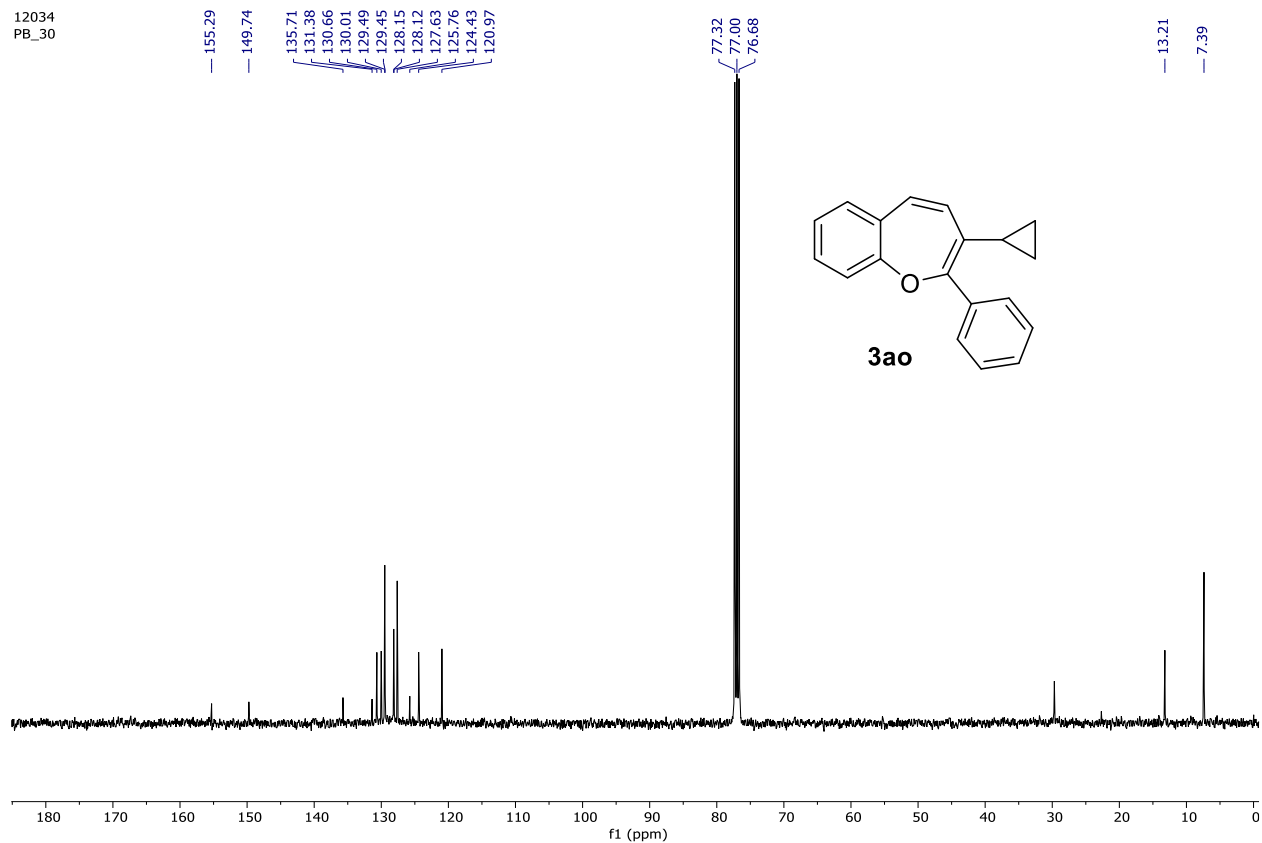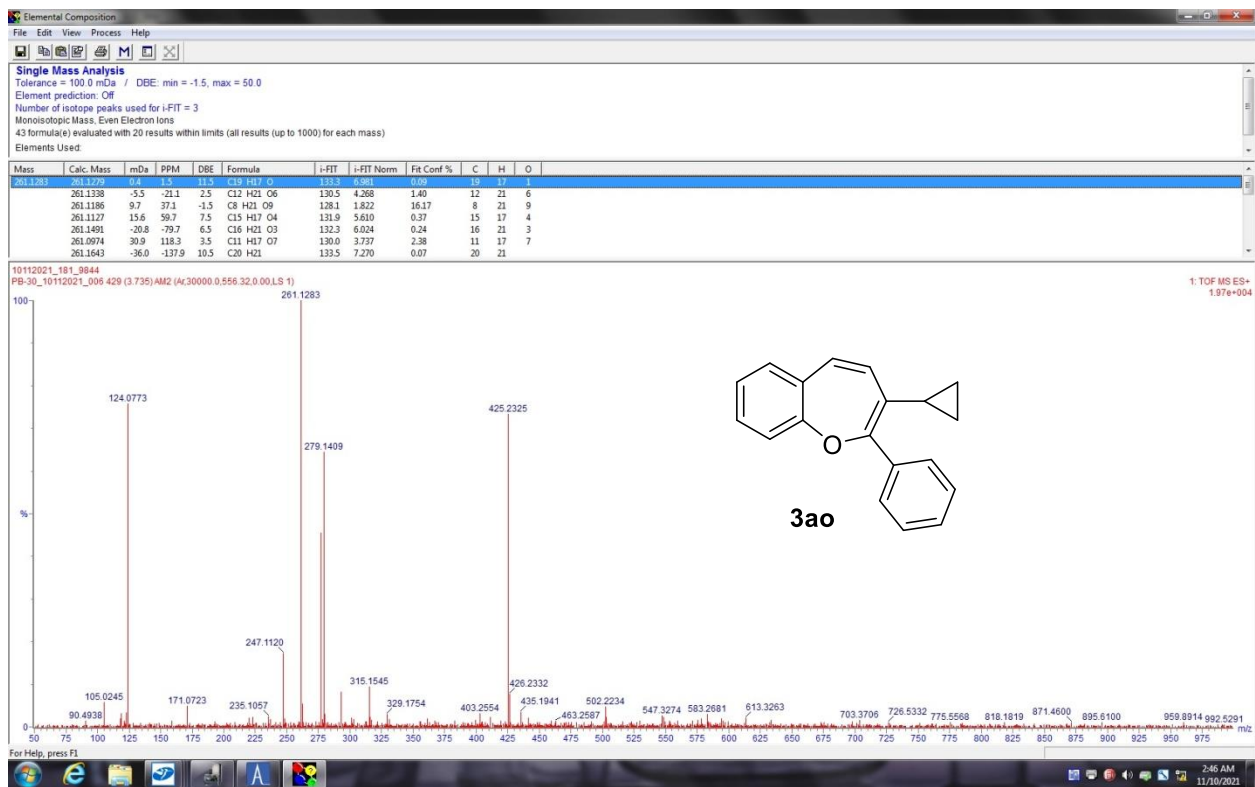

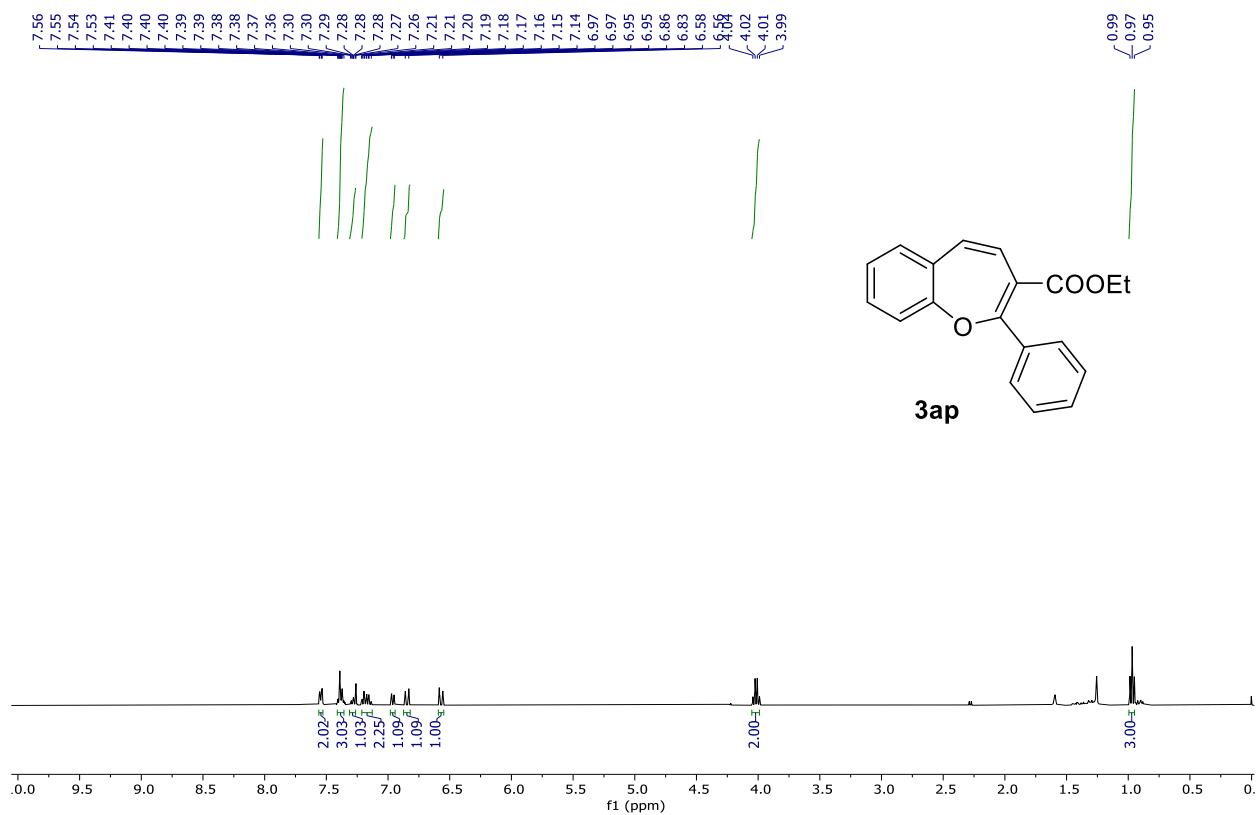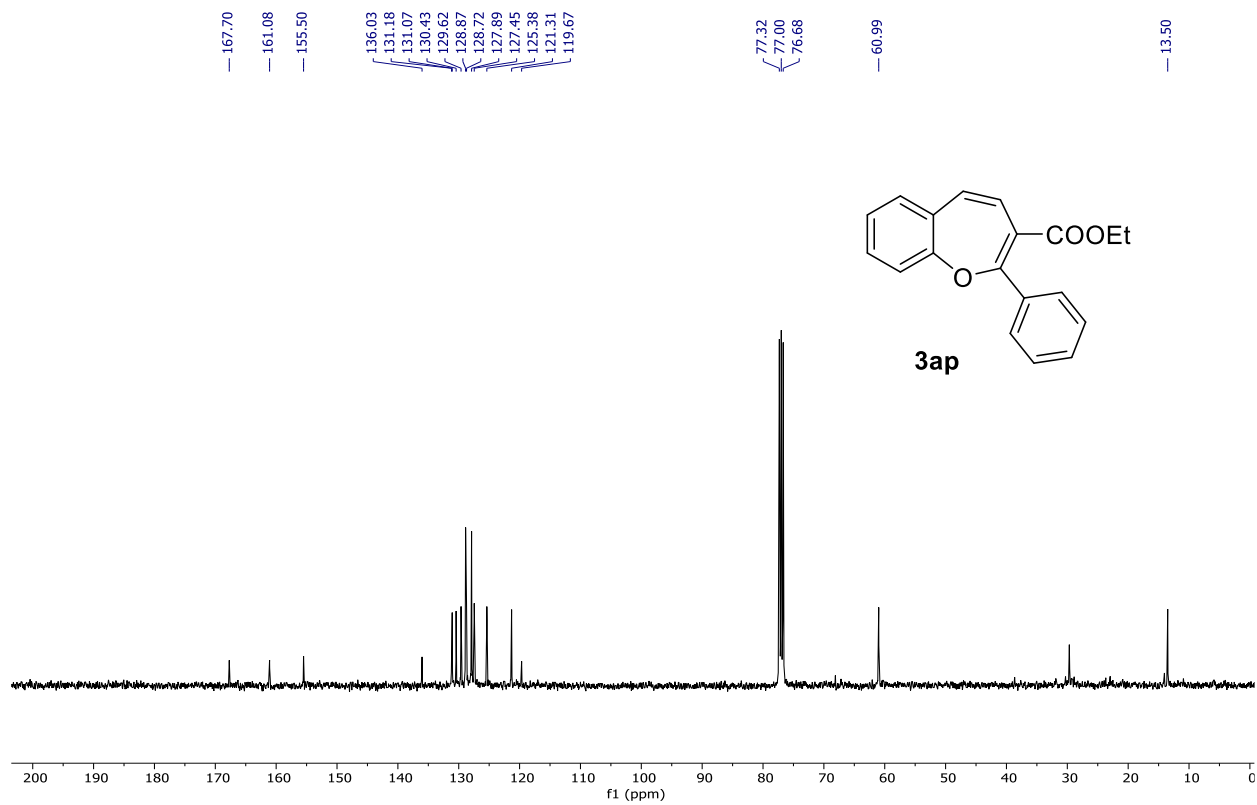

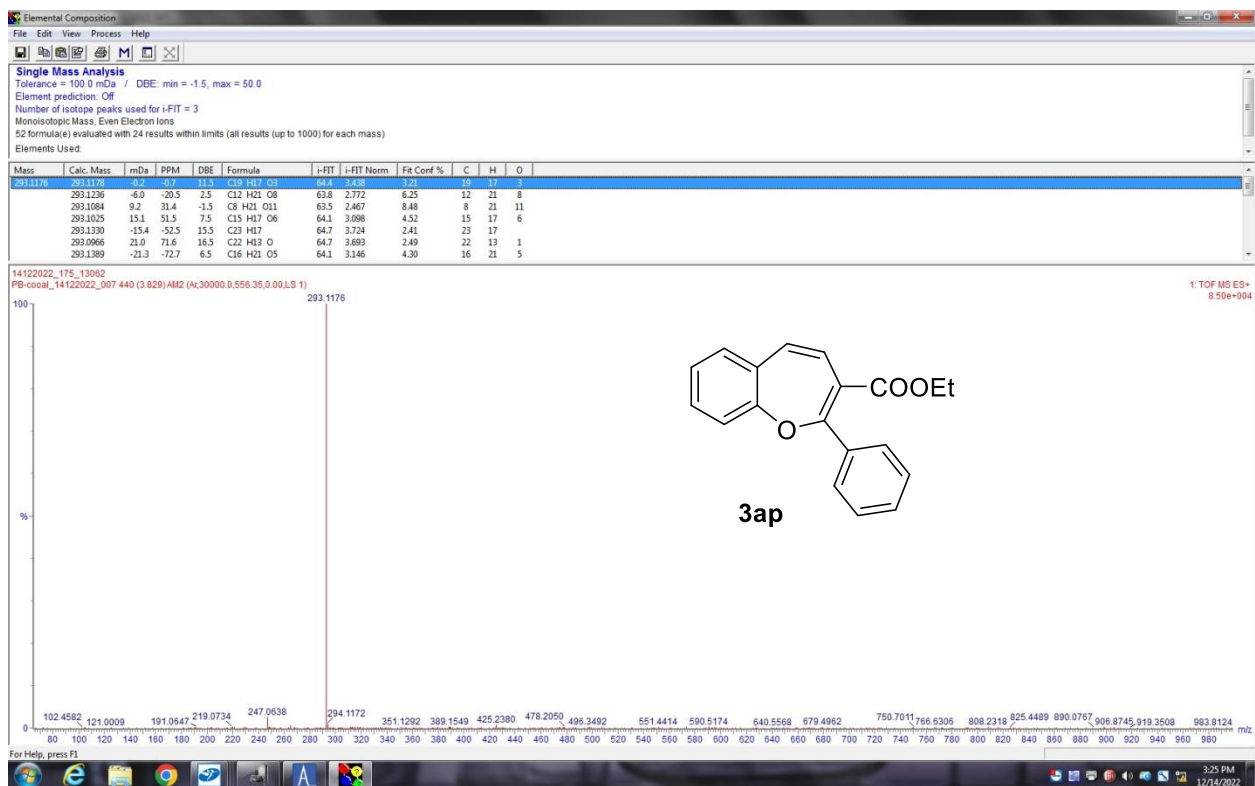

41451.1.fid  
41451  
TG-R-1

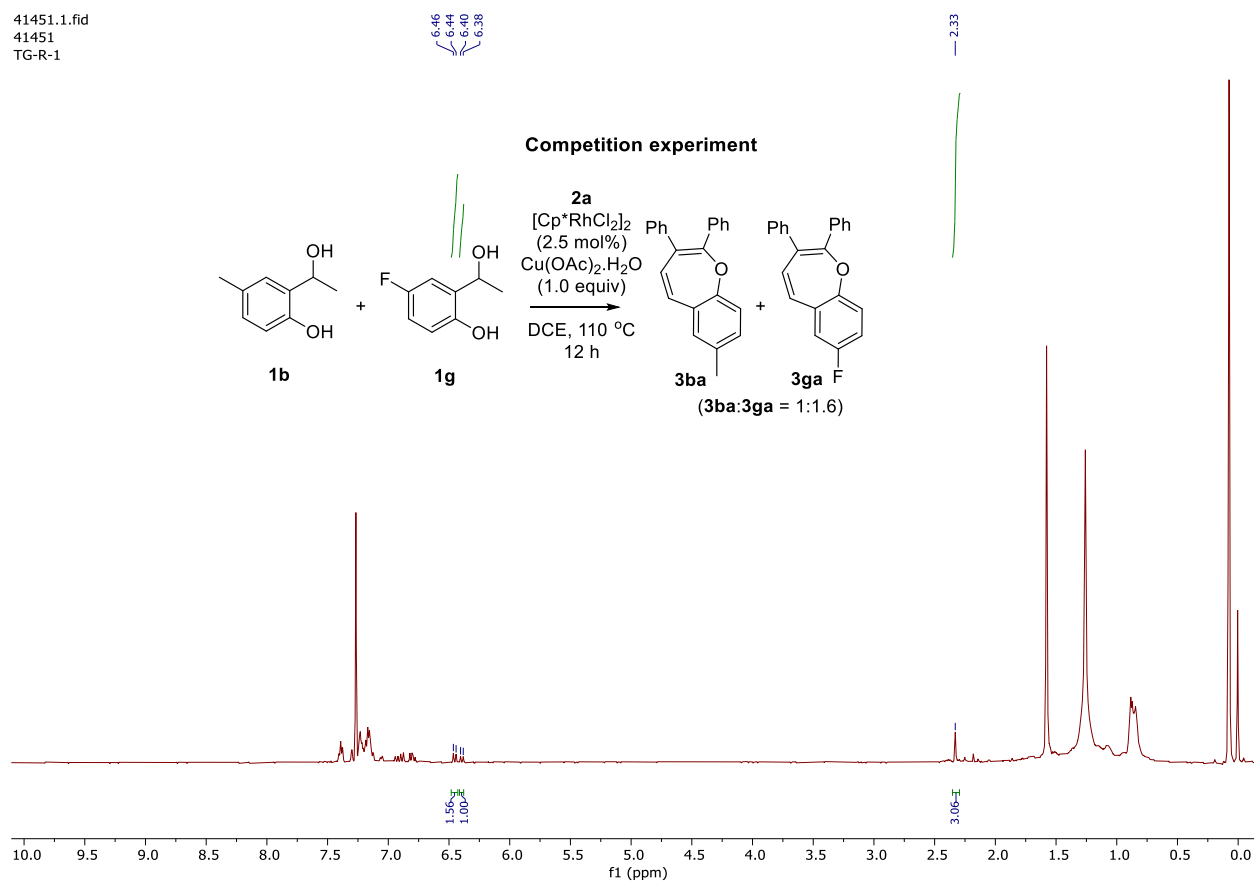



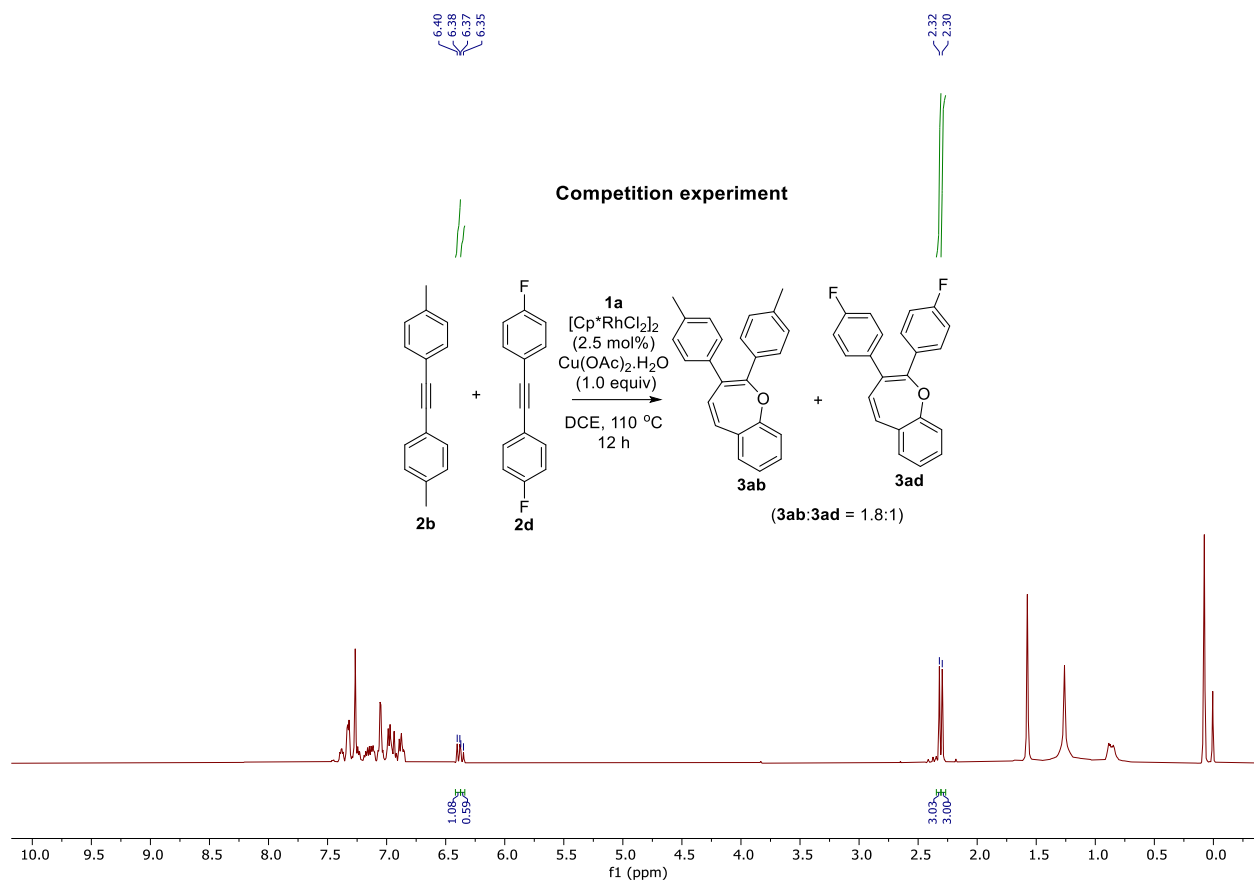

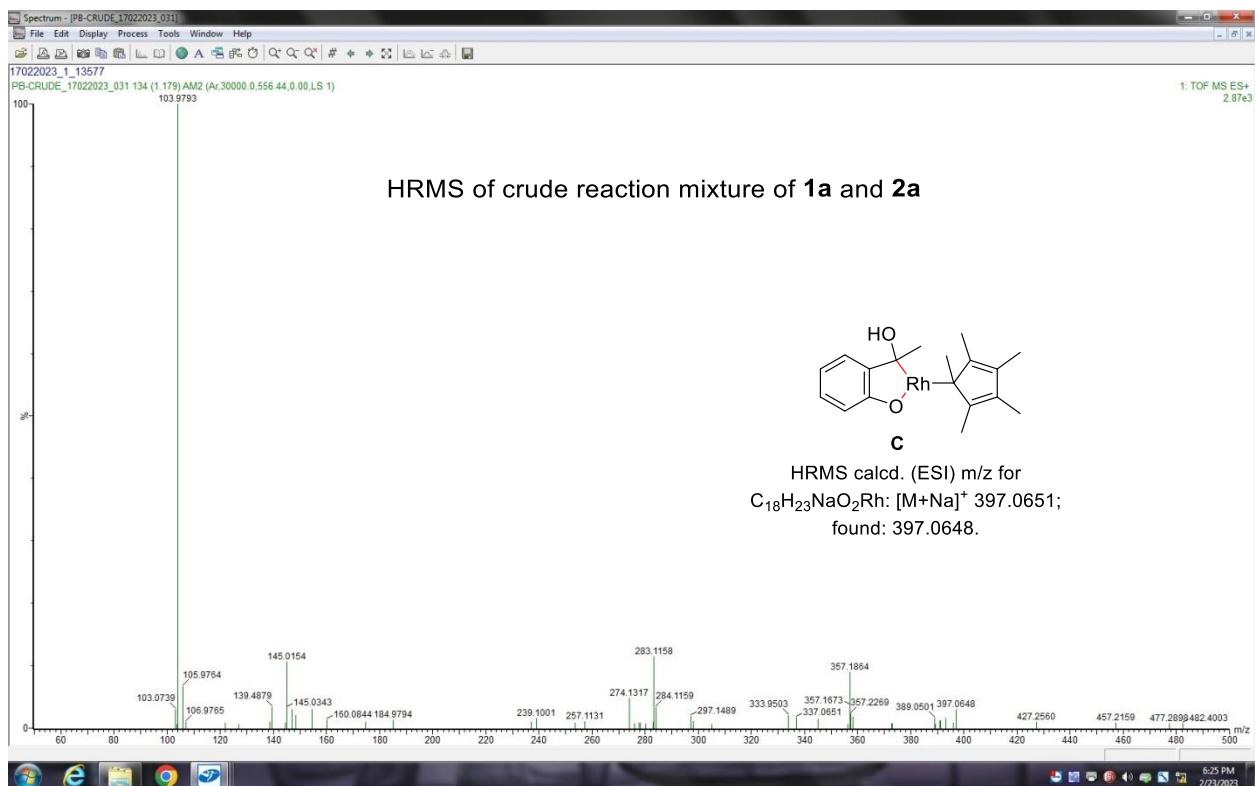

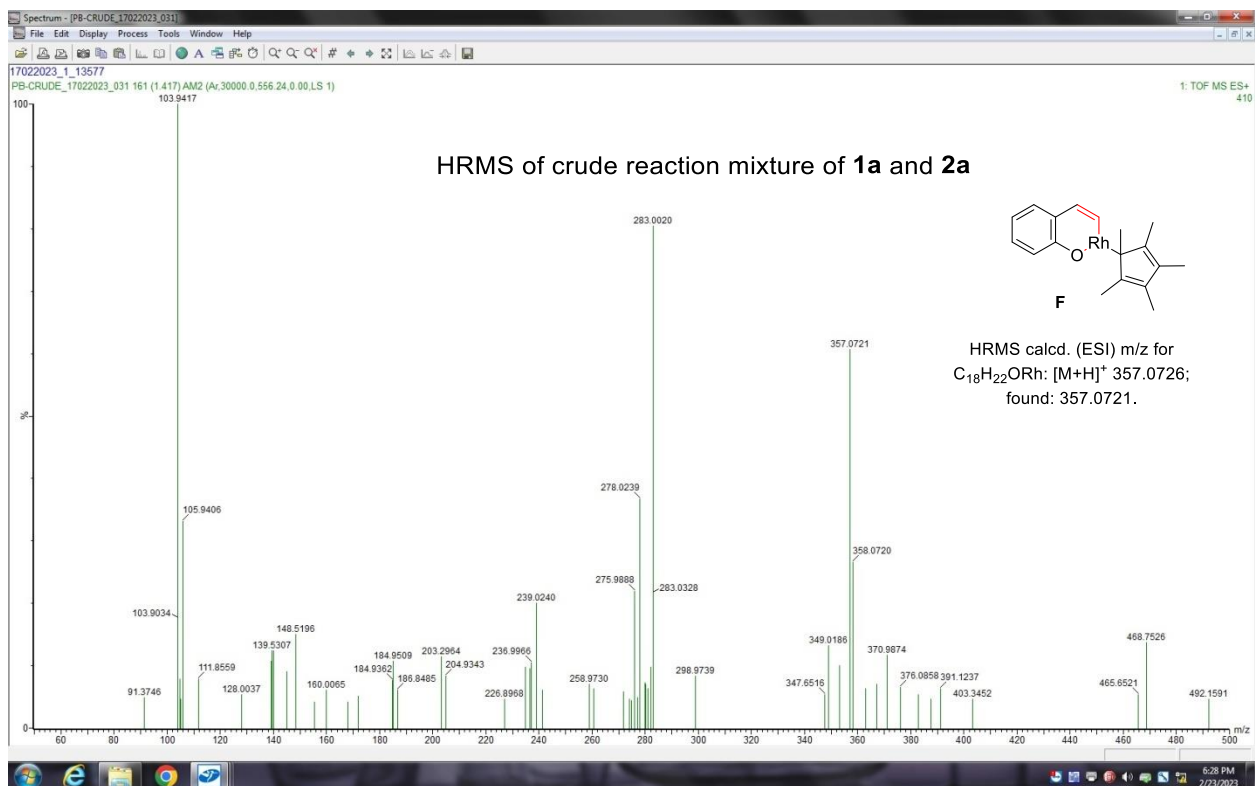

Supplement: d3ob00170a1.pdf [file d3ob00170a1.pdf]
